# Supplementary material for: Unconventional sulfur transfer behaviour of 4-hydroxy-dithiocoumarin: an easy access to biologically potent 1,2-dithiolane scaffolds
Source: Royal Society of Chemistry journal article supplement (doi:10.1039/d2nj04791h), 2022-12-13

## Electronic Supporting Information

### **Unconventional sulfur transfer behaviour of 4-hydroxy-dithiocoumarin: An easy access to biologically potent 1,2-dithiolane scaffolds**

Karuna Mahato,<sup>a</sup> Santa Mondal,<sup>a</sup> Ahmed Ali,<sup>a</sup> Prasanta Ray Bagdi,<sup>a</sup> Abu T. Khan,<sup>\*a</sup> Neha Arora,<sup>b</sup> and Siddhartha Sankar Ghosh<sup>b</sup>

<sup>a</sup>Department of Chemistry, Indian Institute of Technology Guwahati, Guwahati 781 039, India

<sup>b</sup>Department of Biosciences and Bioengineering, Indian Institute of Technology Guwahati, Guwahati 781 039, India

Tel.: +91 361 2582305; Fax: +91 361 2582349

E-mail: atk@iitg.ernet.in (A.T. Khan)

#### **Content**

|                                                                                             |
|---------------------------------------------------------------------------------------------|
| <b>1. General Information and Methods</b>                                                   |
| <b>2. Control experiments</b>                                                               |
| <b>3. X-ray Structure of Compounds 3d</b>                                                   |
| <b>4. HRMS of the intermediate</b>                                                          |
| <b>5. Copies of <sup>1</sup>H NMR, <sup>13</sup>C NMR and HRMS spectra of all Compounds</b> |

## I. General Information and Methods

$^1\text{H}$  and  $^{13}\text{C}$  NMR spectra were recorded on 400 MHz, 600 MHz and 100 MHz, 150 MHz spectrometer TMS as internal reference; chemical shifts ( $\delta$  scale) are reported in parts per million (ppm).  $^1\text{H}$  NMR Spectra are reported in the order: multiplicity, coupling constant ( $J$ value) in hertz (Hz) and no of protons; signals were characterized as s (singlet), d (doublet), t (triplet), m (multiplet) and b s (broad singlet). IR spectra were recorded in KBr. HRMS spectra were recorded using ESI and APCI (TOF) mode. The X-ray crystal structures were determined with a diffractometer. Complete crystallographic data of **3c** (CCDC no.1454211), for the structural analysis have been deposited with the Cambridge Crystallographic Data Centre, Copies of this information may be obtained free of charge from the Director, Cambridge Crystallographic Data Centre, 12 Union Road, Cambridge CB2 1EZ, UK, (fax: +44-1223-336033, e-mail: [deposit@ccdc.cam.ac.uk](mailto:deposit@ccdc.cam.ac.uk) or via: [www.ccdc.cam.ac.uk](http://www.ccdc.cam.ac.uk)).

## 2. Control experiments

To examine the sulfur transfer behaviour between two different 4-hydroxydithiocoumarins, we have examined a reaction with 4-hydroxydithiocoumarin, 7-chloro-4-hydroxydithiocoumarin and 4-methylbenzaldehyde using 10 mol%  $\text{Cu}_2\text{O}$  nanoparticles in water under reflux conditions. We have isolated both the cyclic product as expected. It shows that sulfur transfer is taking place among themselves.

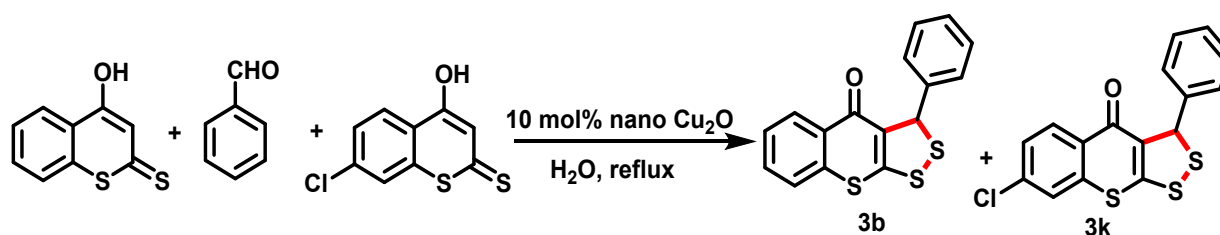

Scheme S1. Control Experiments

### 3. Crystal Data and Structure Refinement for Compound 3d

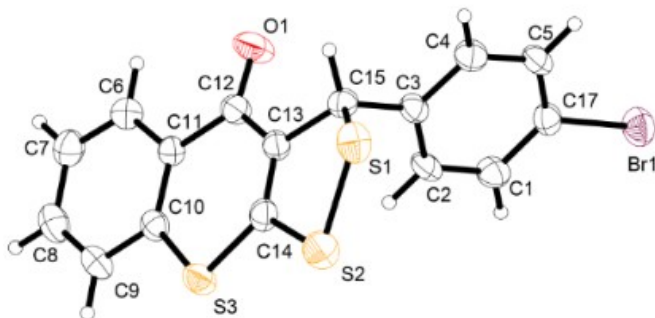

**Figure S1.** ORTEP view of the compound **3d**

**Table S1** Data collection and refinement statistics for the compounds **3d**

| Entry | Identification code | Compound <b>3d</b>                                 |
|-------|---------------------|----------------------------------------------------|
| 01    | Empirical formula   | C <sub>16</sub> H <sub>9</sub> Br O S <sub>3</sub> |
| 02    | Formula weight      | 393.32                                             |
| 03    | Temperature         | 296(2) K                                           |
| 04    | Wavelength          | 0.71073                                            |
| 05    | Radiation type      | Mo K $\alpha$                                      |
| 06    | Radiation source    | Fine-focus sealed tube                             |
| 07    | Crystal system      | Orthorhombic                                       |
| 08    | Space group         | P 21 21 21                                         |
| 09    | Cell length         | a = 5.5072(2)<br>b = 12.8308(4)<br>c = 21.2270(7)  |
| 10    | Cell Angle          | $\alpha$ 90 $\beta$ 90 $\gamma$ 90                 |
| 11    | Cell Volume         | 1499.94(9)                                         |
| 12    | Density             | 1.742                                              |

|    |                       |                                     |
|----|-----------------------|-------------------------------------|
| 13 | Completeness to theta | 25°/ 97% 25.04                      |
| 14 | Absorption correction | multi-scan                          |
| 15 | Refinement method     | Full-matrix least-squares on F2     |
| 16 | Index ranges          | -6<=h<=6, -15<=k<=15,<br>-25<=l<=25 |
| 17 | Reflection number     | 0.0415 (2162)                       |
| 18 | Theta range           | 3.29-20.20                          |
| 19 | Cell formula units Z  | 4                                   |
| 20 | CCDC no               | 1572813                             |

#### 4. Mass of intermediate

This mechanism was supported by the HRMS of compounds **3a** and **4** while carrying out the reaction of 4-hydroxydithiocoumarin and 4-methylbenzaldehyde. When the reaction was performed with 4-hydroxydithiocoumarin and benzaldehyde, we got the intermediate **B** and **E** in

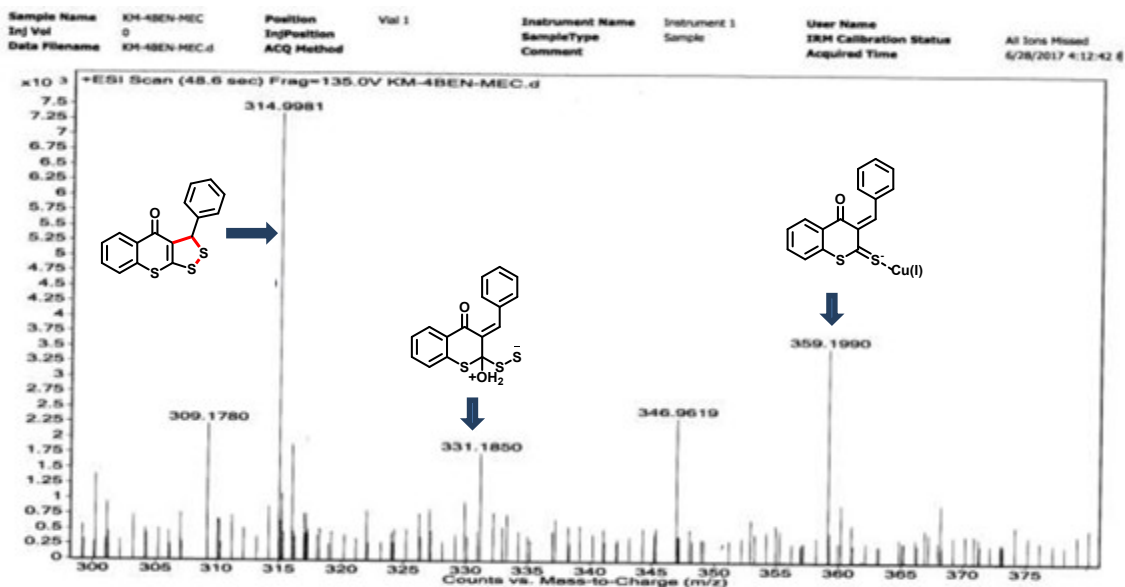

the crude reaction mixture along with **3b**.

**Figure S2.** Mass analysis of crude mixture of the compound **3a**

Figure S3. Mass analysis of crude mixture of the compound **3b**

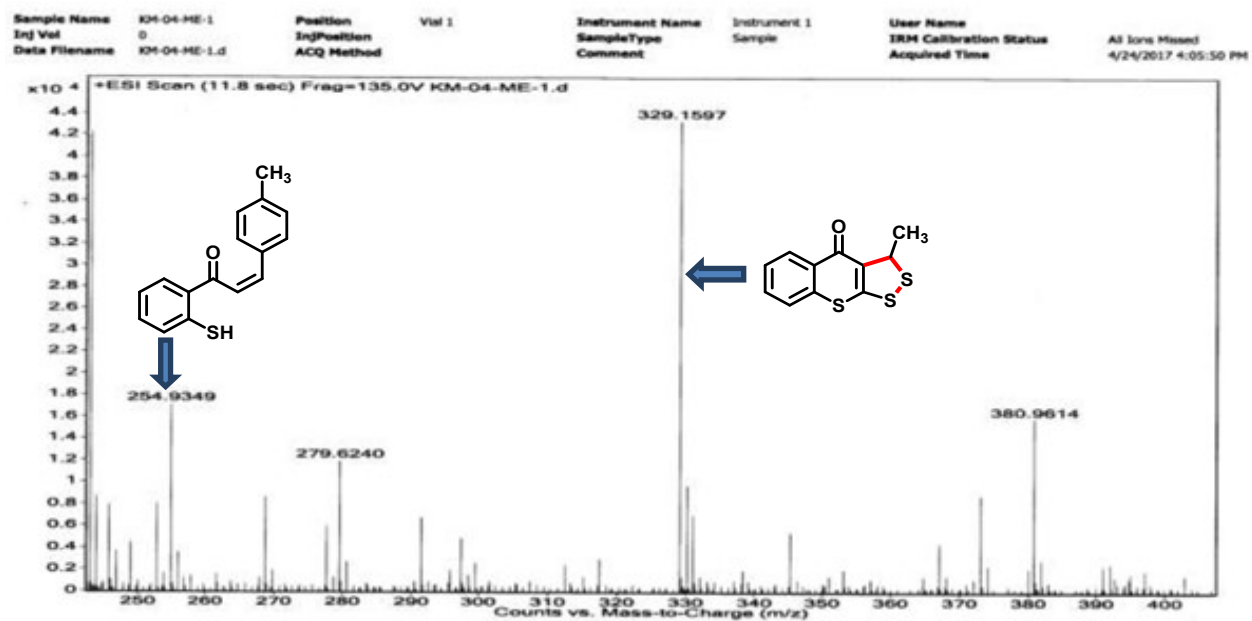

## 5. Copies of $^1\text{H}$ NMR, $^{13}\text{C}$ NMR, and HRMS spectra of all Compounds

### $^1\text{H}$ NMR spectra of compound: 3a

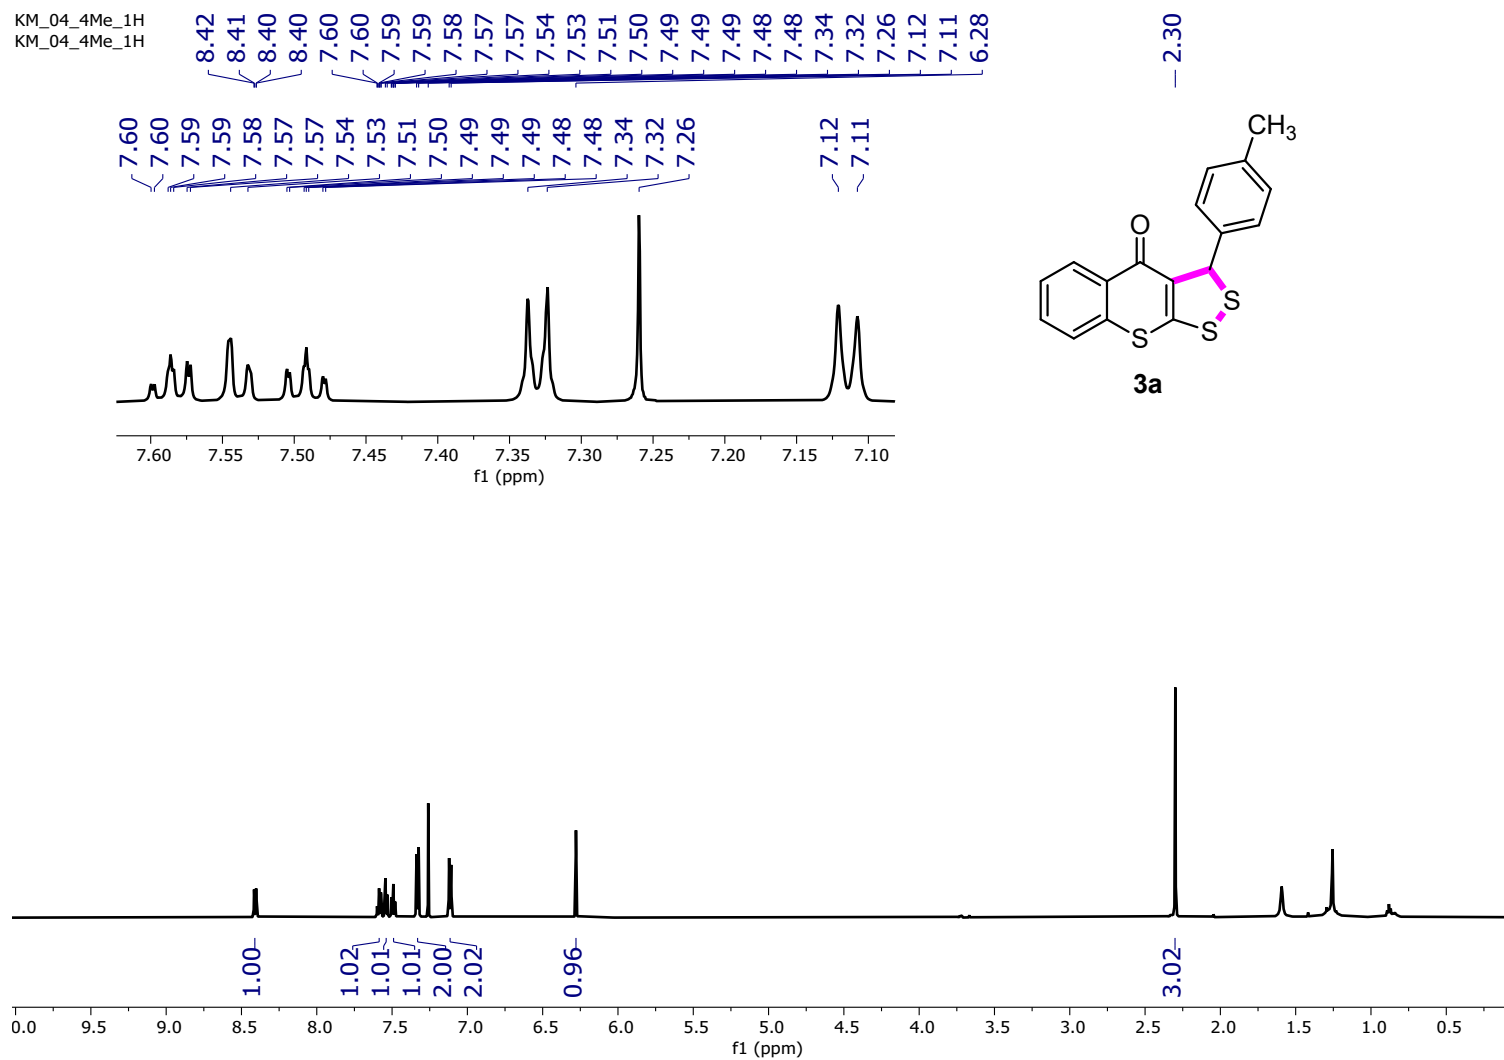

<sup>13</sup>CNMR spectra of compound: 3a

KM\_04\_4Me\_13C  
KM\_04\_4Me\_13C

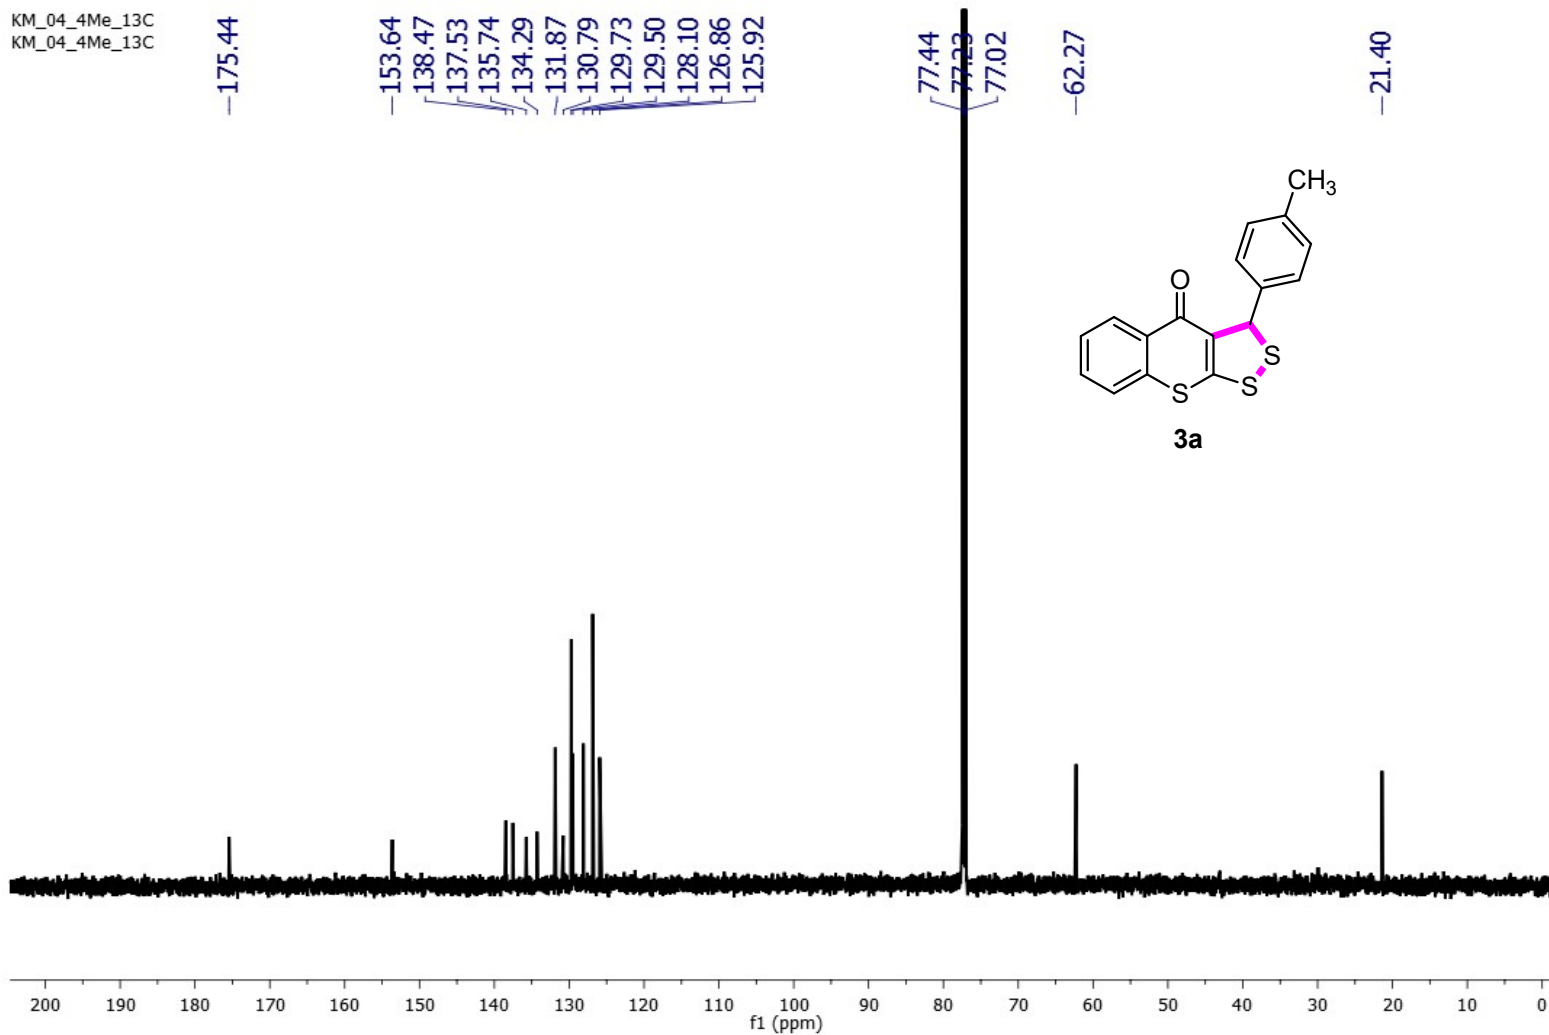



# HRMS spectra of compound: 3a

| Sample Name   | Position    | Instrument Name | User Name              |
|---------------|-------------|-----------------|------------------------|
| Inj Vol       | InjPosition | SampleType      | IRM Calibration Status |
| Data Filename | ACQ Method  | Comment         | Acquired Time          |

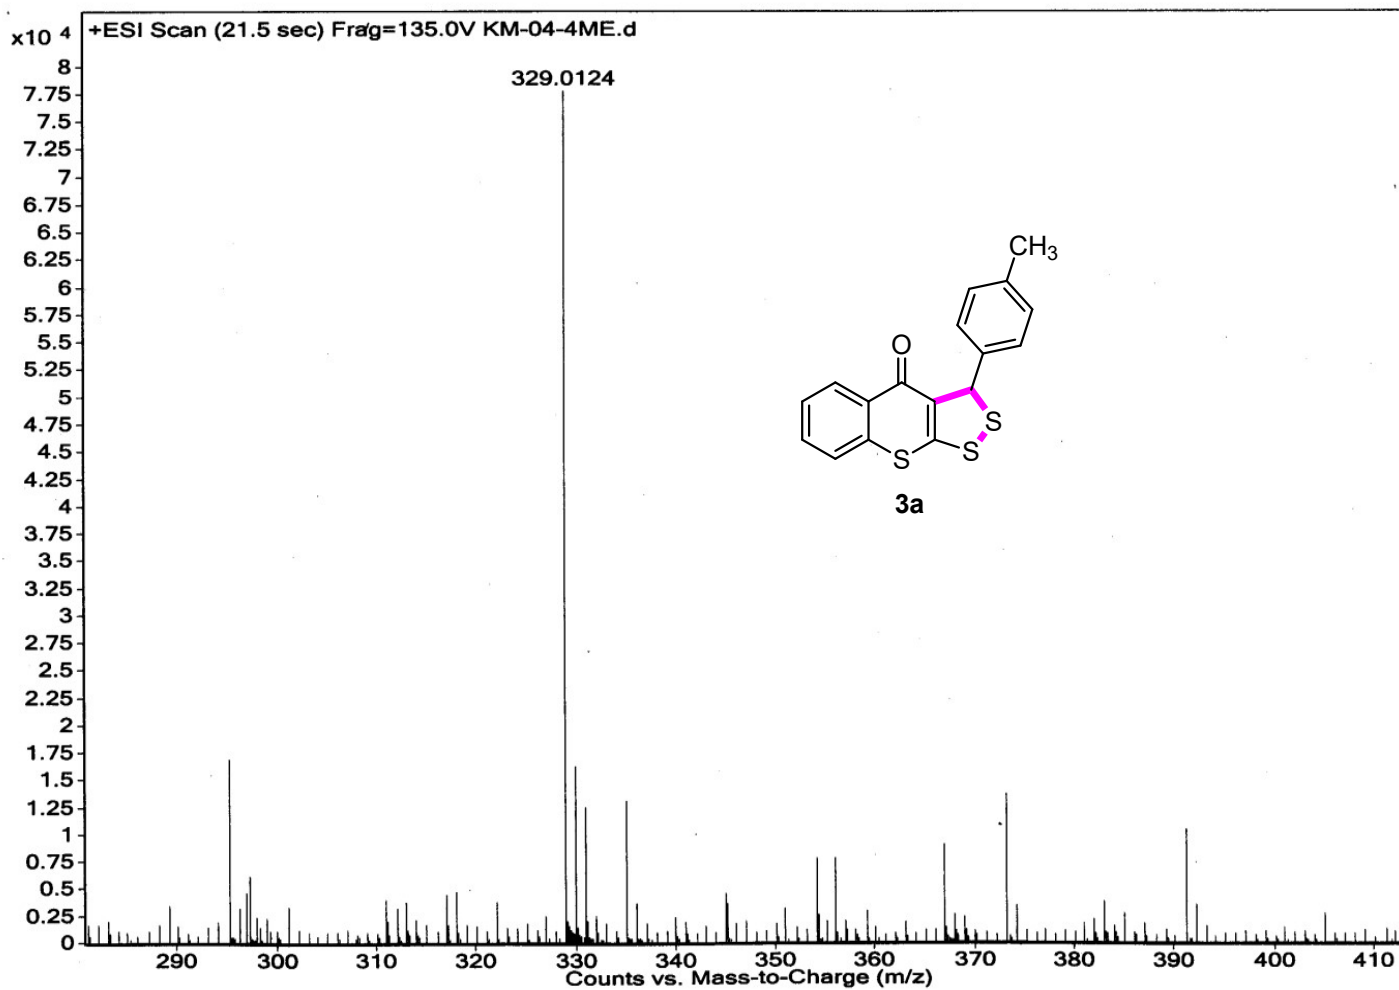

### <sup>1</sup>H NMR spectra of compound: 3b

KM-04-Ben-1H  
KM-04-Ben-1H

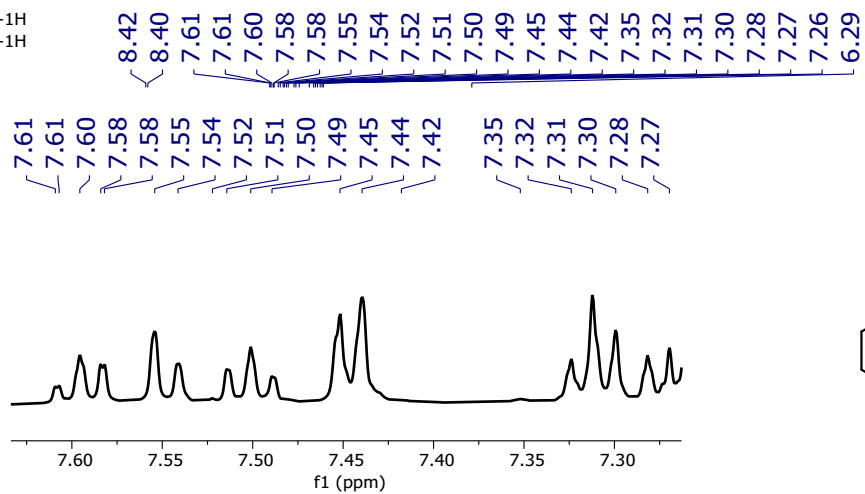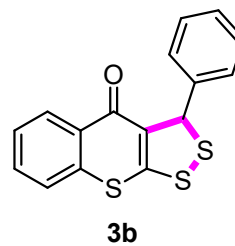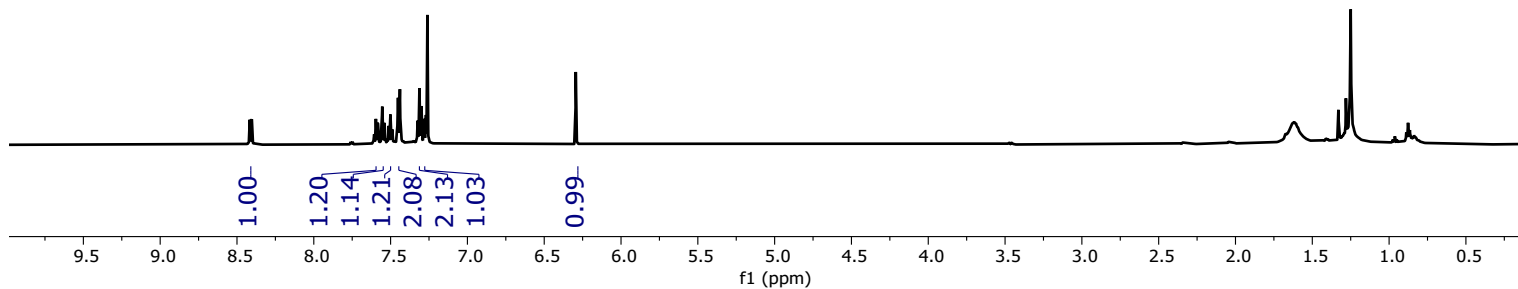

### <sup>13</sup>CNMR spectra of compound: 3b

KM-04-Ben-13C  
KM-04-Ben-13C

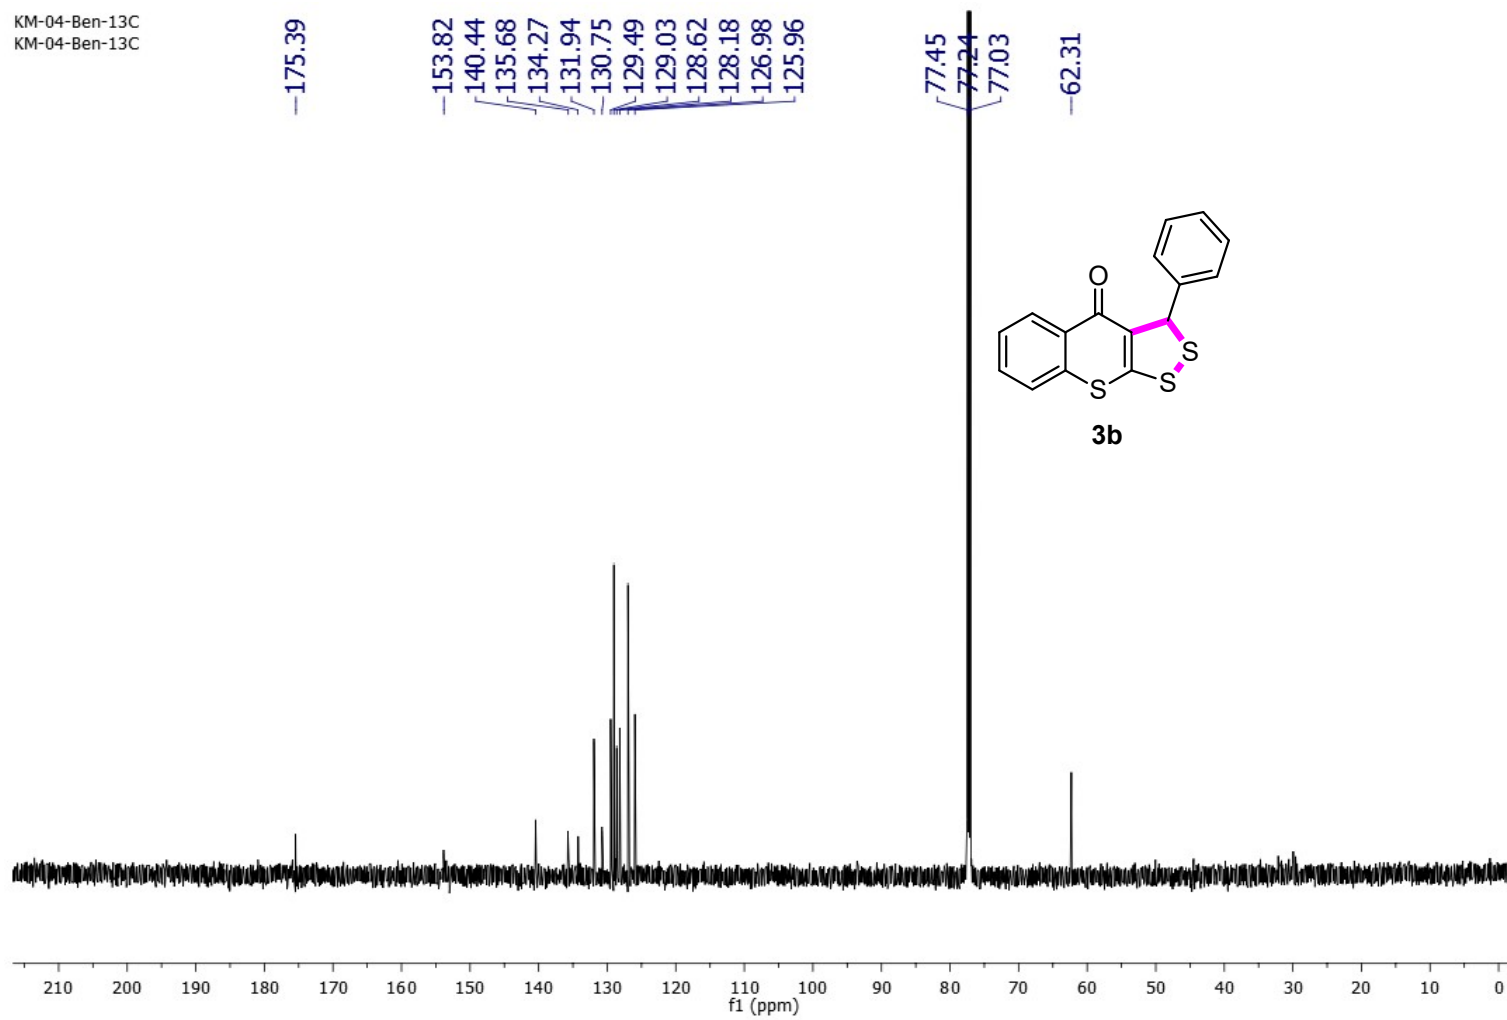

## HRMS spectra of compound: 3b

|               |             |             |        |                 |              |                        |                      |
|---------------|-------------|-------------|--------|-----------------|--------------|------------------------|----------------------|
| Sample Name   | KM-04-BEN   | Position    | Vial 1 | Instrument Name | Instrument 1 | User Name              |                      |
| Inj Vol       | 0           | InjPosition |        | SampleType      | Sample       | IRM Calibration Status | All Ions Missed      |
| Data Filename | KM-04-BEN.d | ACQ Method  |        | Comment         |              | Acquired Time          | 8/28/2017 4:12:16 PM |

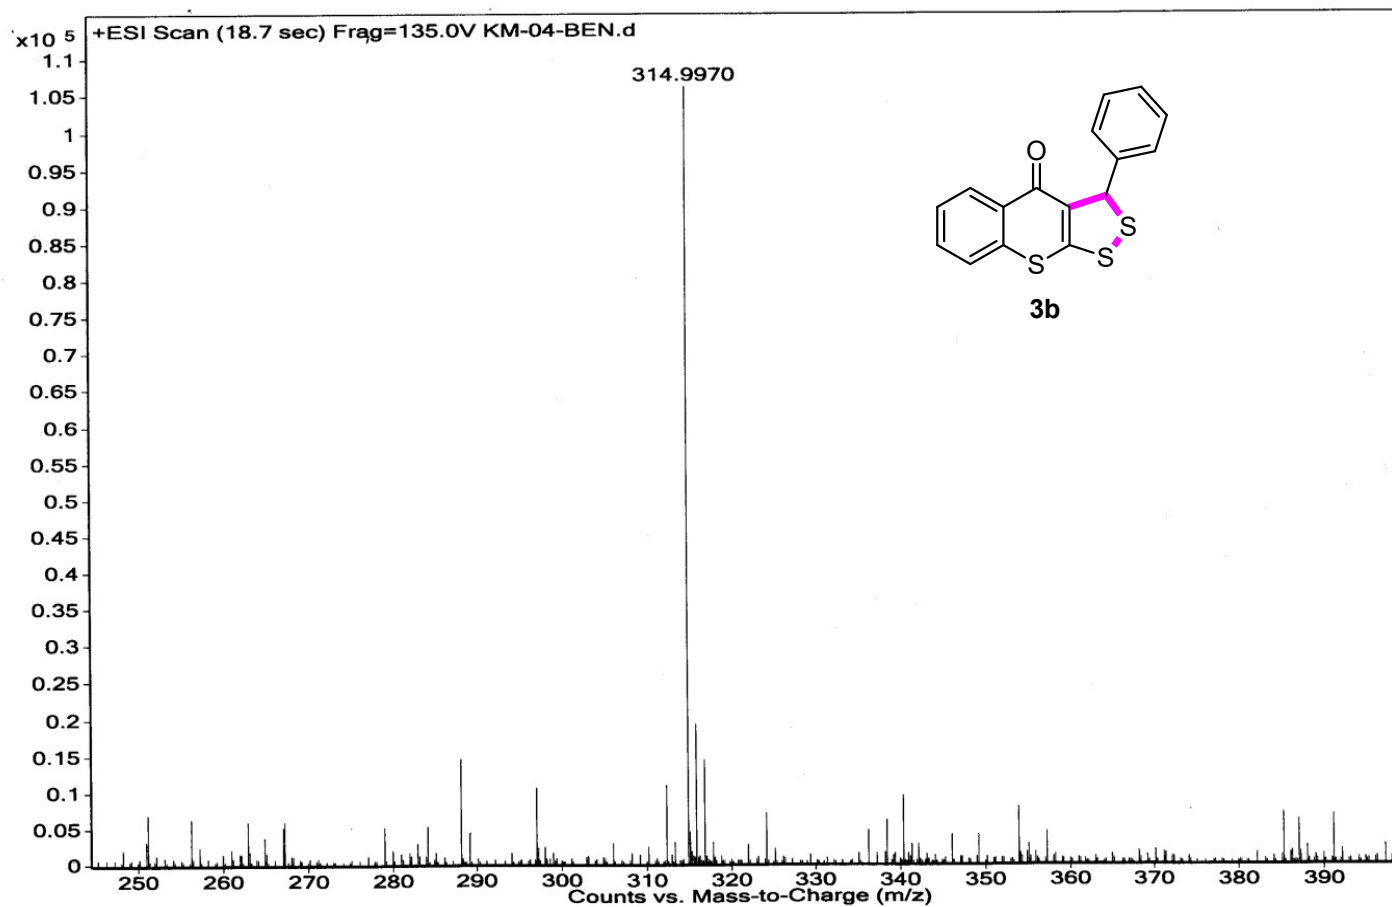

# <sup>1</sup>H NMR spectra of compound: 3c

ATK-SM-1-10-18-1H

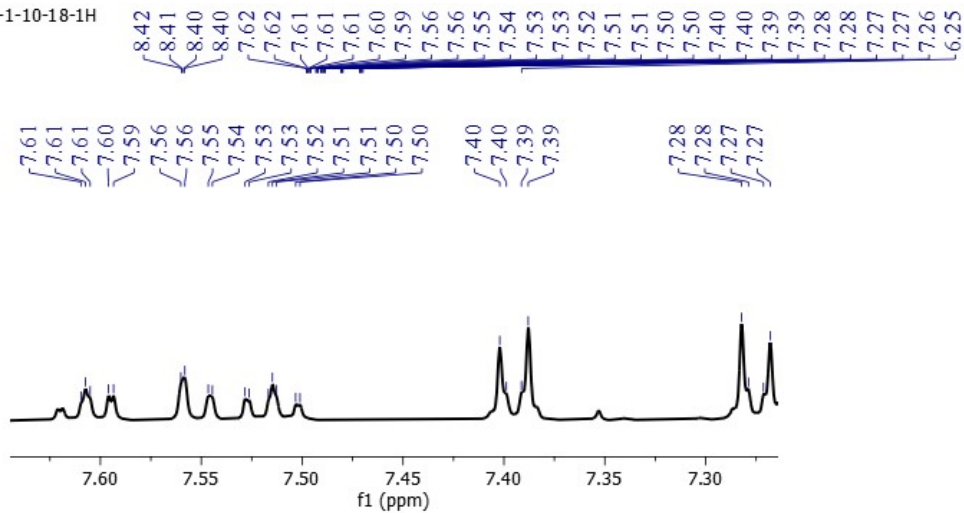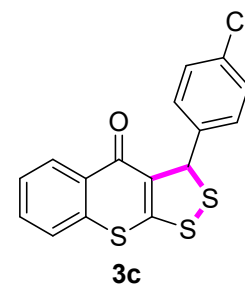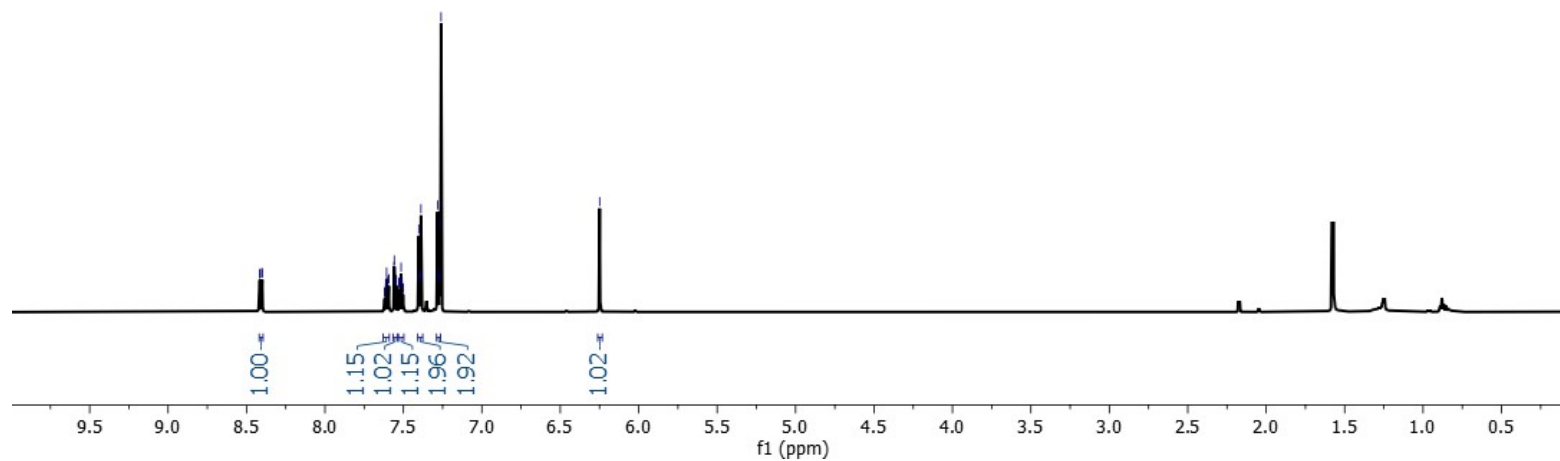

### <sup>13</sup>CNMR spectra of compound: 3c

ATK-SM-1-10-18-13C

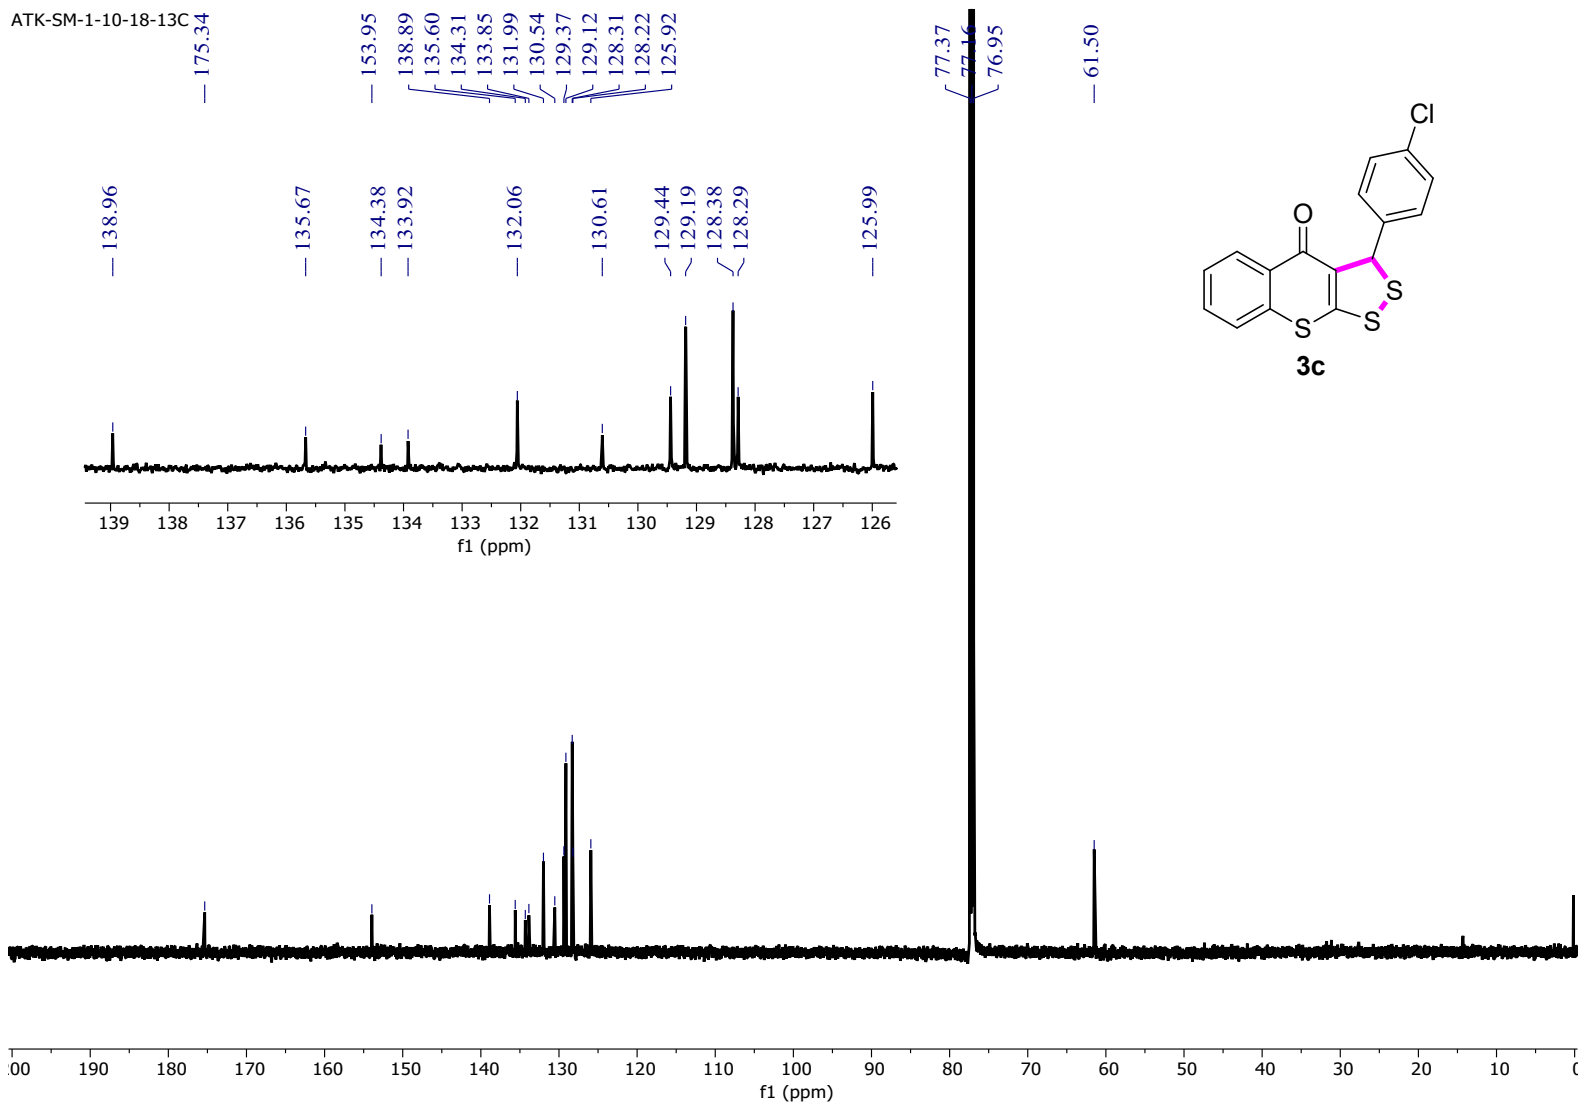

## HRMS spectra of compound: 3c

|               |             |             |             |                 |                                   |                        |                  |
|---------------|-------------|-------------|-------------|-----------------|-----------------------------------|------------------------|------------------|
| Sample Name   | Unavailable | Position    | Unavailable | Instrument Name | Unavailable                       | User Name              | Unavailable      |
| Inj Vol       | Unavailable | InjPosition | Unavailable | SampleType      | Unavailable                       | IRM Calibration Status | Some Ions Missed |
| Data Filename | KM-04-4CL.d | ACQ Method  |             | Comment         | Sample information is unavailable | Acquired Time          | Unavailable      |

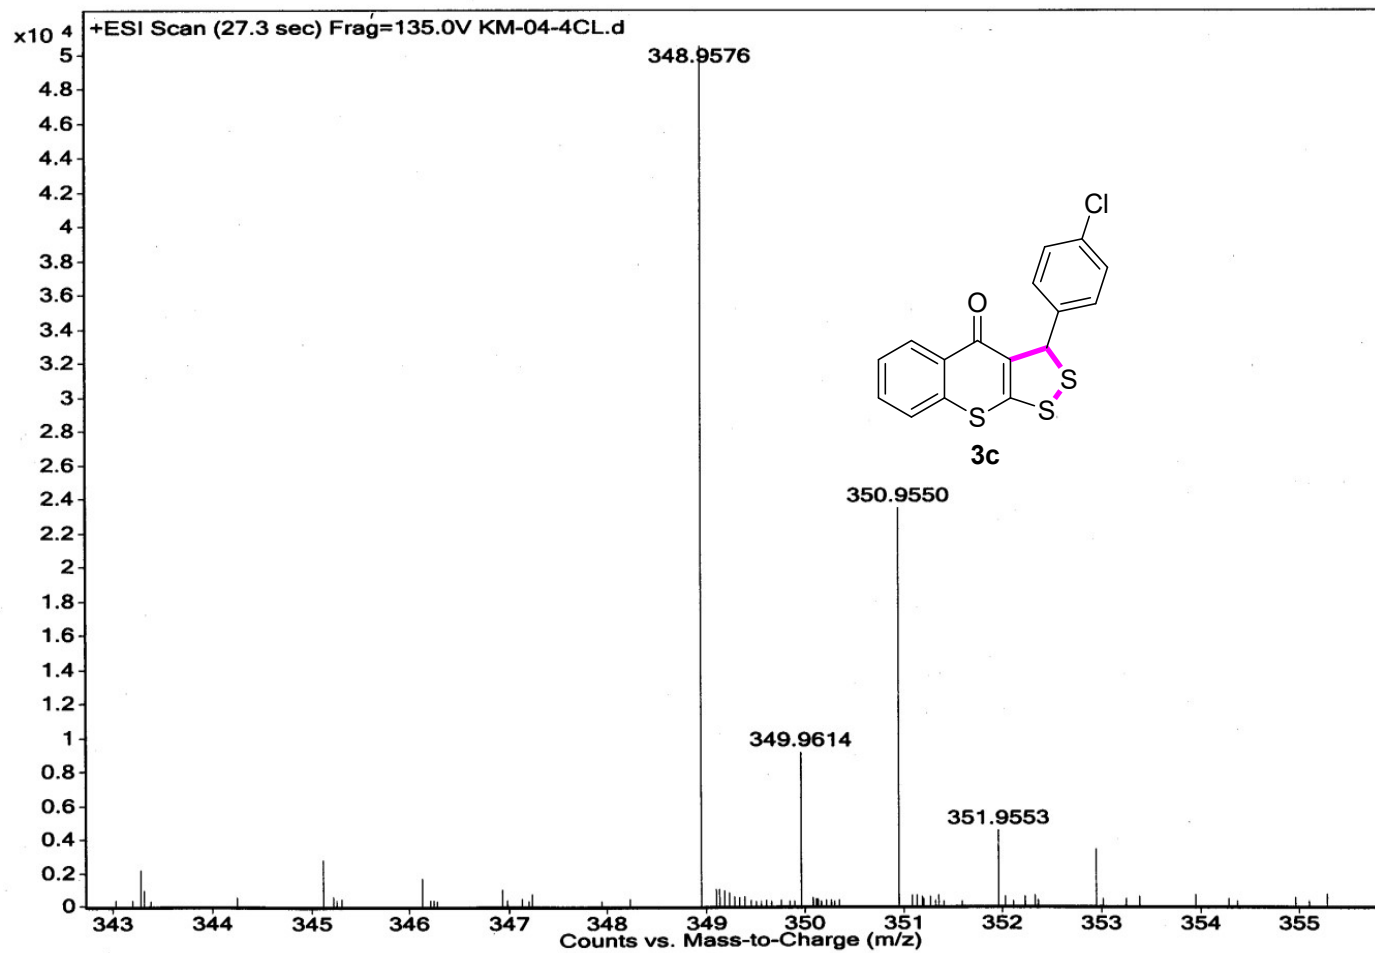

# <sup>1</sup>H NMR spectra of compound: 3d

ATK-D-1H.1.fid  
ATK-D-1H

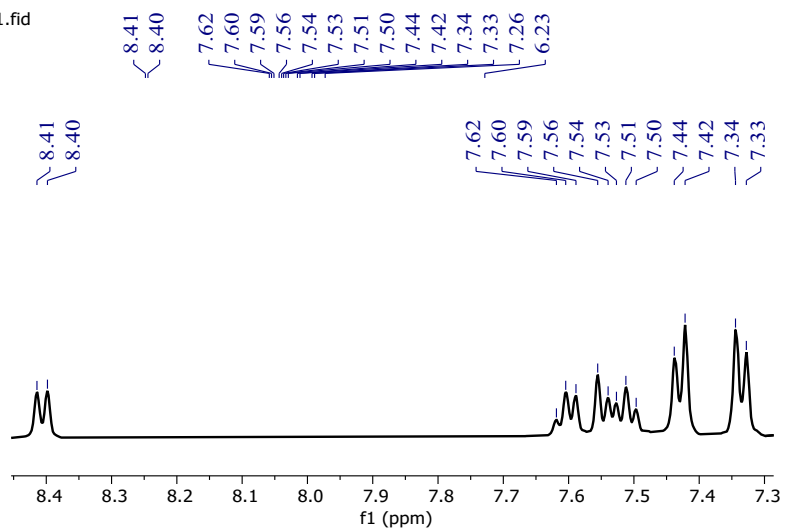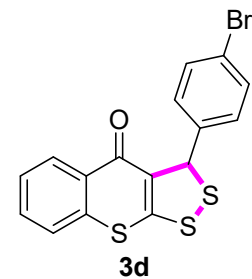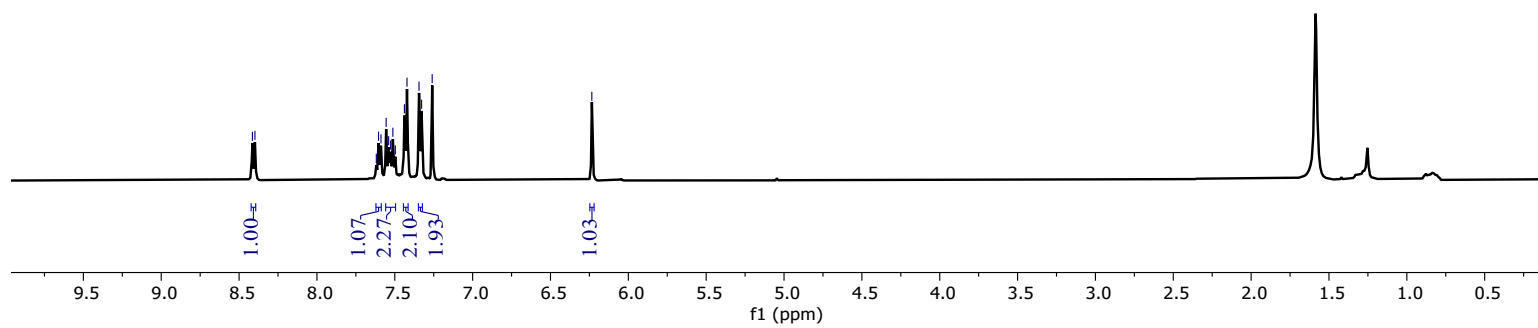



### <sup>13</sup>CNMR spectra of compound: 3d

ATK-D-13C.4.fid  
ATK-D-13C

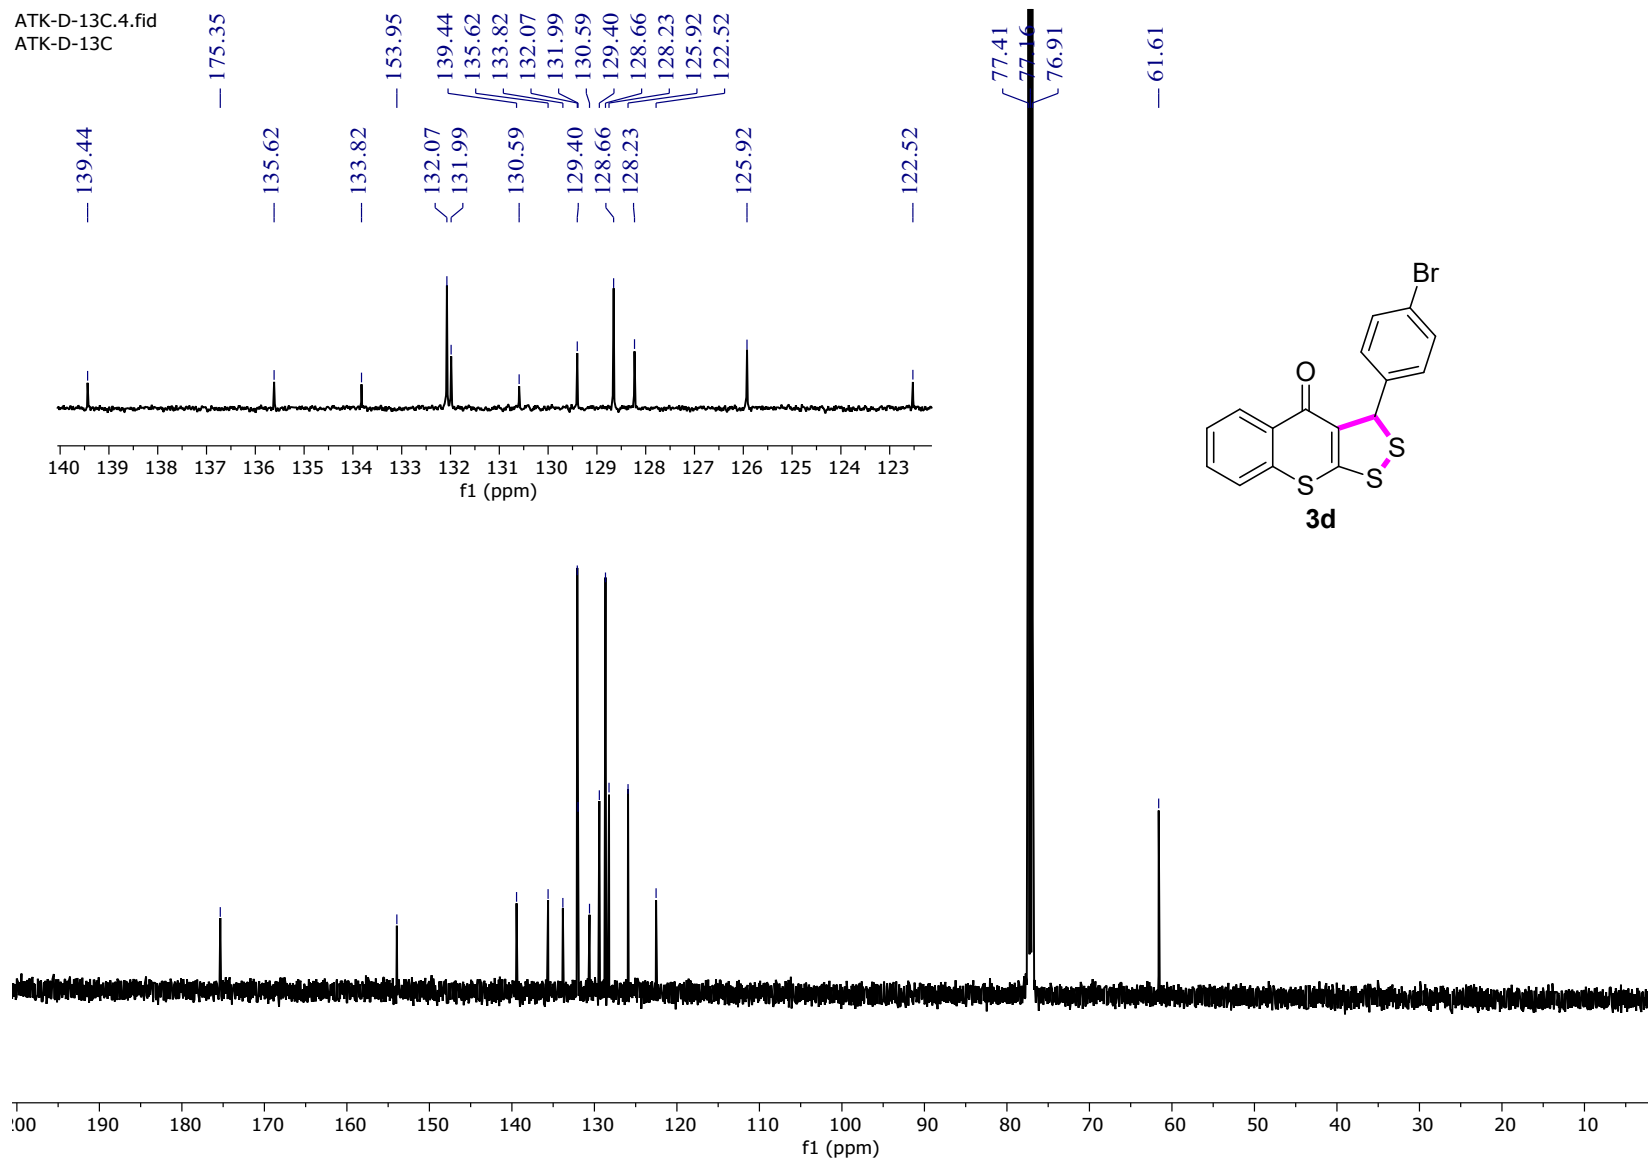

## HRMS spectra of compound: 3d

|               |             |             |        |                 |              |                        |                      |
|---------------|-------------|-------------|--------|-----------------|--------------|------------------------|----------------------|
| Sample Name   | KM-04-4Br   | Position    | Vial 1 | Instrument Name | Instrument 1 | User Name              |                      |
| Inj Vol       | 0           | InjPosition |        | SampleType      | Sample       | IRM Calibration Status | Some Ions Missed     |
| Data Filename | KM-04-4Br.d | ACQ Method  |        | Comment         |              | Acquired Time          | 1/24/2017 3:54:06 PM |

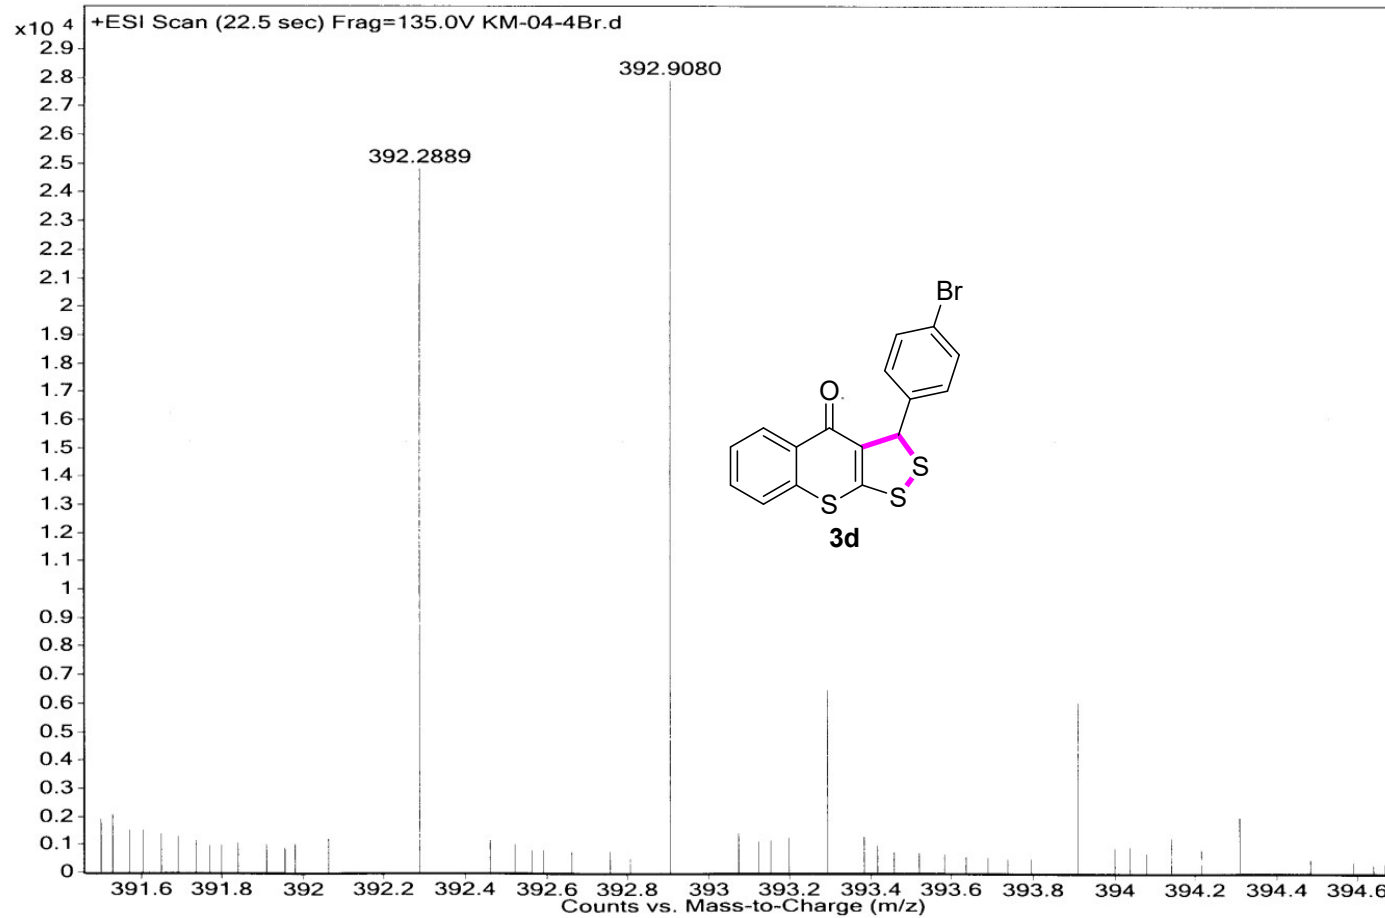

# <sup>1</sup>H NMR spectra of compound: 3e

KM-4F  
single\_pulse

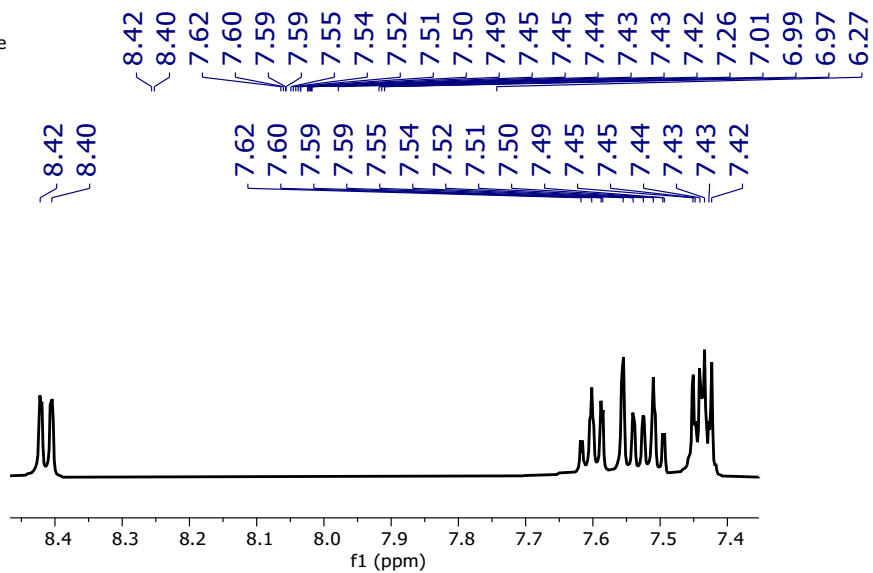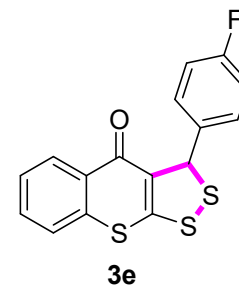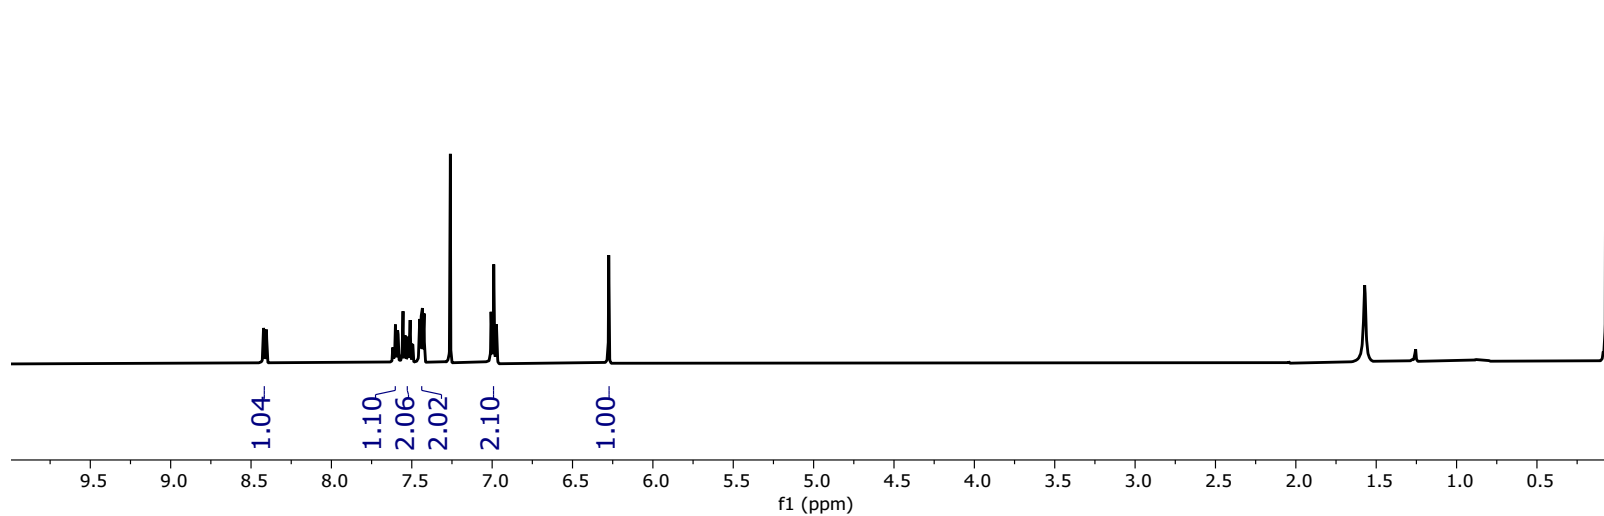

### <sup>13</sup>CNMR spectra of compound: 3e

ATK-E-13C.3.fid  
13C

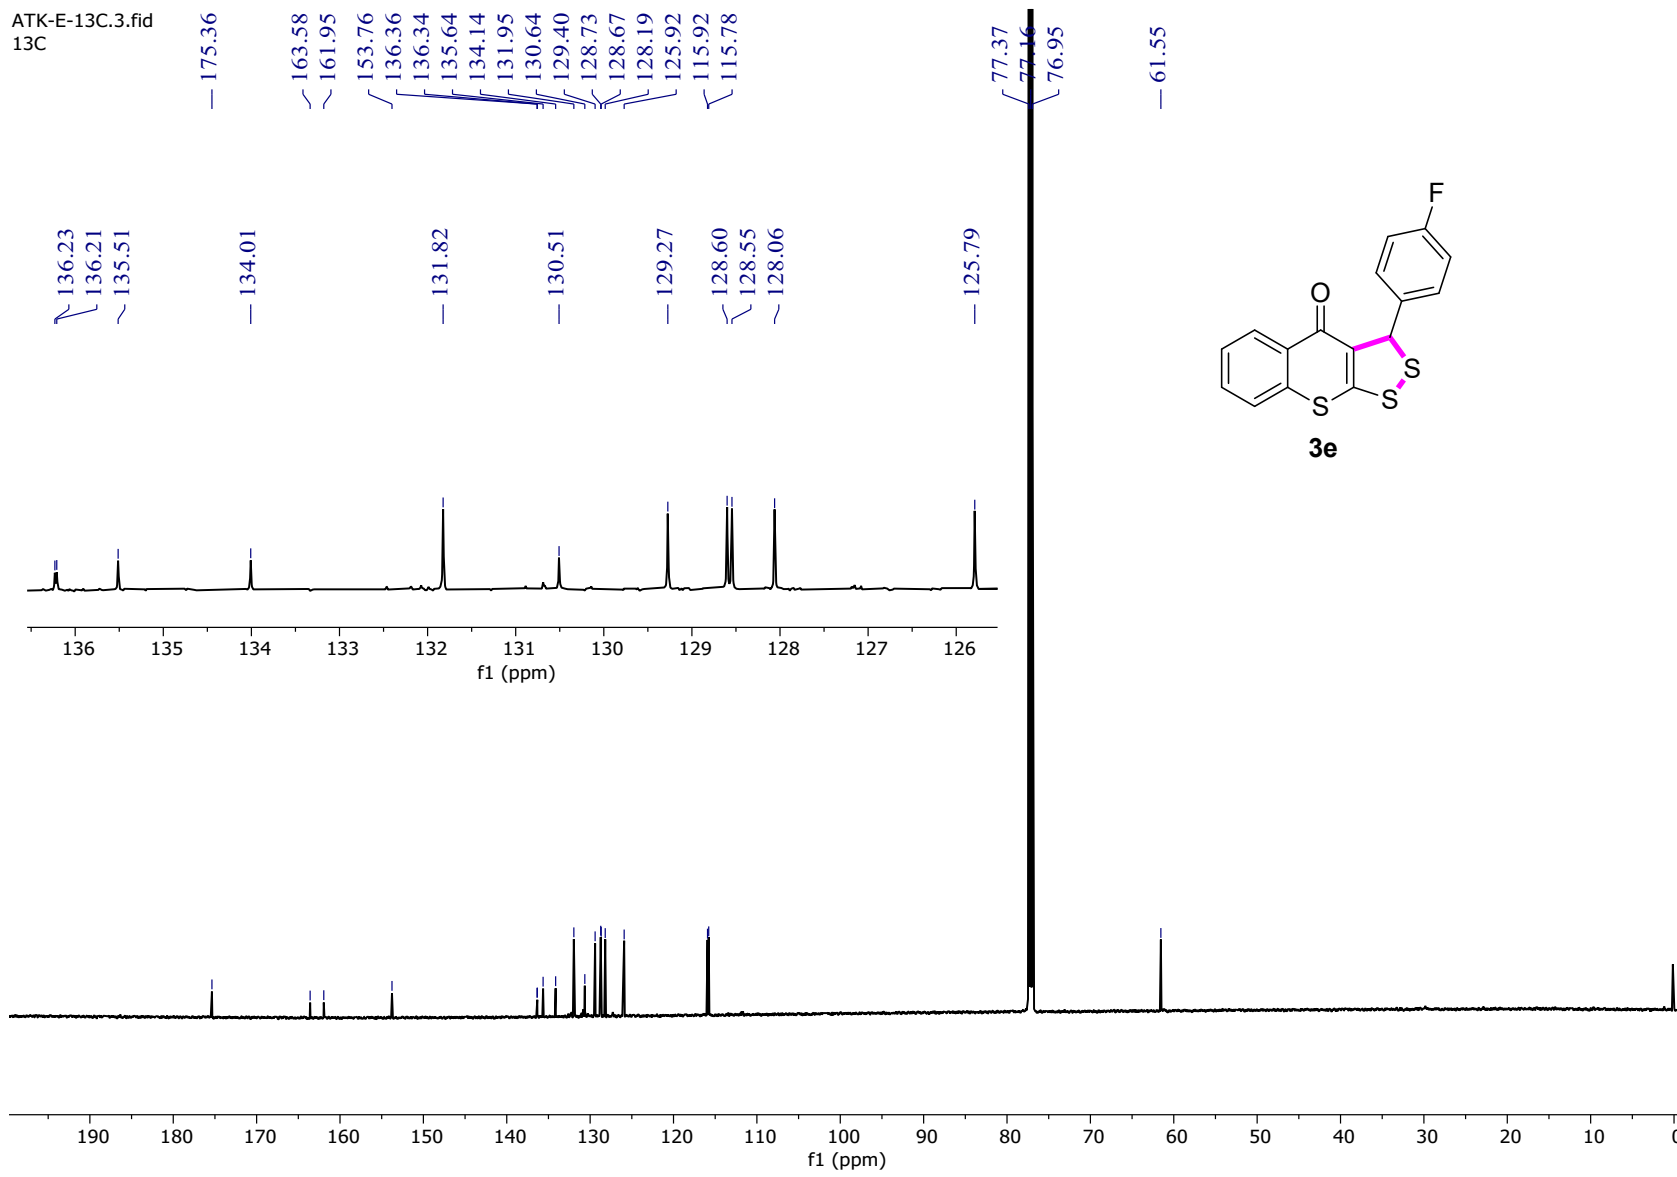

# HRMS spectra of compound: 3e

|               |             |             |             |                 |                                   |                        |                  |
|---------------|-------------|-------------|-------------|-----------------|-----------------------------------|------------------------|------------------|
| Sample Name   | Unavailable | Position    | Unavailable | Instrument Name | Unavailable                       | User Name              | Unavailable      |
| Inj Vol       | Unavailable | InjPosition | Unavailable | SampleType      | Unavailable                       | IRM Calibration Status | Some Ions Missed |
| Data Filename | KM-04-4F.d  | ACQ Method  |             | Comment         | Sample information is unavailable | Acquired Time          | Unavailable      |

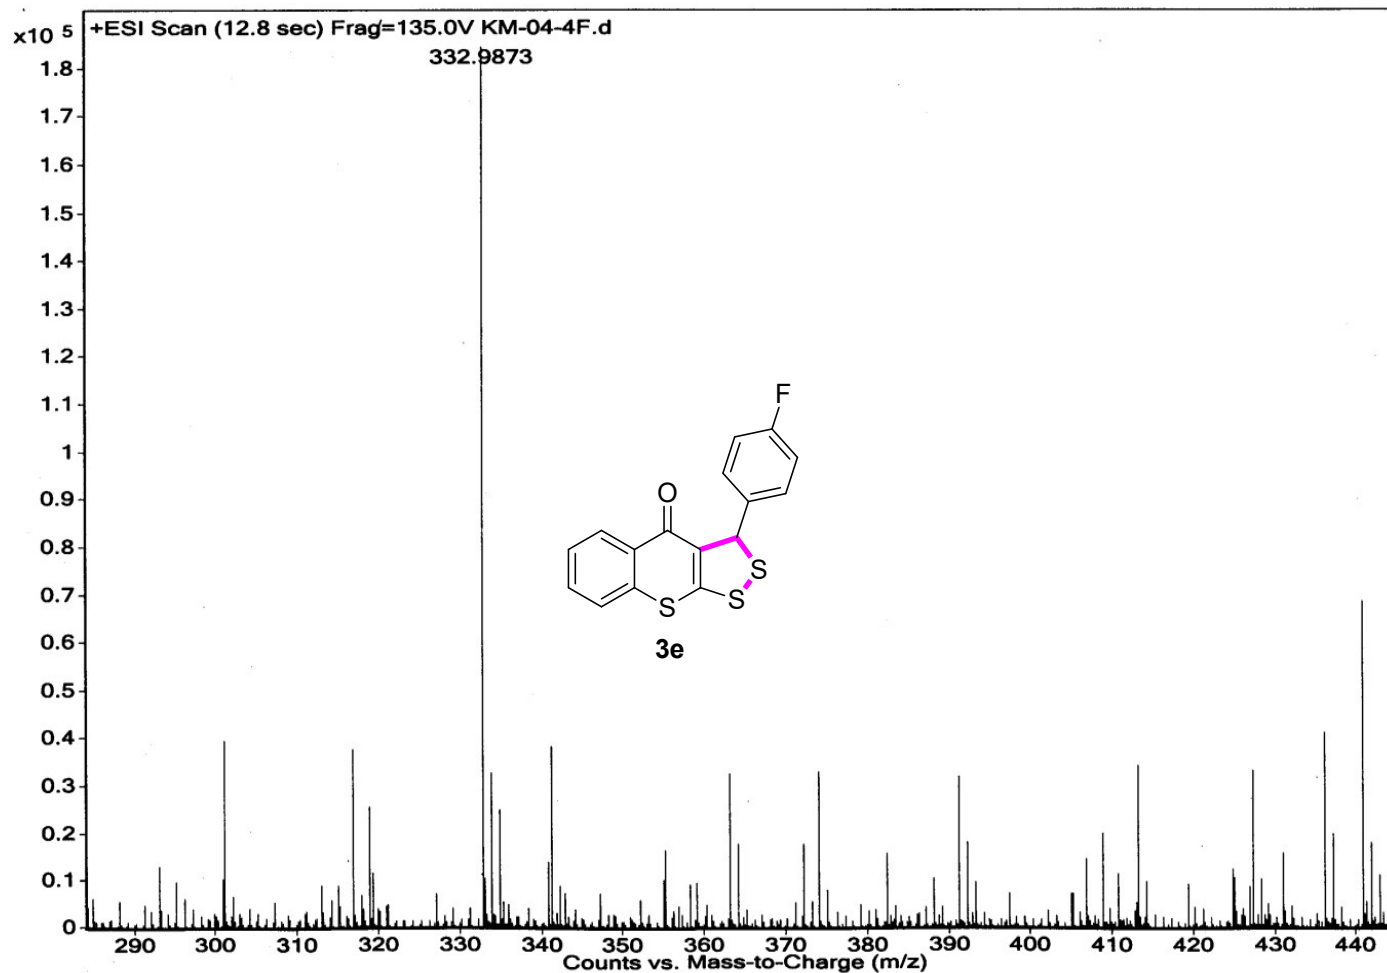

# <sup>1</sup>H NMR spectra of compound: 3f

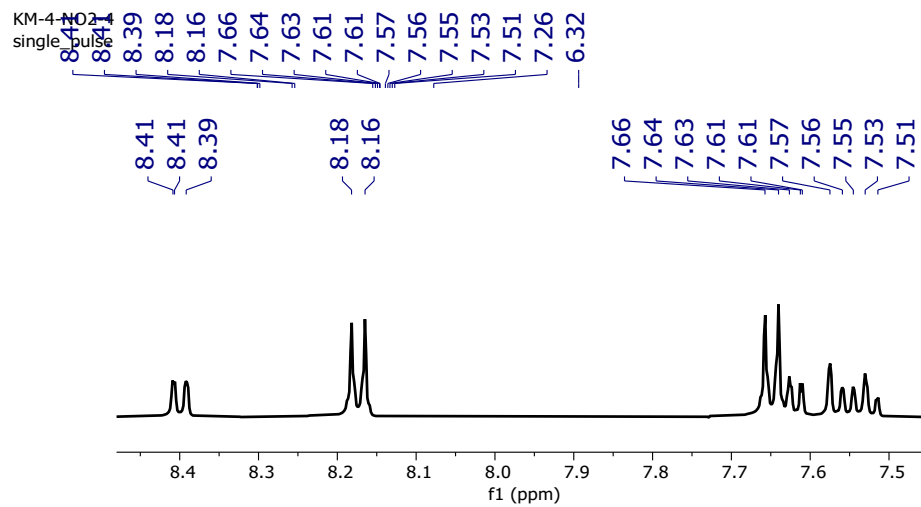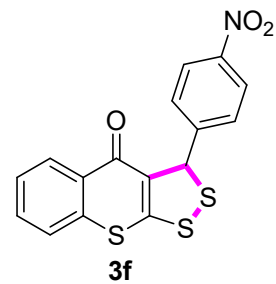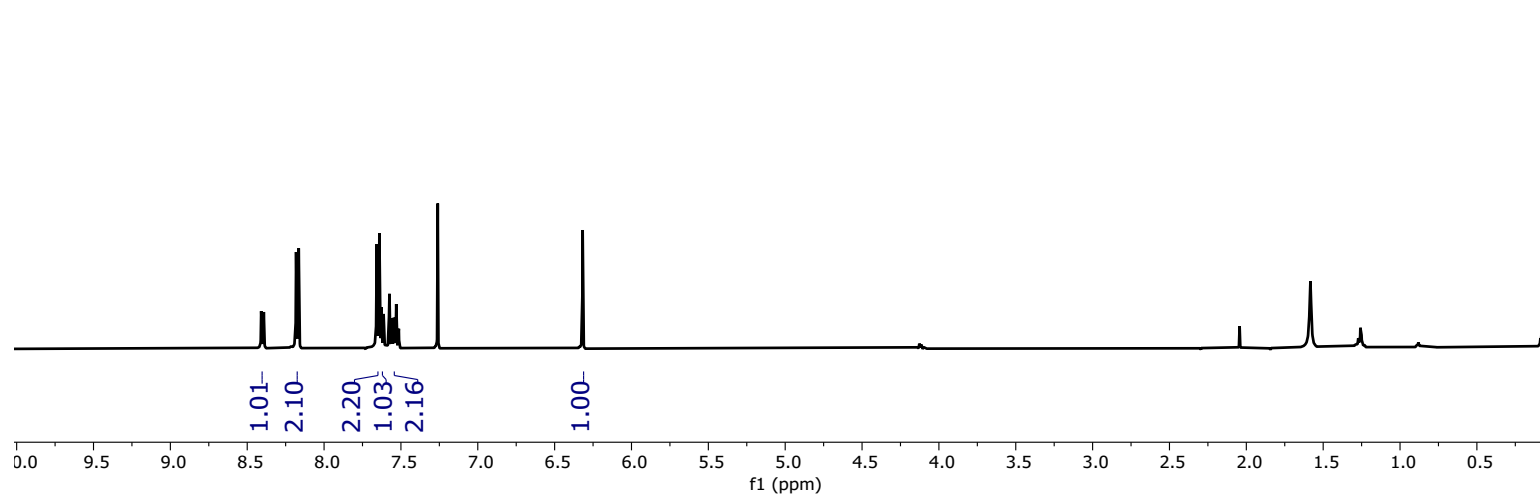

<sup>13</sup>CNMR spectra of compound: 3f

KM-04-4NO2-13C  
KM-04-4NO2-13C

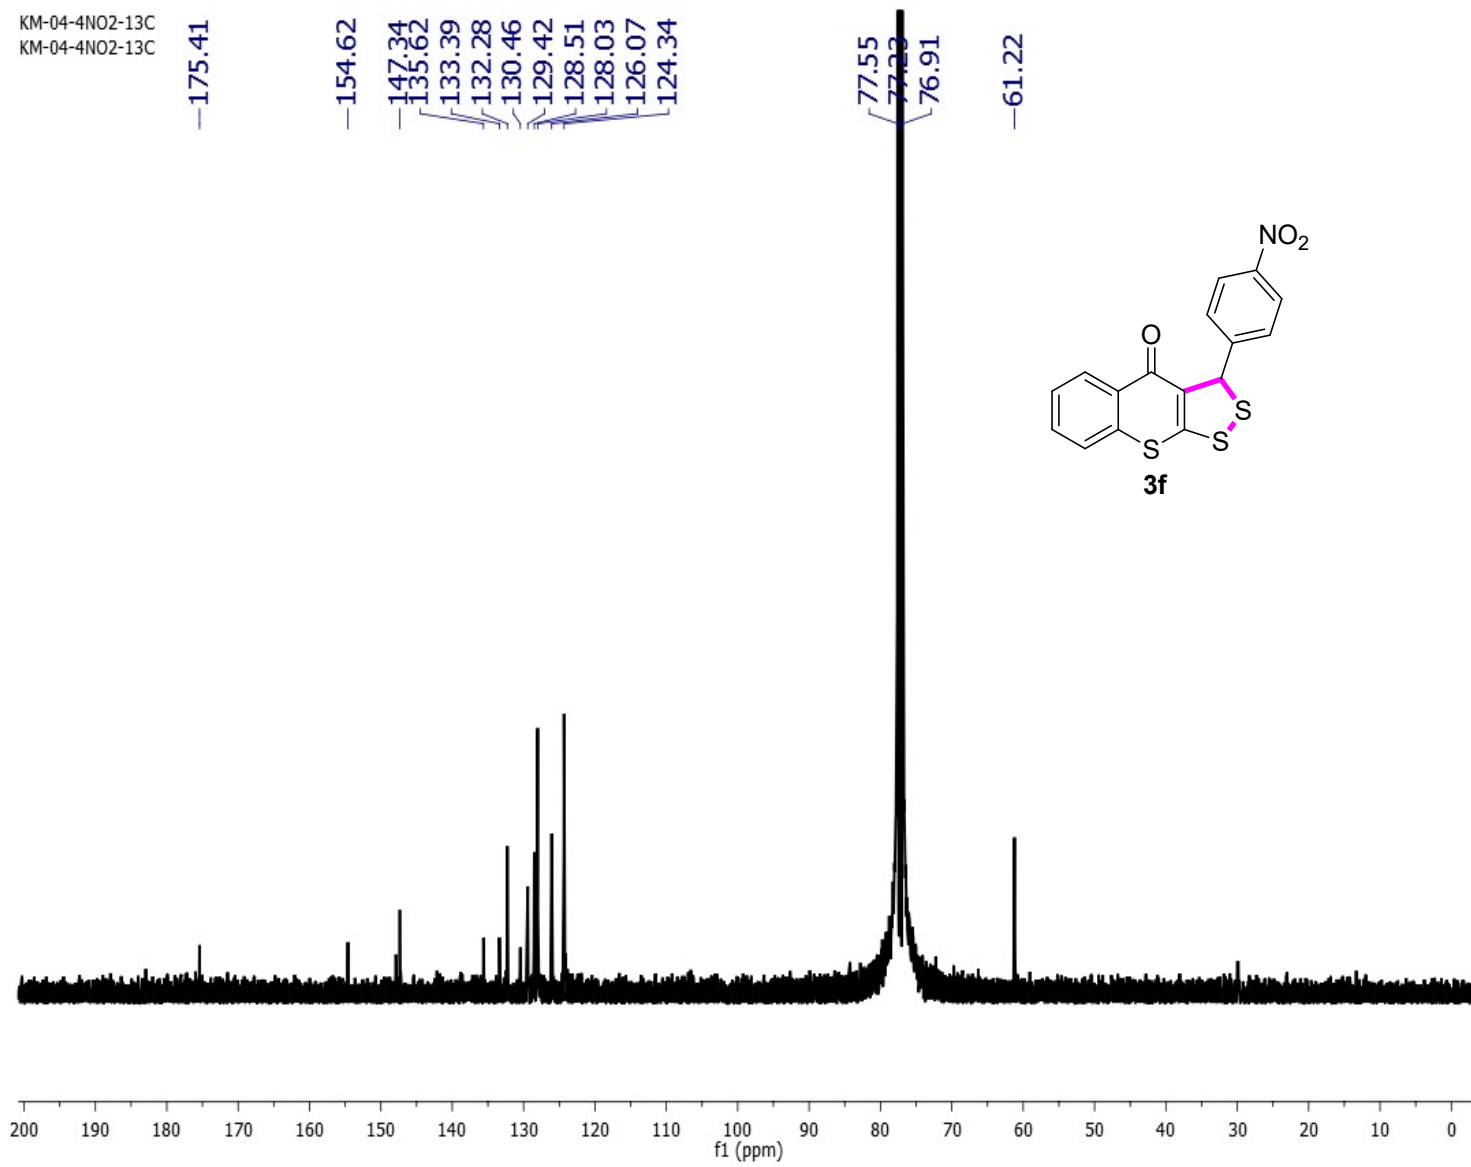

# HRMS spectra of compound: 3f

|               |               |             |        |                 |              |                        |                      |
|---------------|---------------|-------------|--------|-----------------|--------------|------------------------|----------------------|
| Sample Name   | KM-04-4-NO2   | Position    | Vial 1 | Instrument Name | Instrument 1 | User Name              |                      |
| Inj Vol       | 0             | InjPosition |        | SampleType      | Sample       | IRM Calibration Status | Some Ions Missed     |
| Data Filename | KM-04-4-NO2.d | ACQ Method  |        | Comment         |              | Acquired Time          | 5/3/2016 11:47:03 AM |

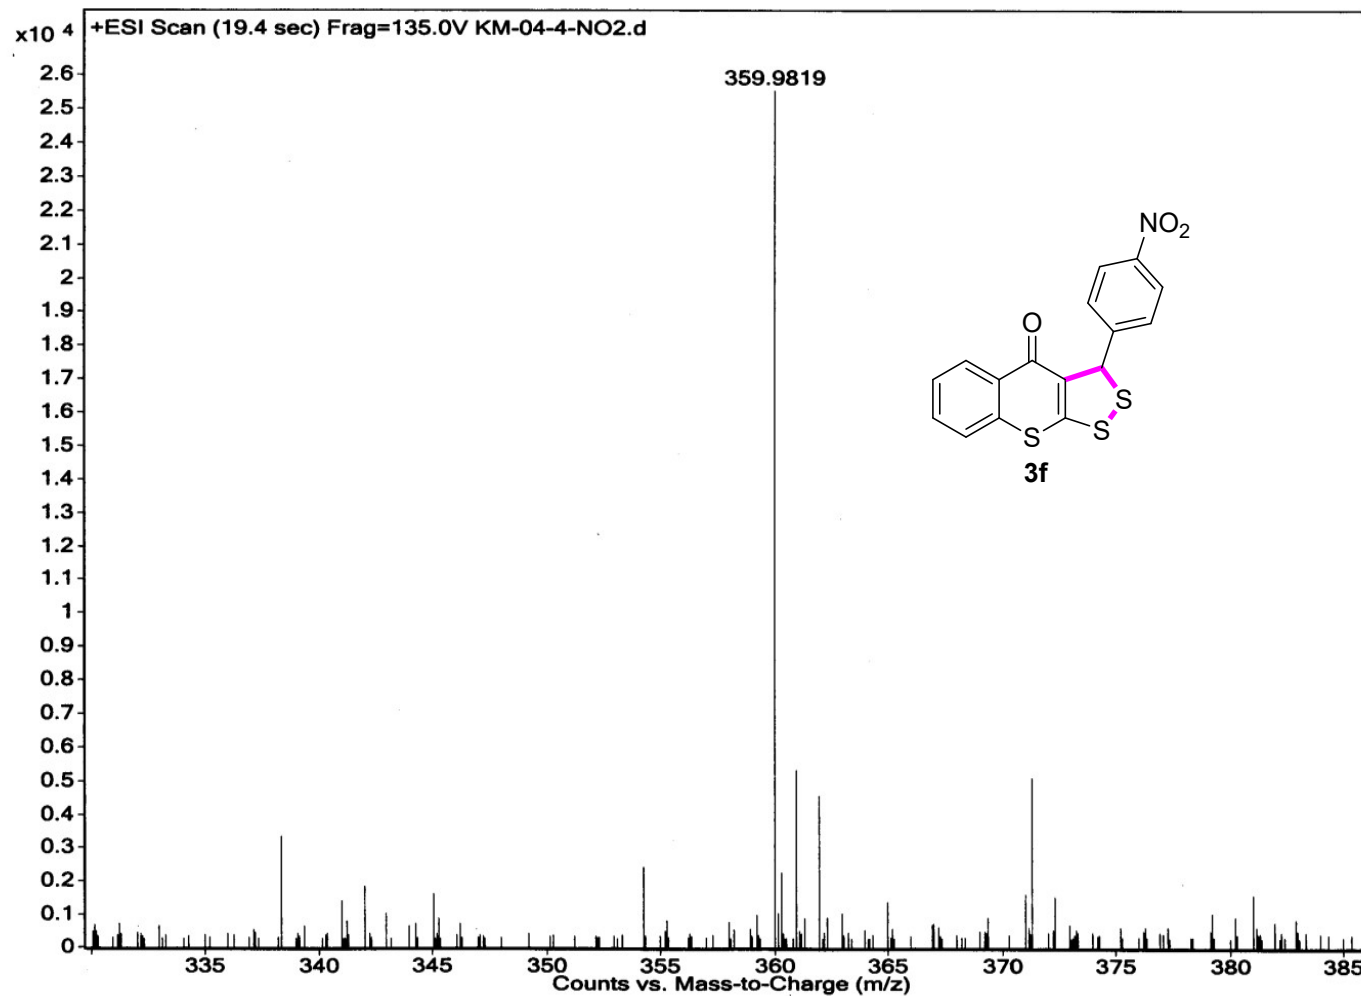



# <sup>1</sup>H NMR spectra of compound: 3g

ATK-G-1H.1.fid  
ATK-G-1H

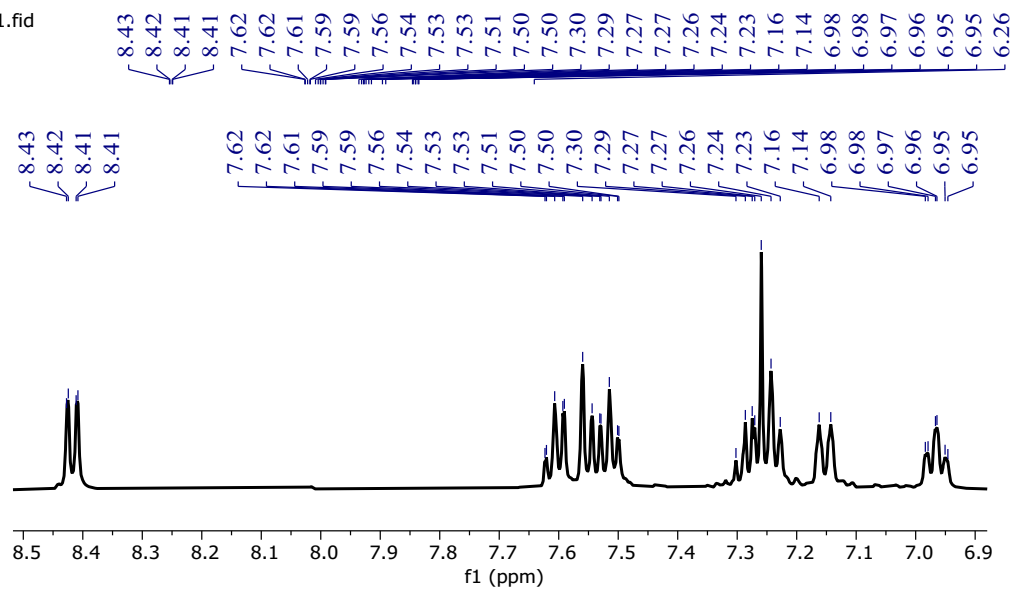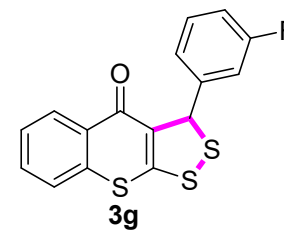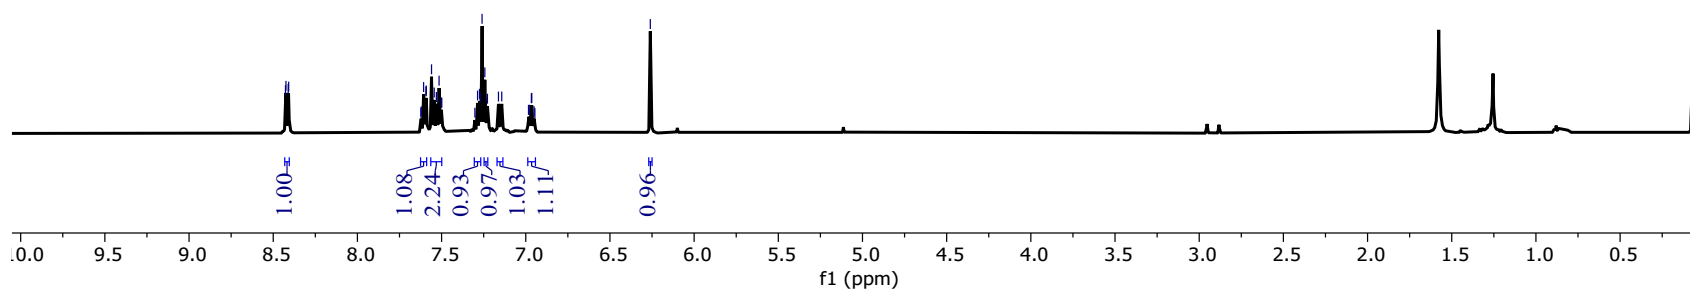

### <sup>13</sup>C NMR spectra of compound: 3g

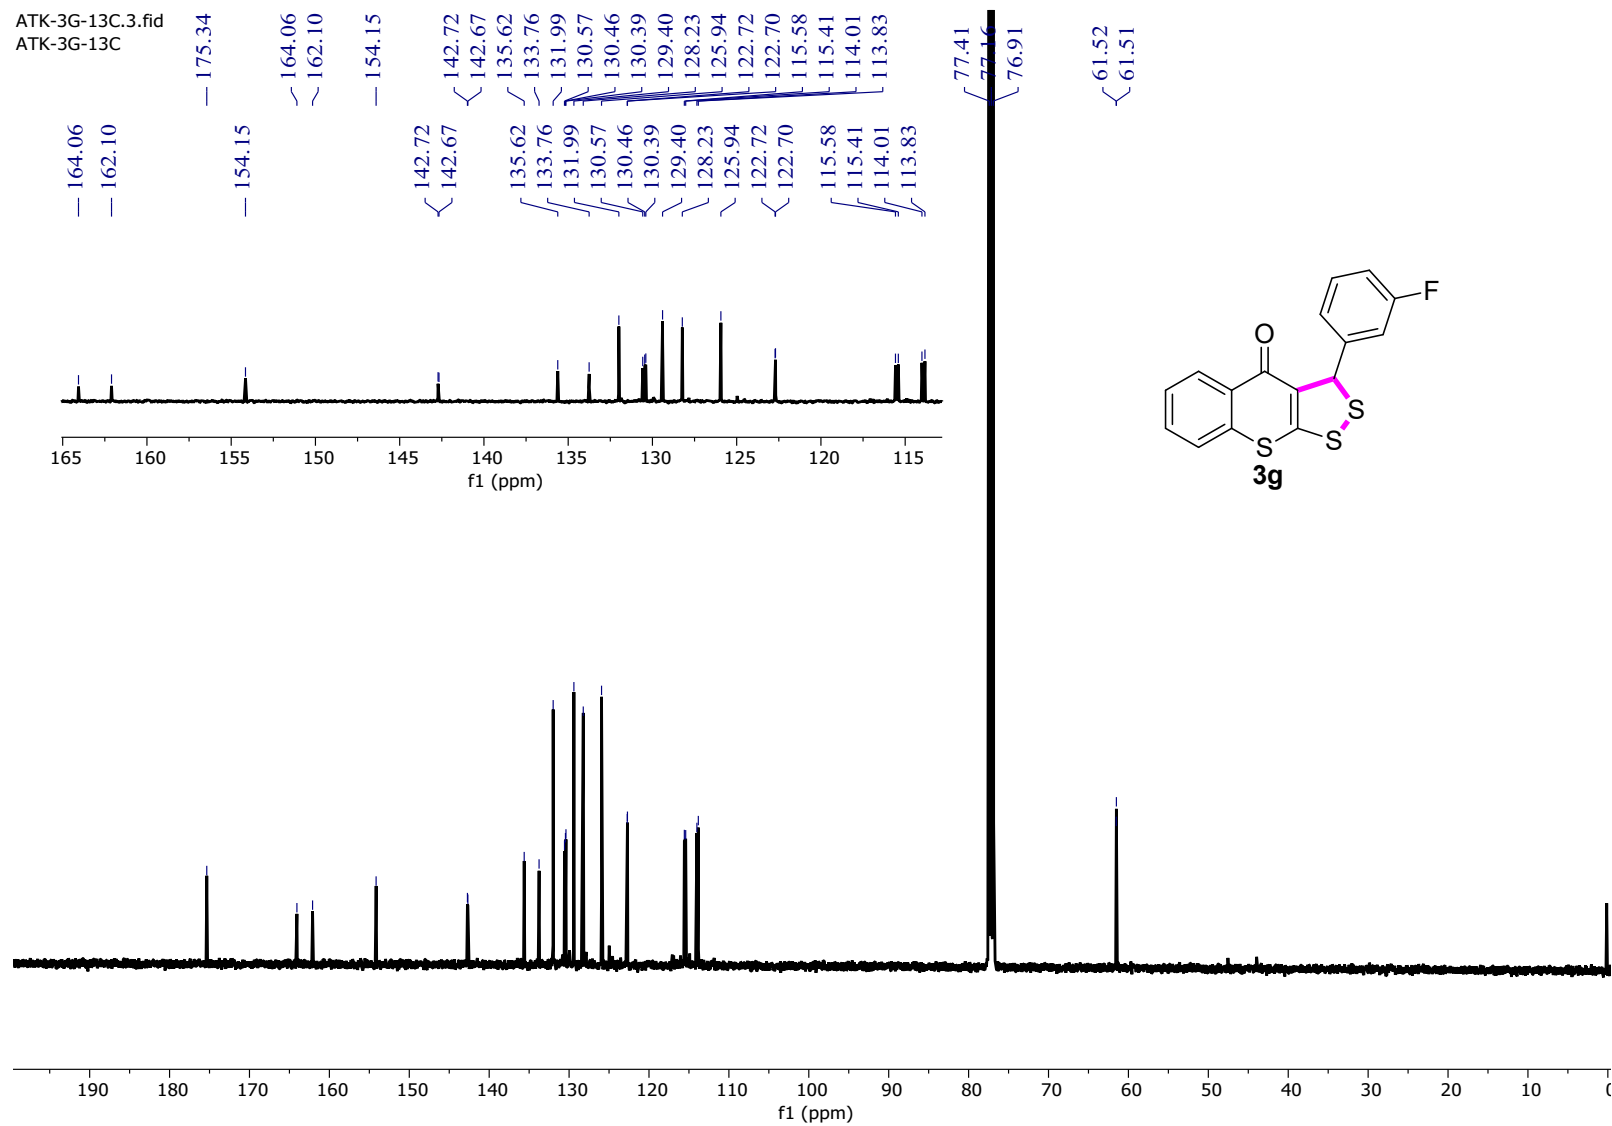

# HRMS spectra of compound: 3g

|                      |            |                    |        |                        |              |                               |                      |
|----------------------|------------|--------------------|--------|------------------------|--------------|-------------------------------|----------------------|
| <b>Sample Name</b>   | KM-04-3F   | <b>Position</b>    | Vial 1 | <b>Instrument Name</b> | Instrument 1 | <b>User Name</b>              |                      |
| <b>Inj Vol</b>       | 0          | <b>InjPosition</b> |        | <b>SampleType</b>      | Sample       | <b>IRM Calibration Status</b> | Some Ions Missed     |
| <b>Data Filename</b> | KM-04-3F.d | <b>ACQ Method</b>  |        | <b>Comment</b>         |              | <b>Acquired Time</b>          | 1/24/2017 3:50:45 PM |

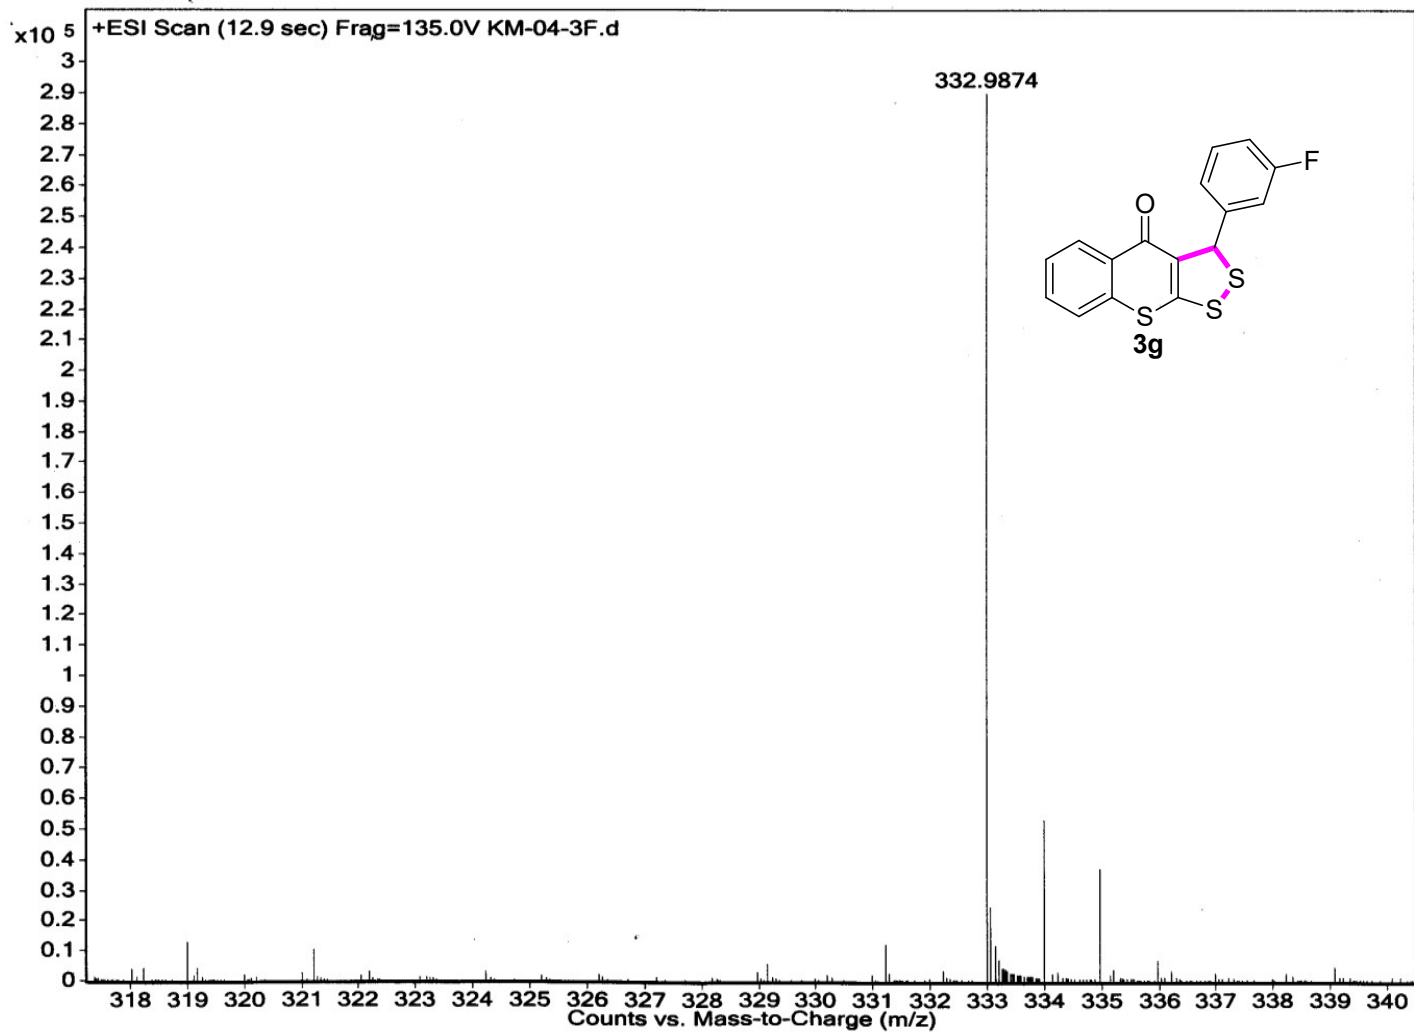

# <sup>1</sup>H NMR spectra of compound: 3h

DT-2-CL-1H.1.fid  
DT-2-CL-1H

8.44  
8.42  
7.65  
7.65  
7.63  
7.62  
7.62  
7.59  
7.58  
7.58  
7.55  
7.55  
7.54  
7.52  
7.52  
7.48  
7.46  
7.26  
7.25  
7.25  
7.24  
7.23  
7.23  
7.22  
7.21  
7.16  
7.15  
7.14  
7.14  
7.12  
7.12  
6.99  
6.99  
6.98  
6.98  
6.61

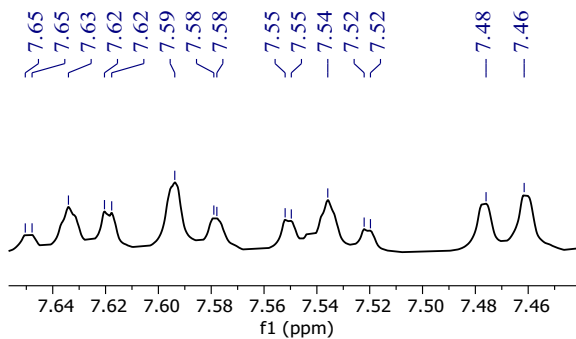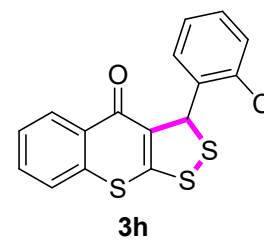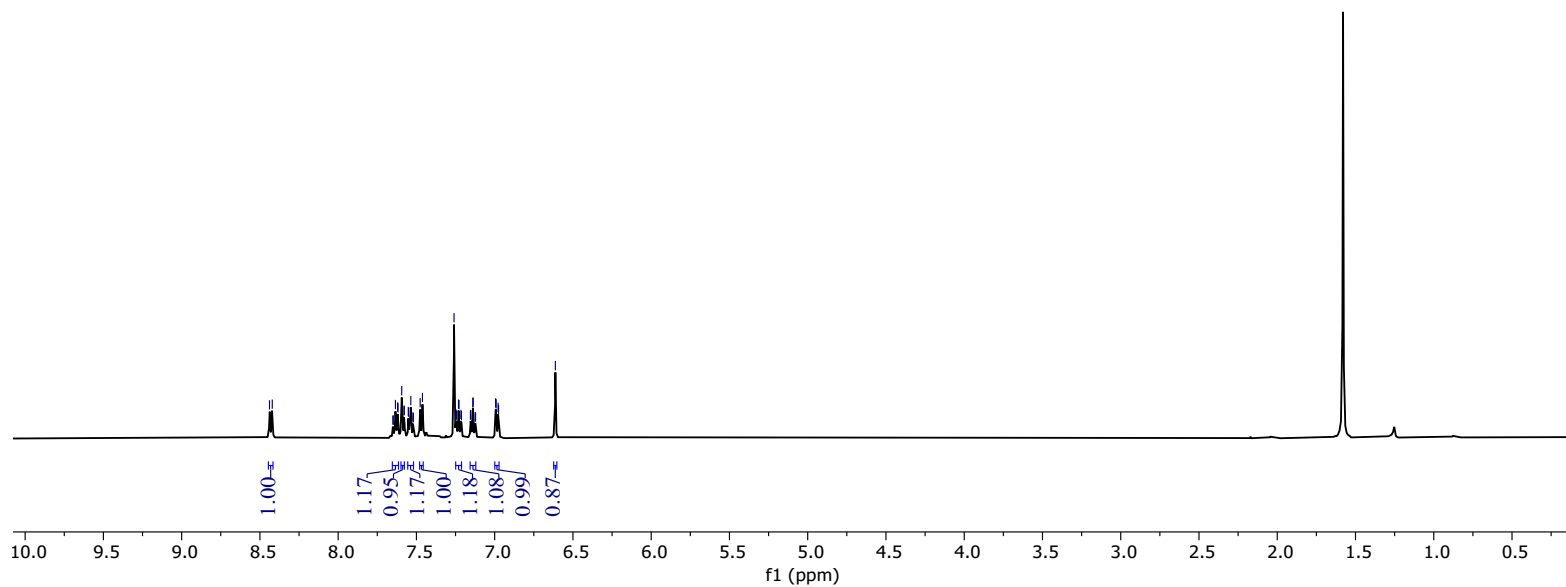

### <sup>13</sup>CNMR spectra of compound: 3h

DT-2-CL-13C.3.fid  
DT-2-CL-13C

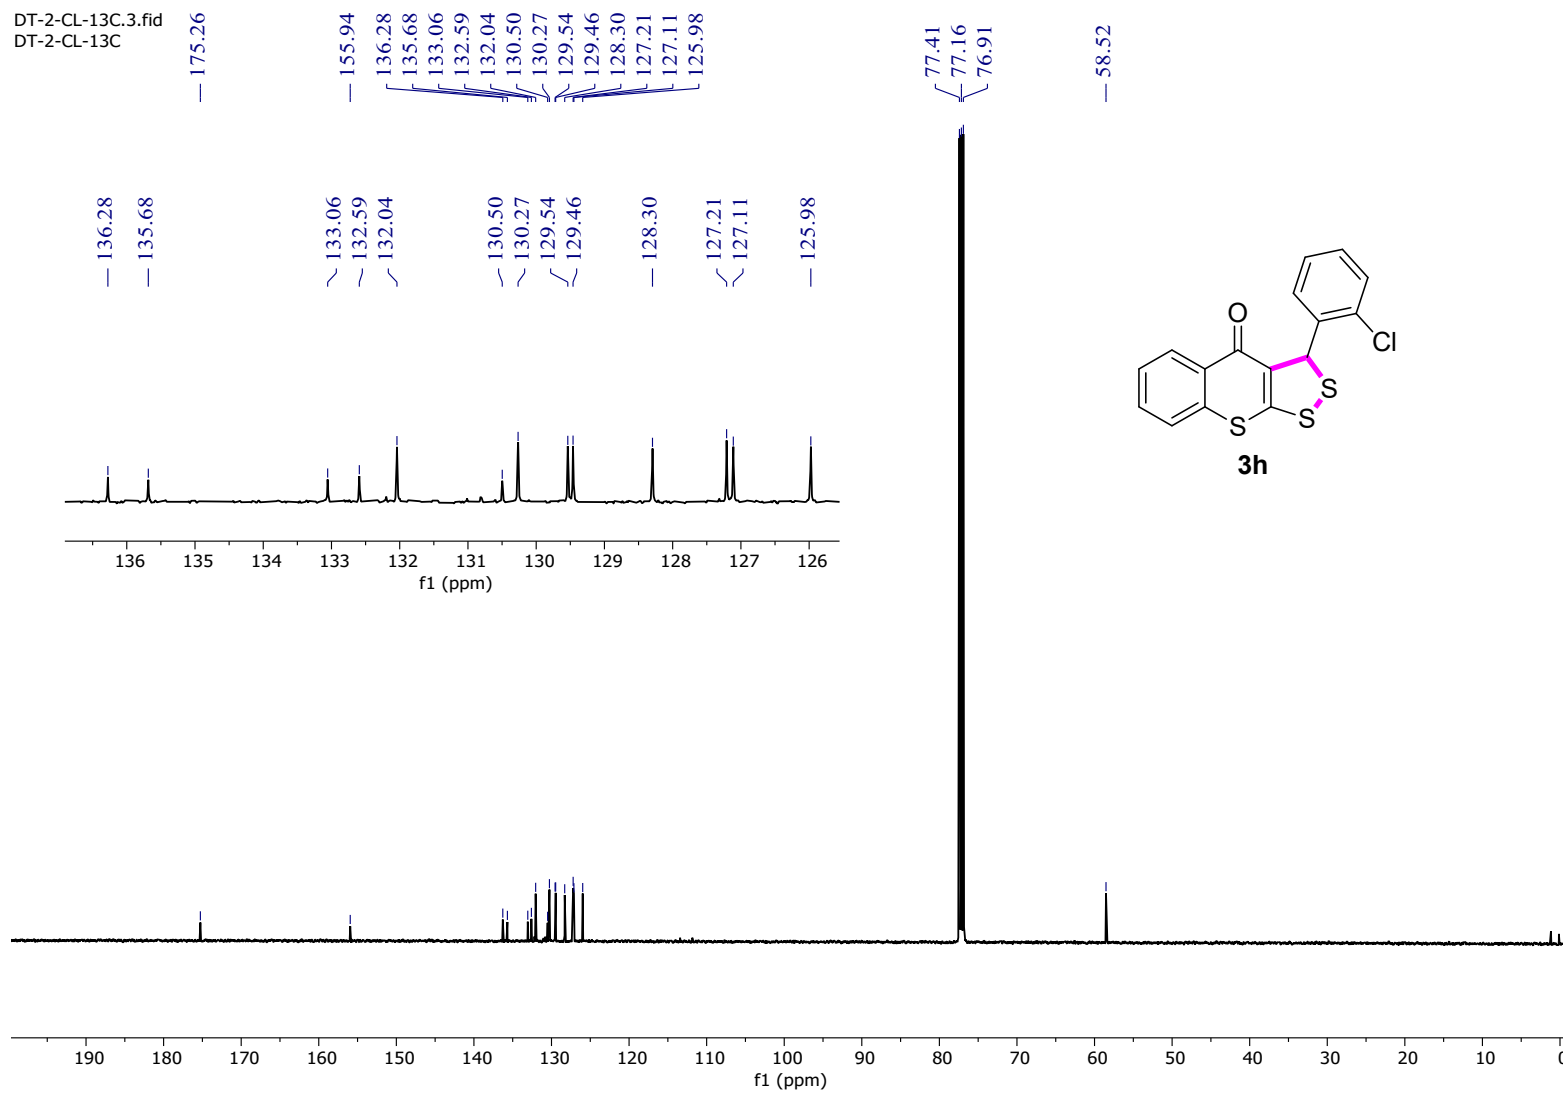

# HRMS spectra of compound: 3h

|                      |              |                    |        |                        |              |                               |                      |
|----------------------|--------------|--------------------|--------|------------------------|--------------|-------------------------------|----------------------|
| <b>Sample Name</b>   | KM-04-2-Cl   | <b>Position</b>    | Vial 1 | <b>Instrument Name</b> | Instrument 1 | <b>User Name</b>              |                      |
| <b>Inj Vol</b>       | 0            | <b>InjPosition</b> |        | <b>SampleType</b>      | Sample       | <b>IRM Calibration Status</b> | Some Ions Missed     |
| <b>Data Filename</b> | KM-04-2-Cl.d | <b>ACQ Method</b>  |        | <b>Comment</b>         |              | <b>Acquired Time</b>          | 1/24/2017 3:47:45 PM |

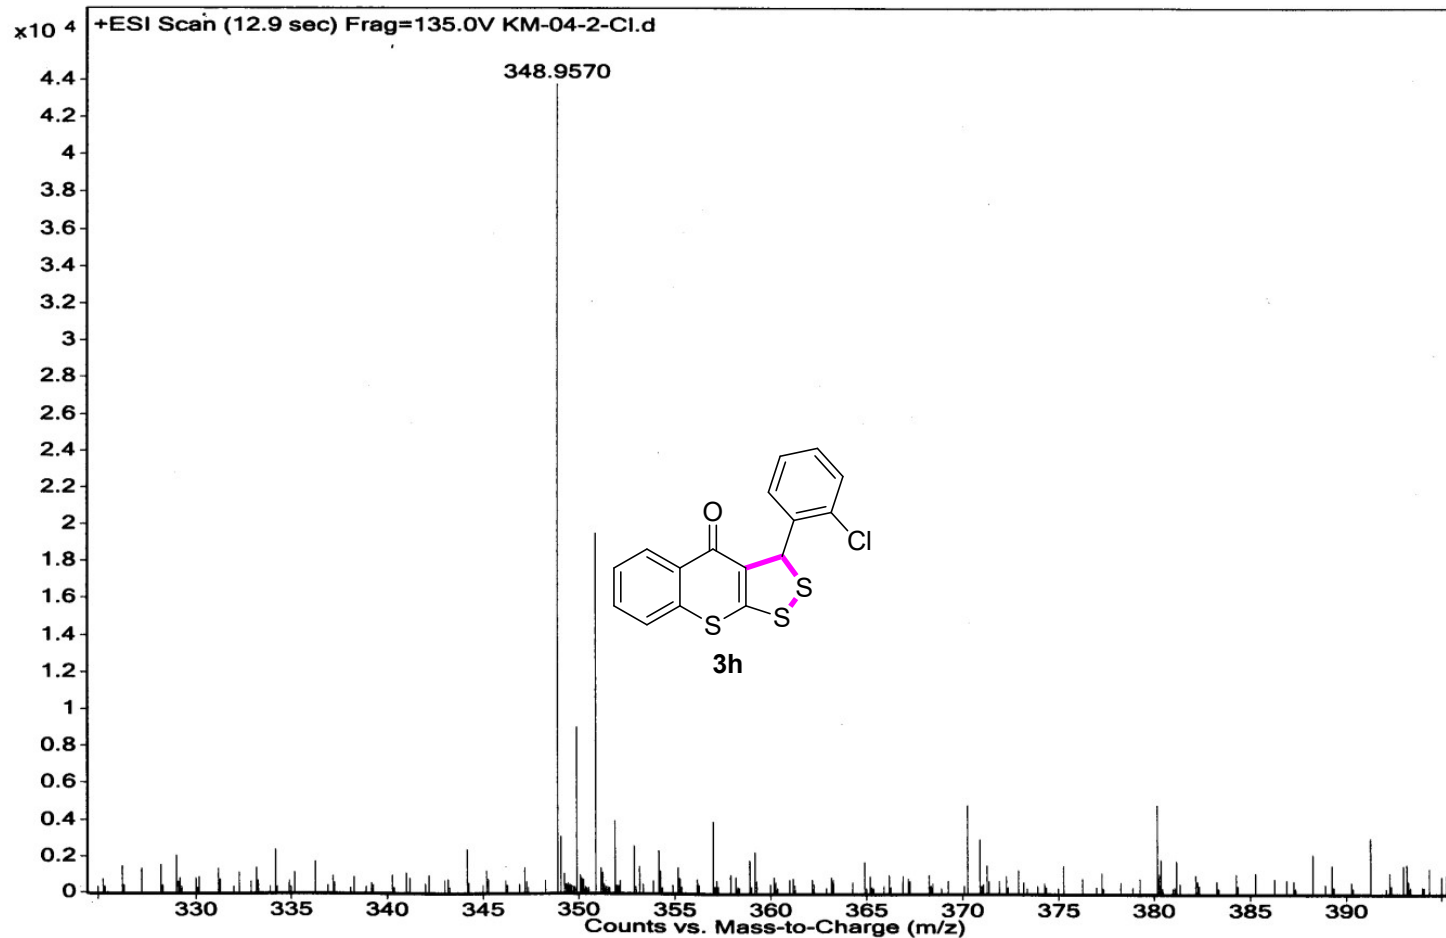

### <sup>1</sup>HNMR spectra of compound: 3i

4CL-DTQ-2CL-1H-A.1.fig  
4CL-DTQ-2CL-1H-A

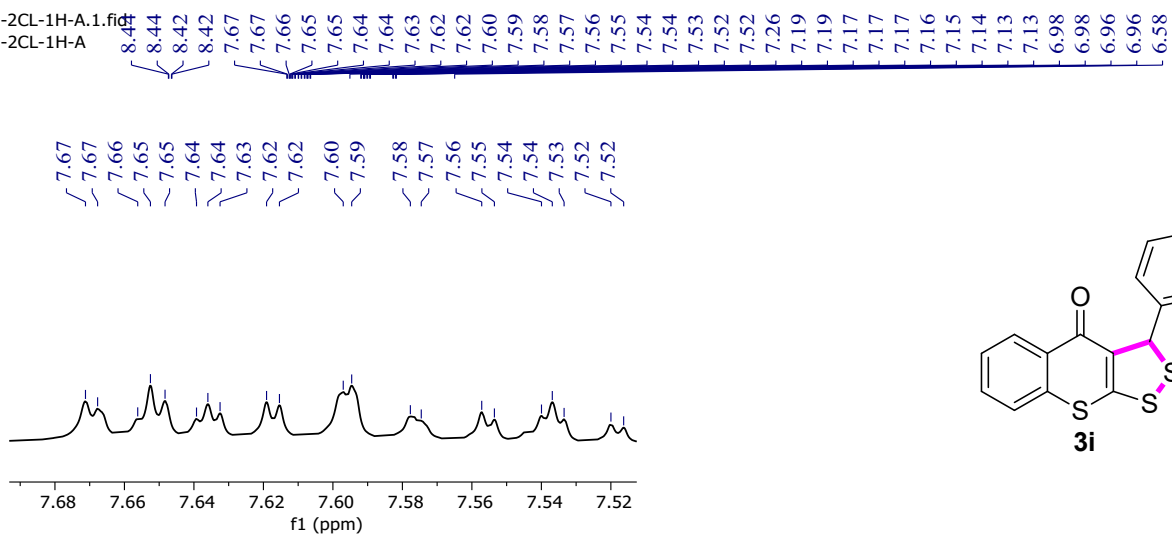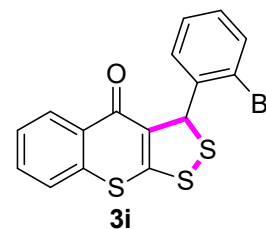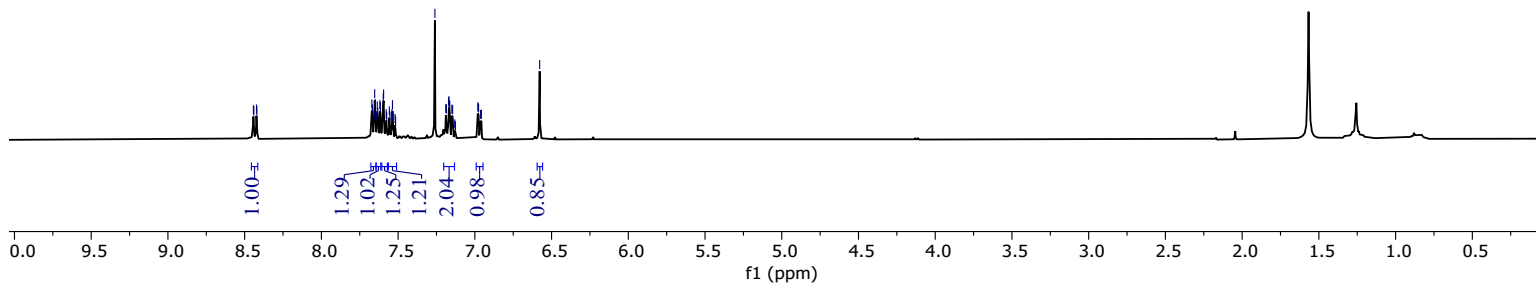

### <sup>13</sup>CNMR spectra of compound: 3i

KM-04-2Br-13C

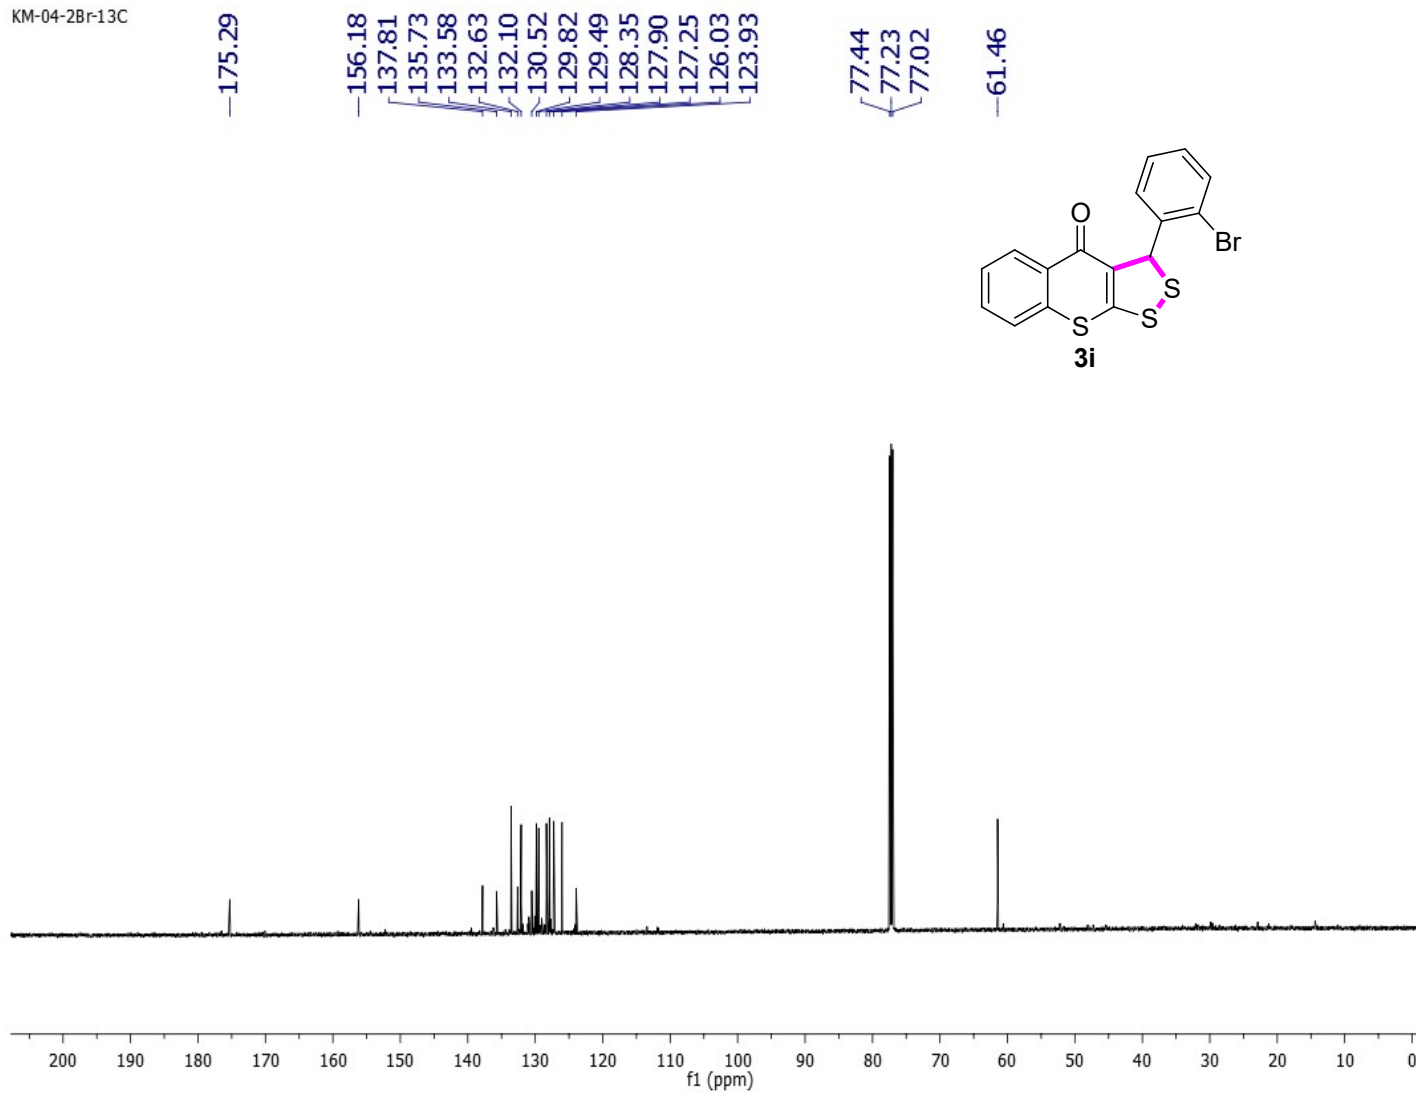



# HRMS spectra of compound: 3i

|               |             |             |             |                 |                                   |                        |                 |
|---------------|-------------|-------------|-------------|-----------------|-----------------------------------|------------------------|-----------------|
| Sample Name   | Unavailable | Position    | Unavailable | Instrument Name | Unavailable                       | User Name              | Unavailable     |
| Inj Vol       | Unavailable | InjPosition | Unavailable | SampleType      | Unavailable                       | IRM Calibration Status | All Ions Missed |
| Data Filename | KM-04-2BR.d | ACQ Method  |             | Comment         | Sample information is unavailable | Acquired Time          | Unavailable     |

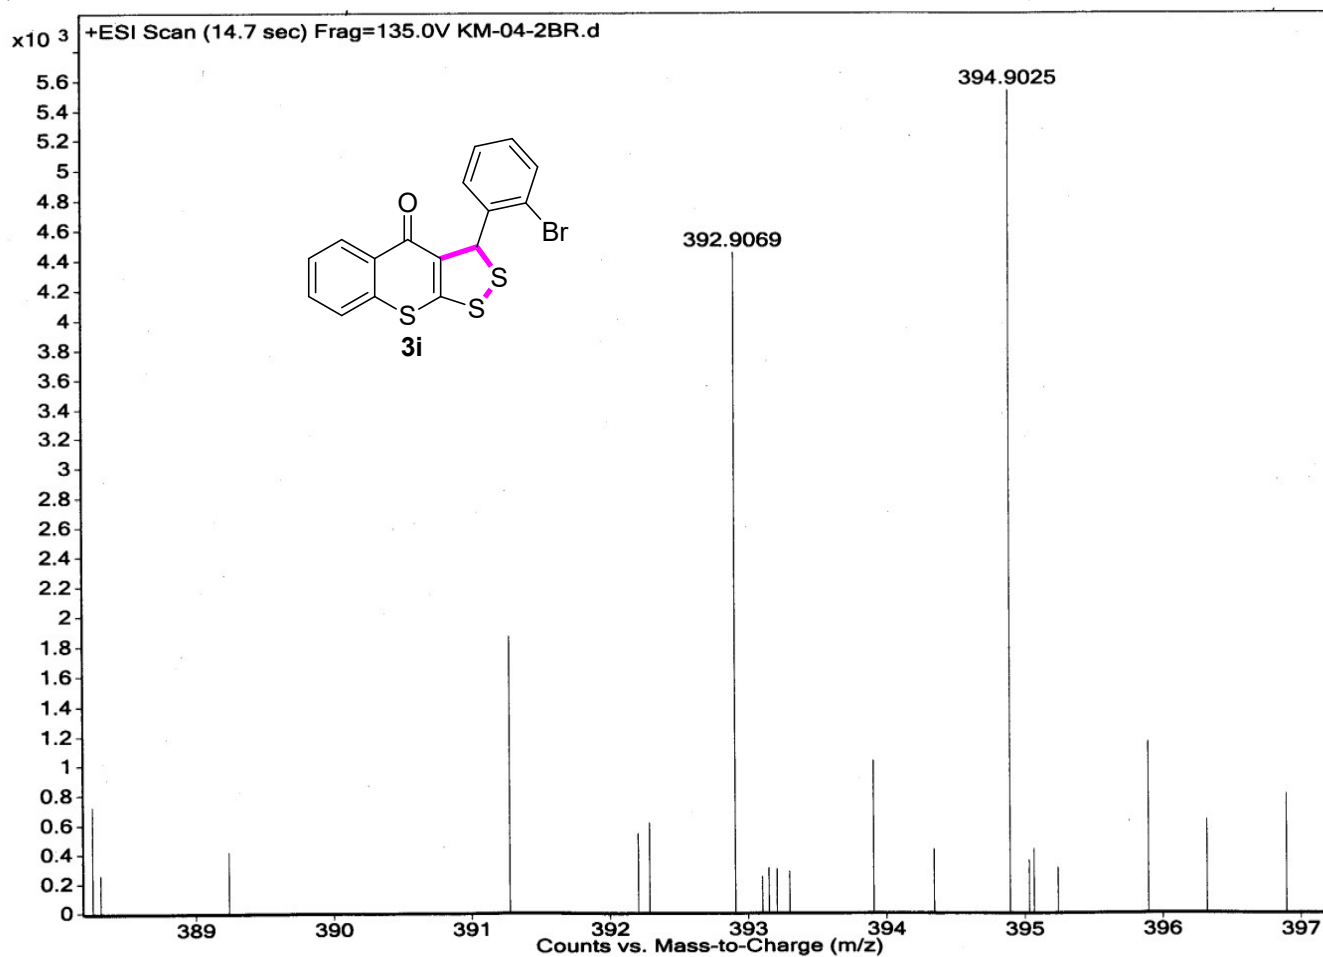

# <sup>1</sup>H NMR spectra of compound: 3j

ATK-J-1H.15.fid  
ATK-J-1H

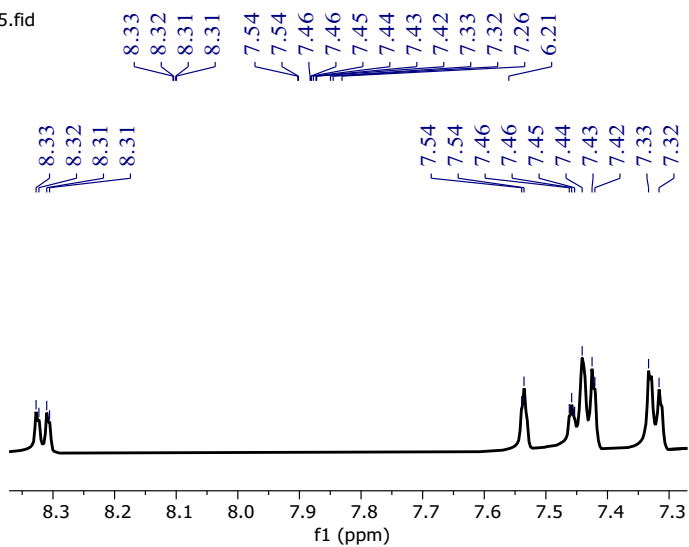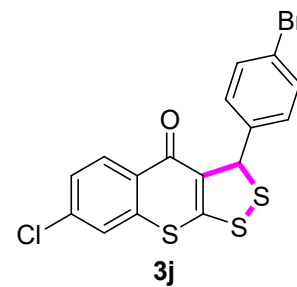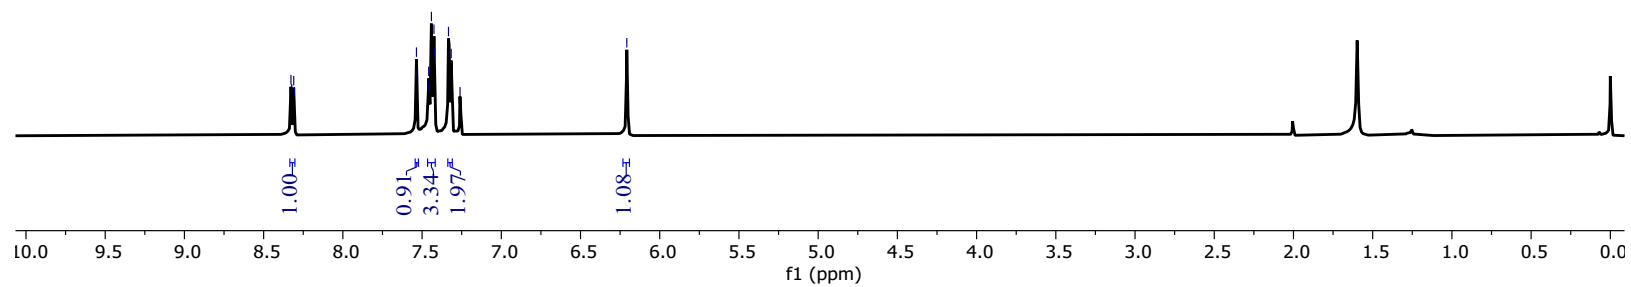

# <sup>13</sup>C NMR spectra of compound: 3j

ATK-J-13C.17.fid  
ATK-J-13C

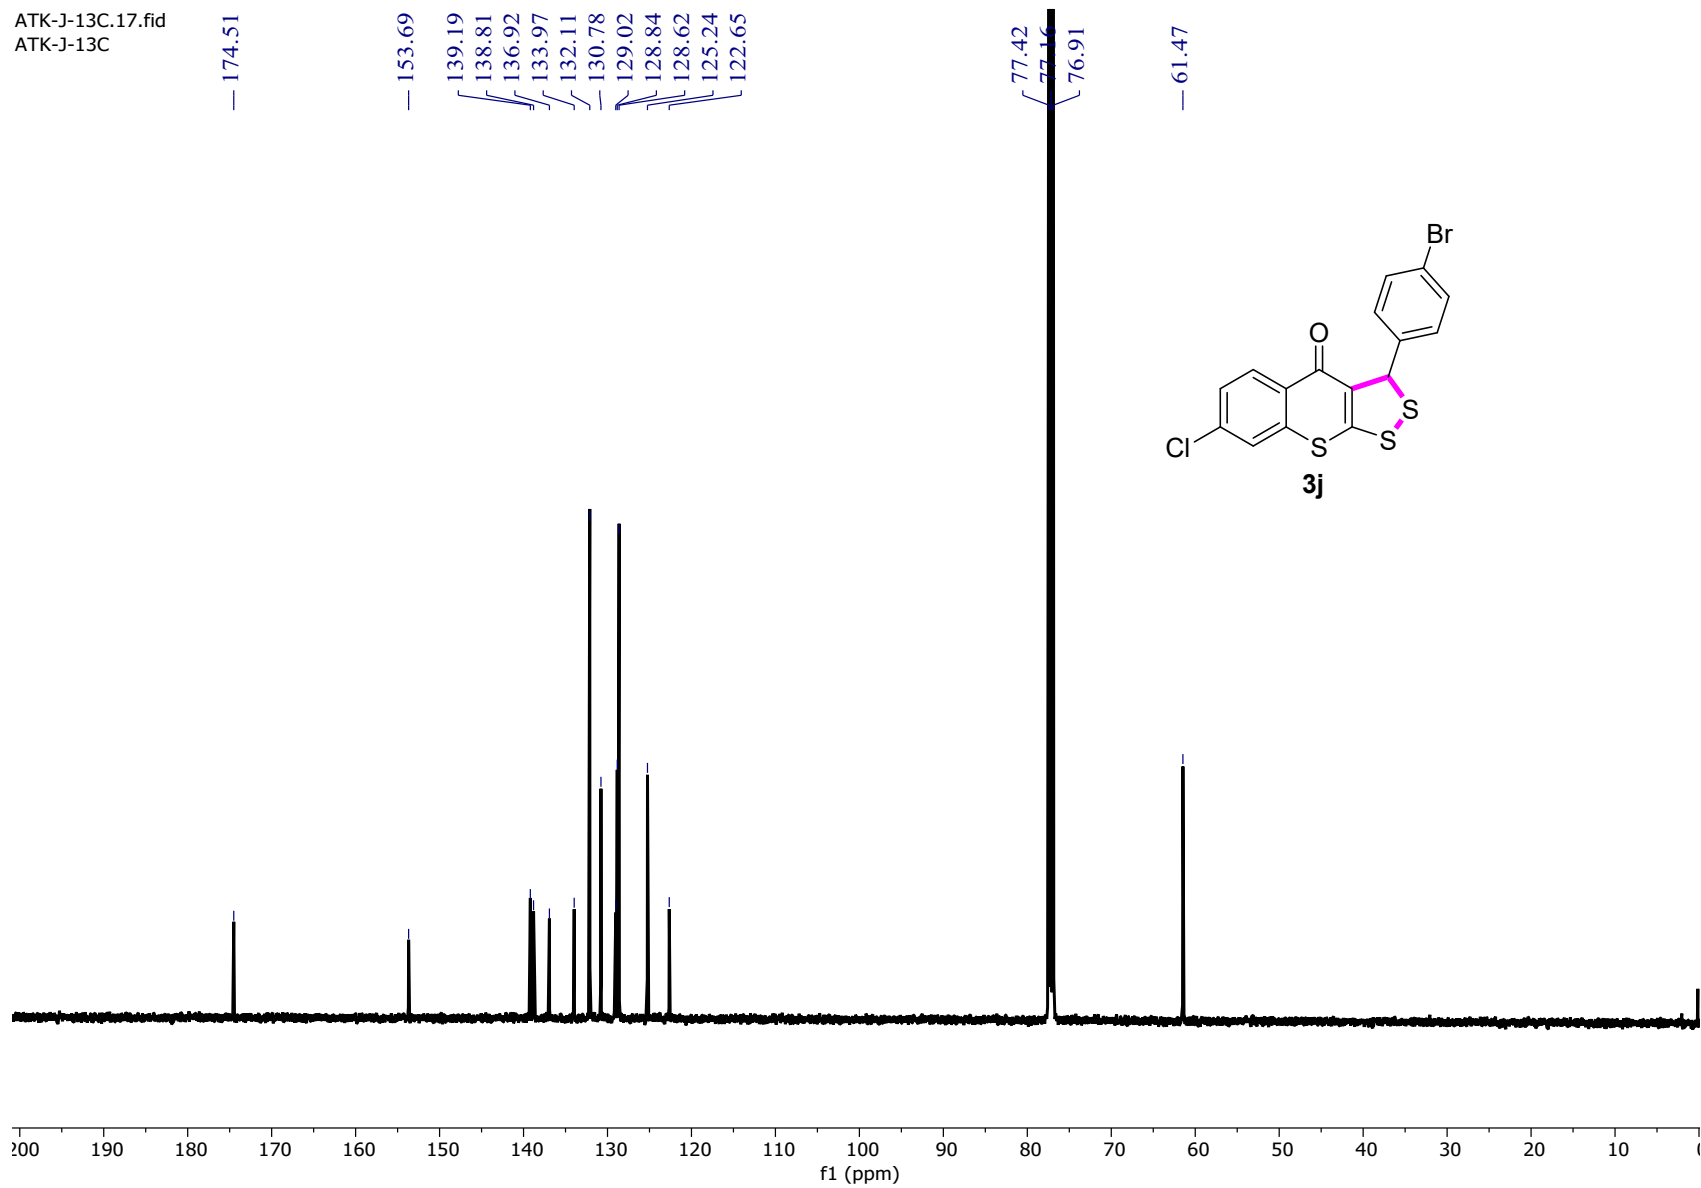

# HRMS spectra of compound: 3j

|               |              |             |        |                 |              |                        |                  |
|---------------|--------------|-------------|--------|-----------------|--------------|------------------------|------------------|
| Sample Name   | KM-04-4.Br   | Position    | Vial 1 | Instrument Name | Instrument 1 | User Name              |                  |
| Inj Vol       | 0            | InjPosition |        | SampleType      | Sample       | IRM Calibration Status | Some Ions Missed |
| Data Filename | KM-04-4.Br.d | ACQ Method  |        | Comment         |              | Acquired Time          |                  |

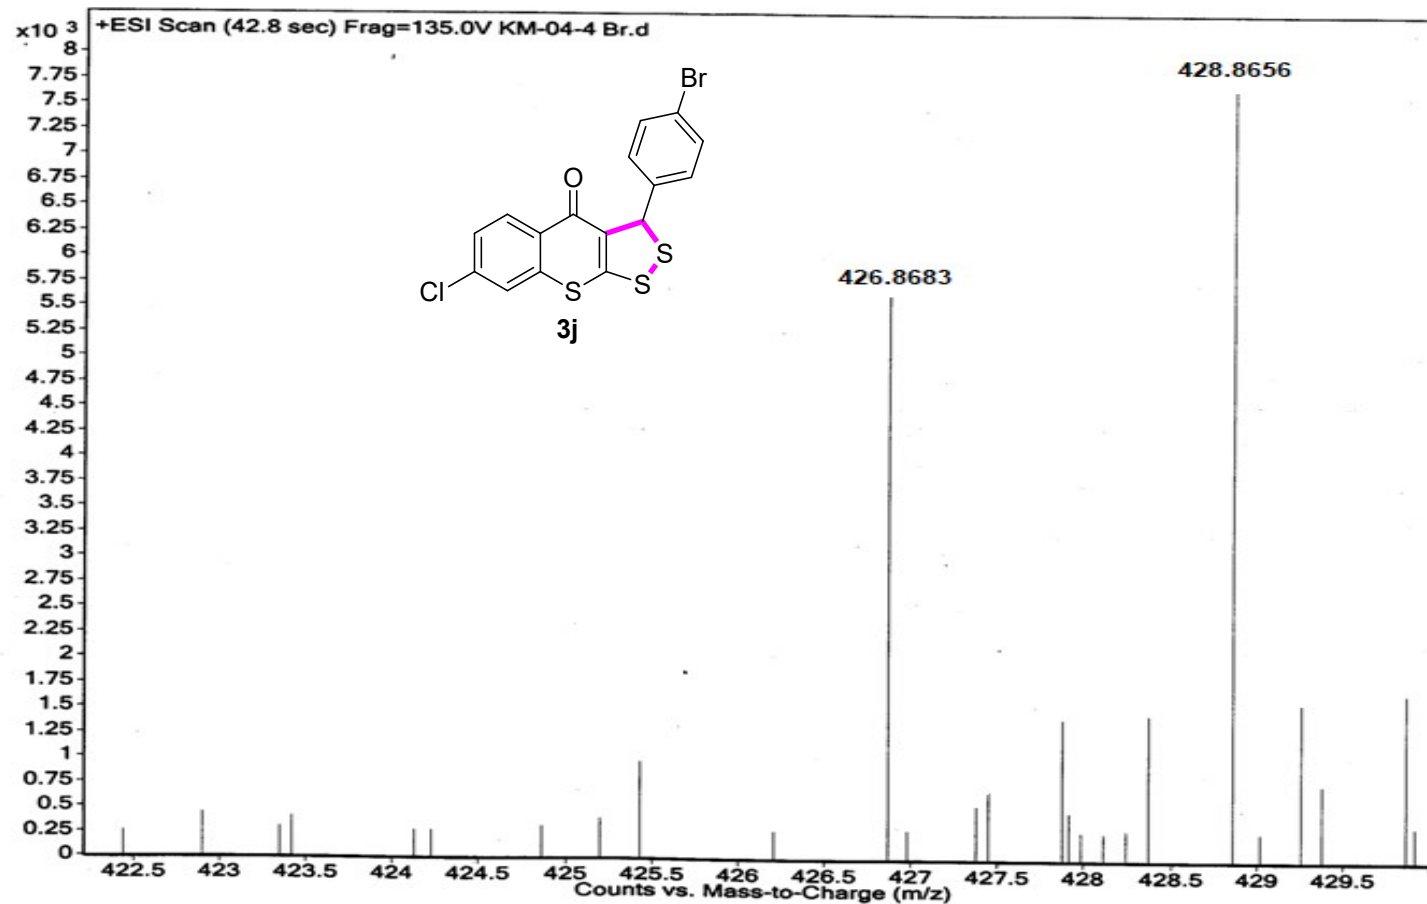

# <sup>1</sup>H NMR spectra of compound: 3k

ATK-K-82-1H.1.fid  
ATK-K-82-1H

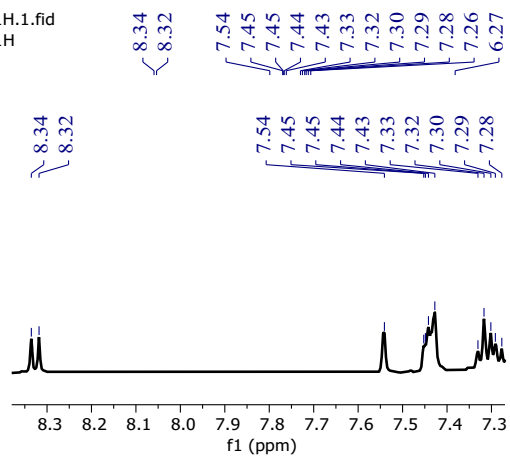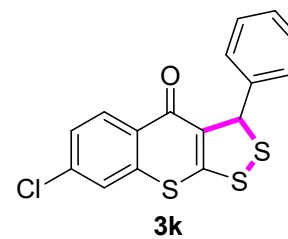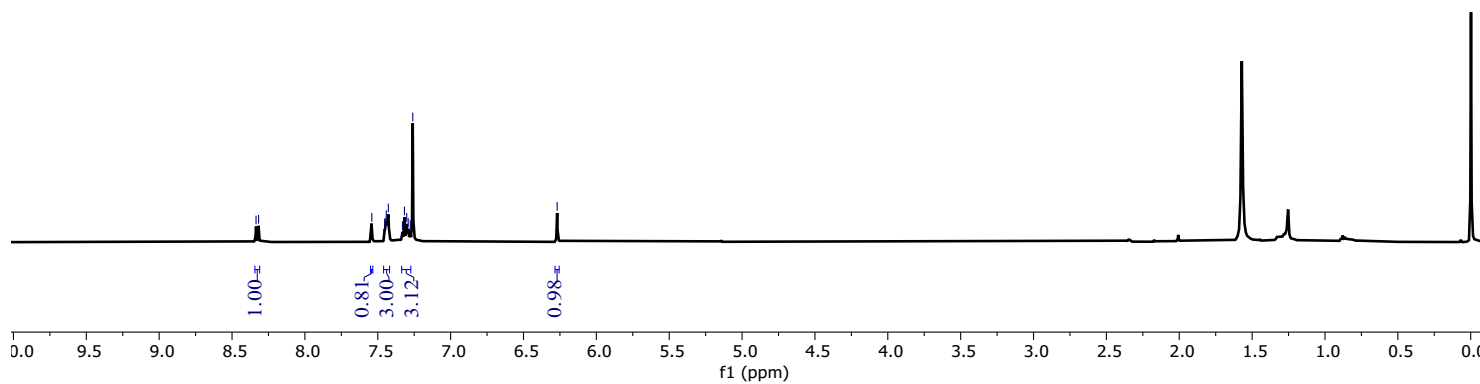

### <sup>13</sup>CNMR spectra of compound: 3k

ATK-K-BZ-13C.3.fid  
ATK-K-BZ-13C

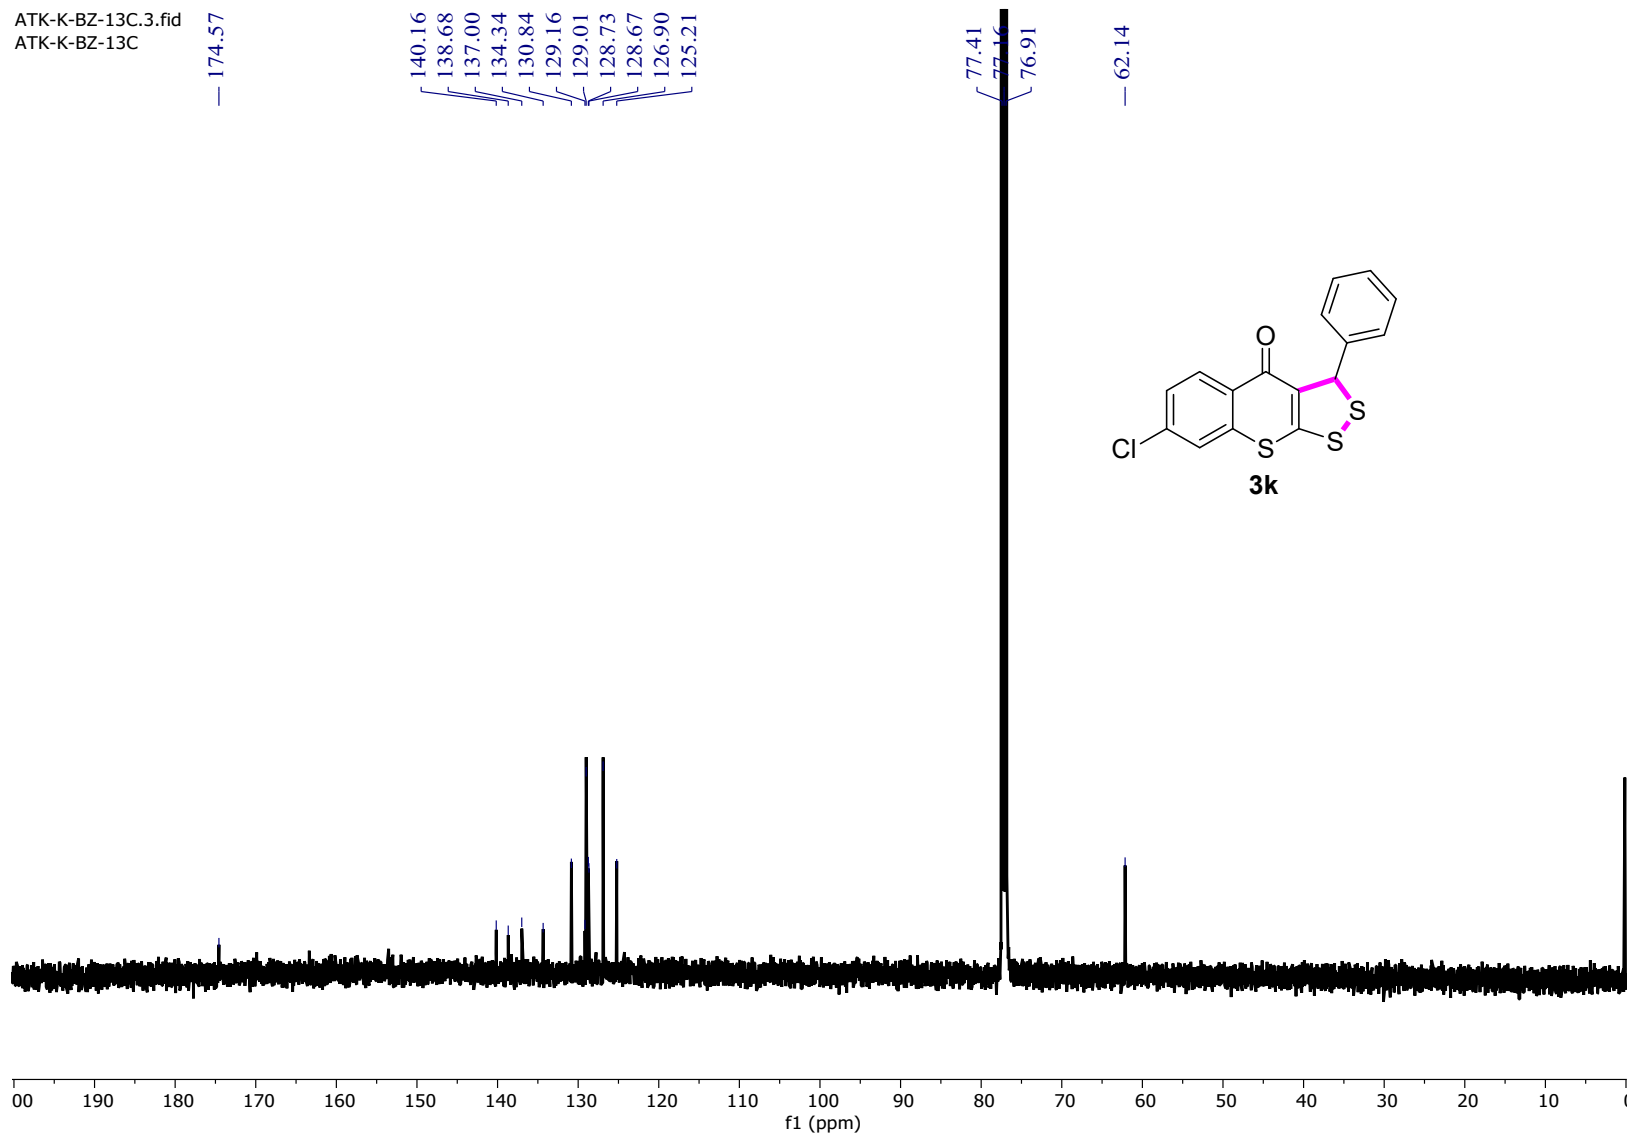

# HRMS spectra of compound: 3k

|               |               |             |        |                 |              |                        |                      |
|---------------|---------------|-------------|--------|-----------------|--------------|------------------------|----------------------|
| Sample Name   | KM-04-4-BEN   | Position    | Vial 1 | Instrument Name | Instrument 1 | User Name              |                      |
| Inj Vol       | 0             | InjPosition |        | SampleType      | Sample       | IRM Calibration Status | Some Ions Missed     |
| Data Filename | KM-04-4-BEN.d | ACQ Method  |        | Comment         |              | Acquired Time          | 5/3/2016 11:43:46 AM |

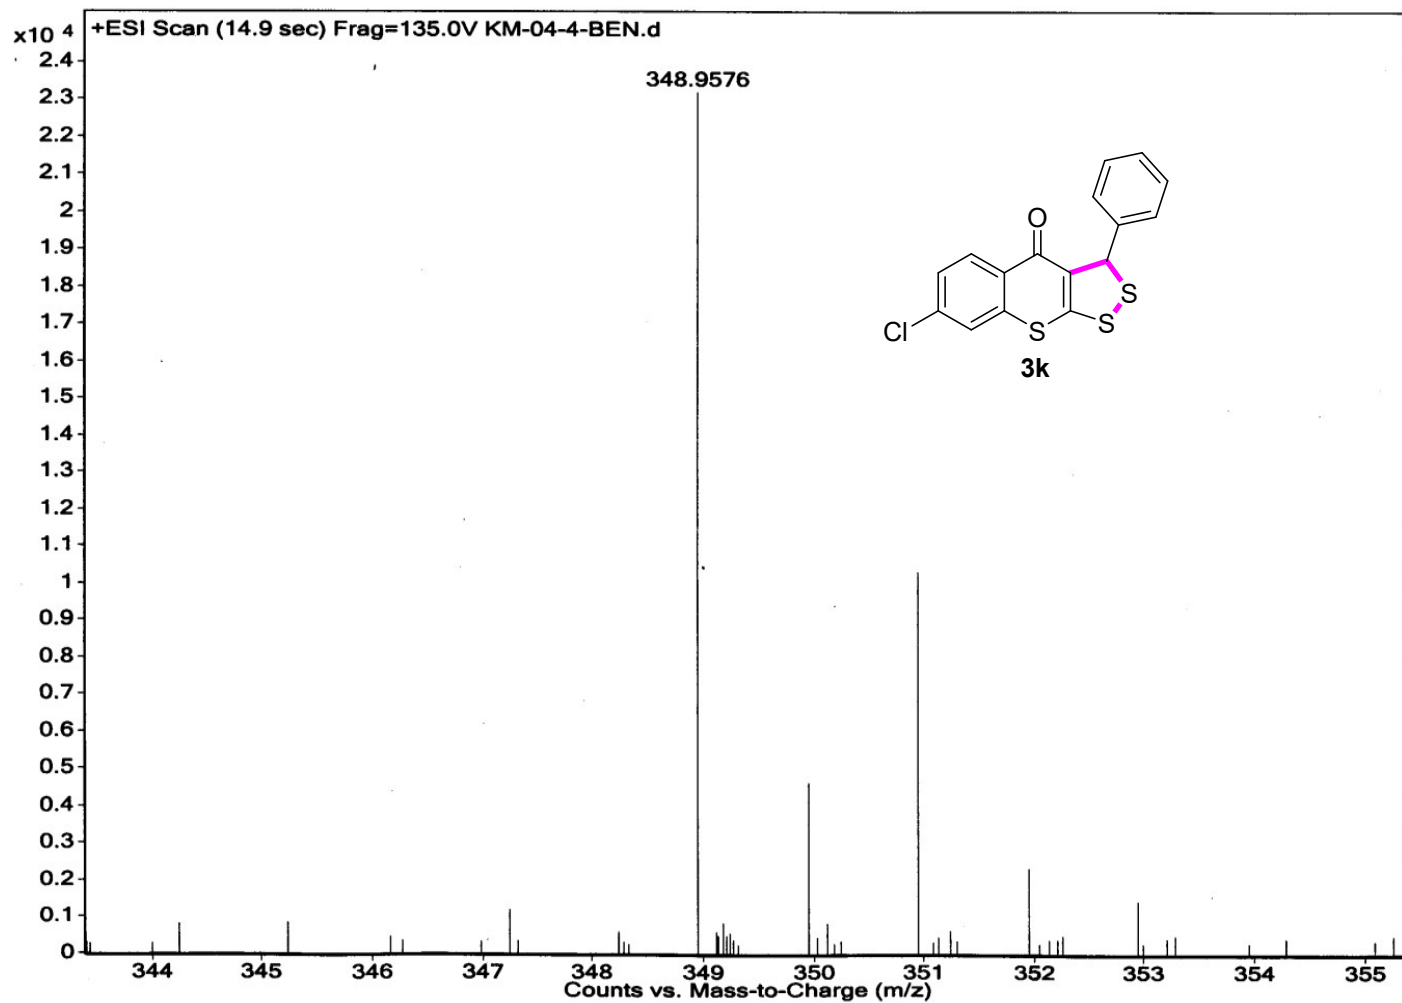

# <sup>1</sup>H NMR spectra of compound: 31

KM33

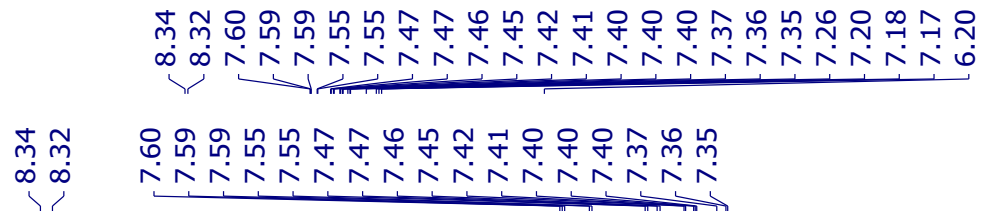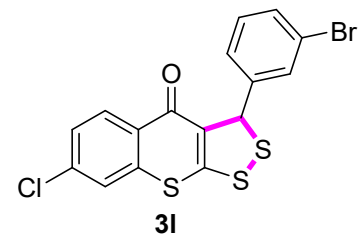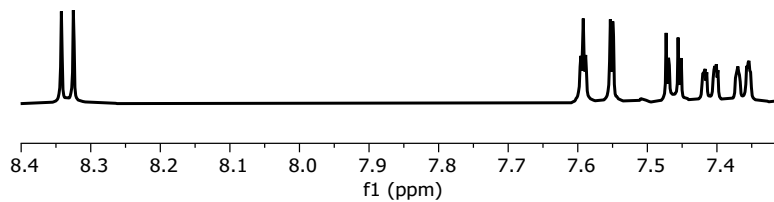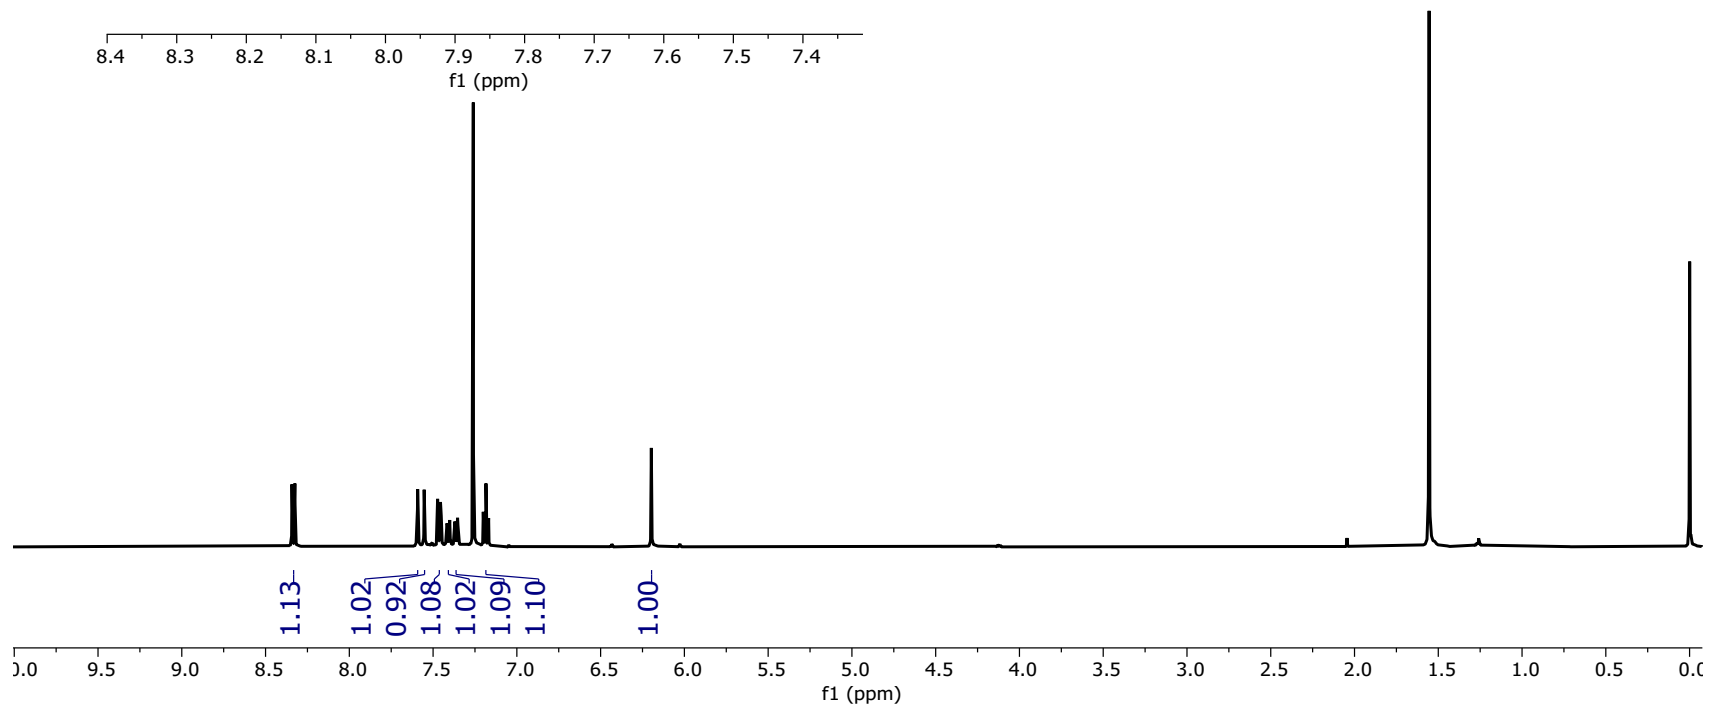



### <sup>13</sup>CNMR spectra of compound: 31

KM-04-4-3BR-13C  
KM-04-4-3BR-13C

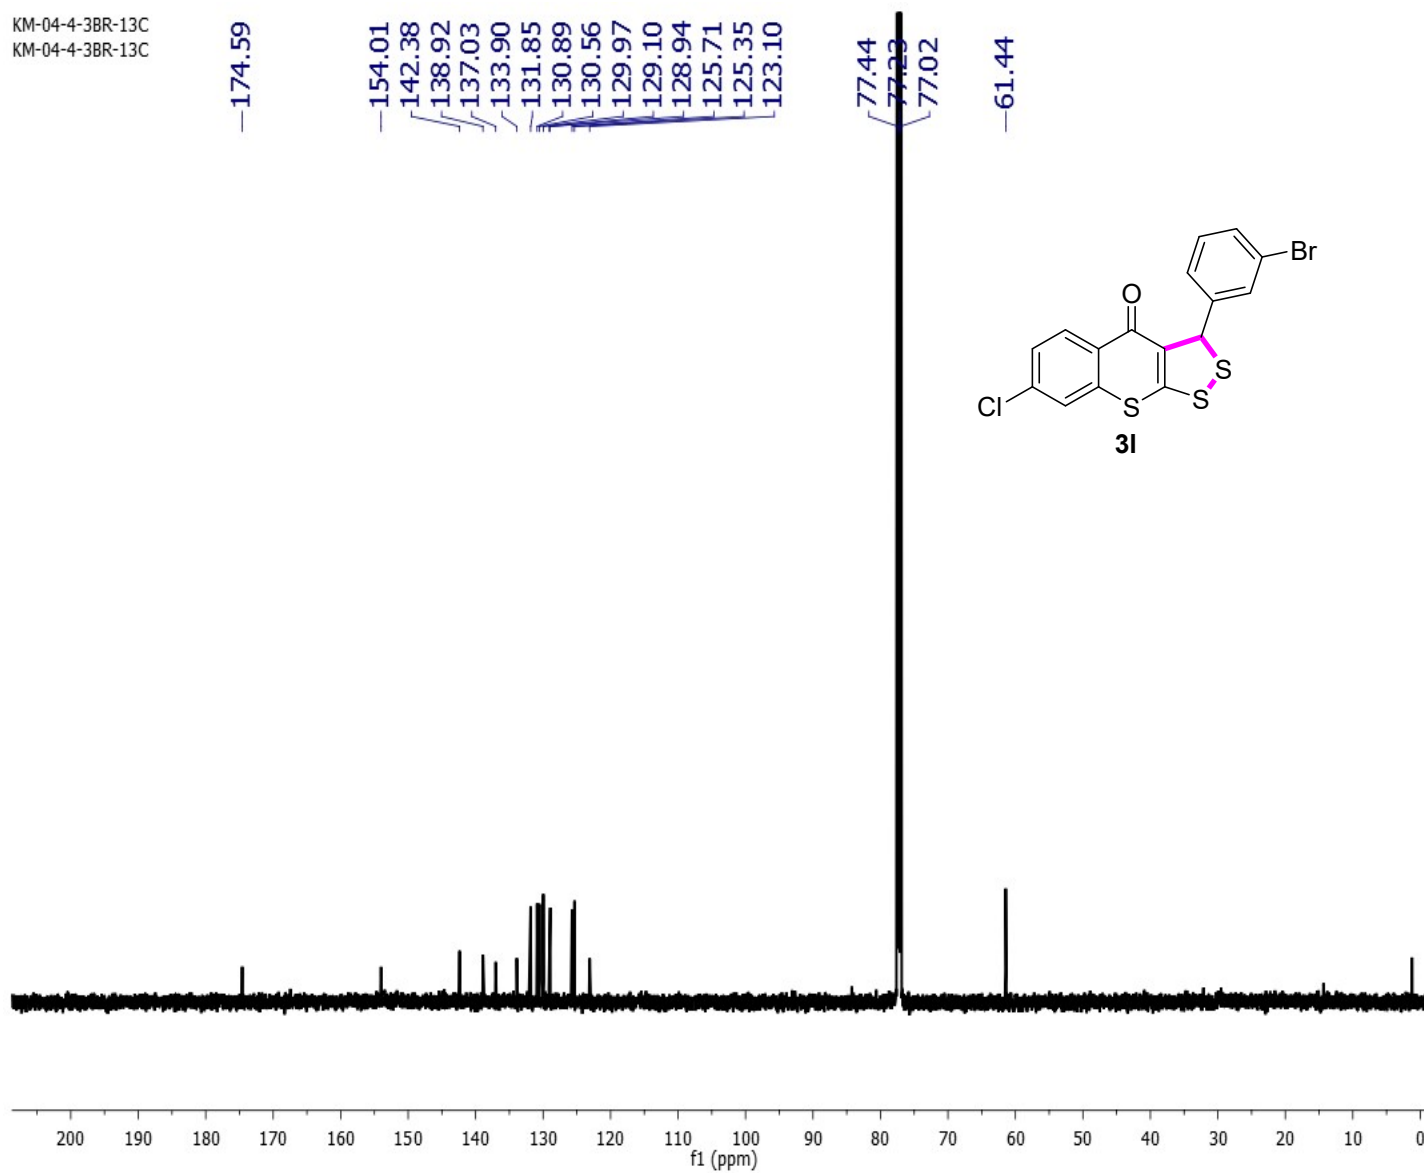

# HRMS spectra of compound: 3I

|               |               |             |        |                 |              |                        |                     |
|---------------|---------------|-------------|--------|-----------------|--------------|------------------------|---------------------|
| Sample Name   | KM-04-4-3Br   | Position    | Vial 1 | Instrument Name | Instrument 1 | User Name              |                     |
| Inj Vol       | 0             | InjPosition |        | SampleType      | Sample       | IRM Calibration Status | Some Ions Missed    |
| Data Filename | KM-04-4-3Br.d | ACQ Method  |        | Comment         |              | Acquired Time          | 5/4/2016 3:51:13 PM |

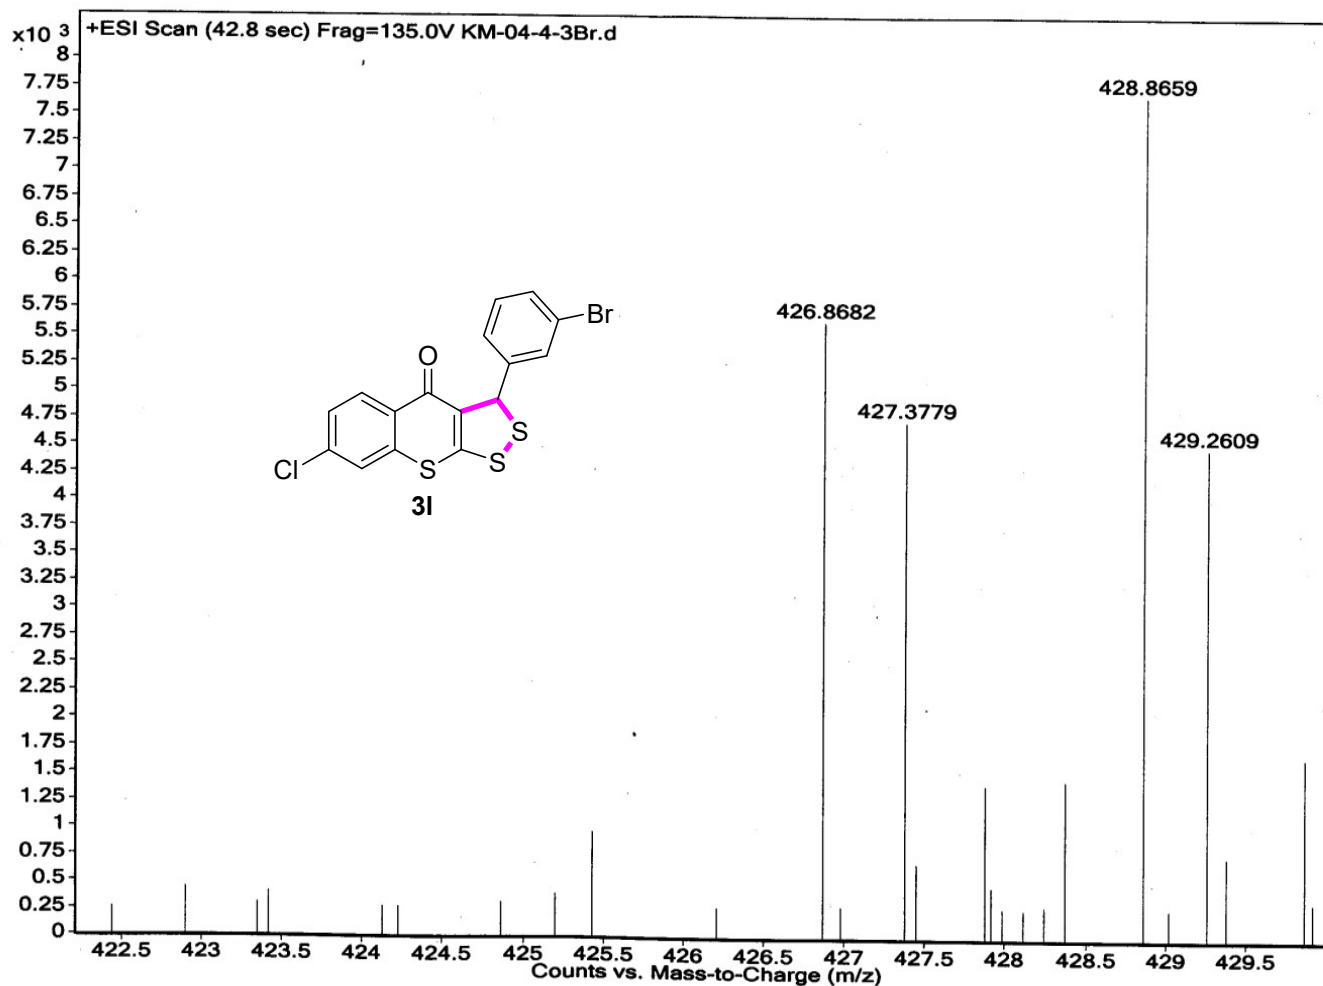

### <sup>1</sup>H NMR spectra of compound: 3m

SM-KM-4CLTH-2CL-1H.3  
SM-KM-4CLTH-2CL-1H

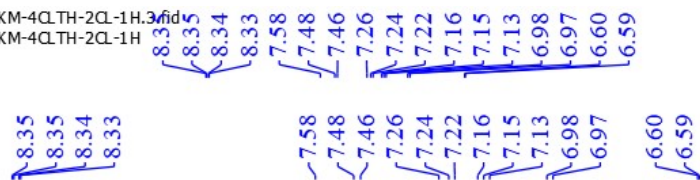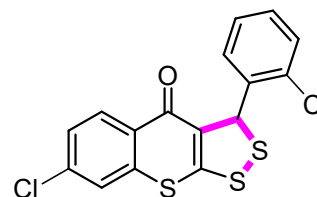

**3m**

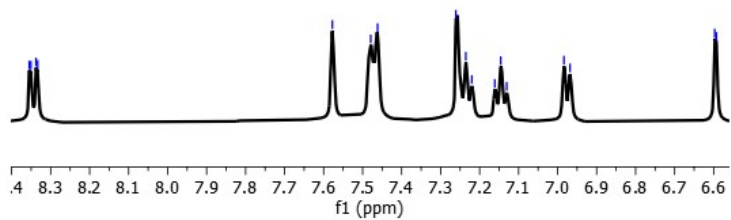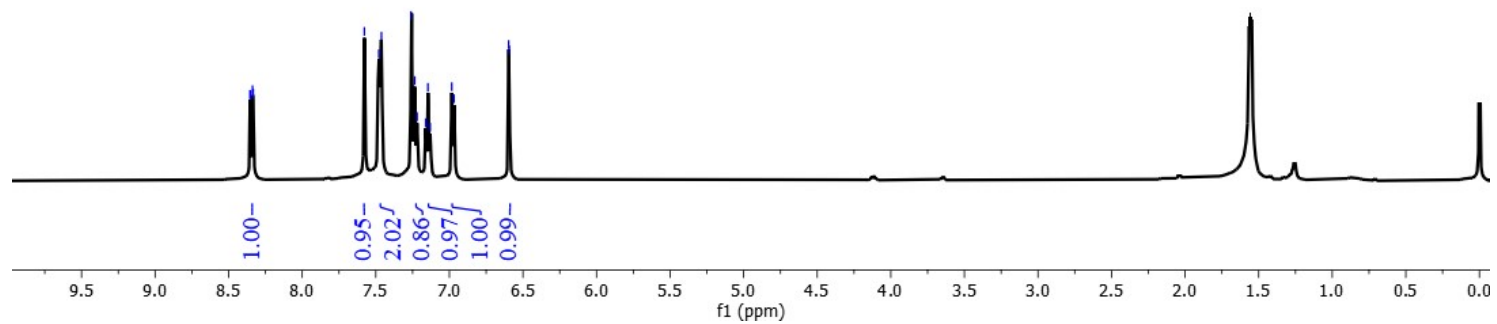



## HRMS spectra of compound: 3m

|             |                    |                        |         |                 |                                 |
|-------------|--------------------|------------------------|---------|-----------------|---------------------------------|
| Sample Name | SAMPLE             | Position               | P1-C2   | Instrument Name | Instrument 1                    |
| User Name   |                    | Inj Vol                | 20      | InjPosition     |                                 |
| Sample Type | Sample             | IRM Calibration Status | Success | Data Filename   | SM-ICLTH-2CLd                   |
| ACQ Method  | ESI ALS 100-1000,m | Comment                |         | Acquired Time   | 05-09-2021 12:01:41 (UTC+05:30) |

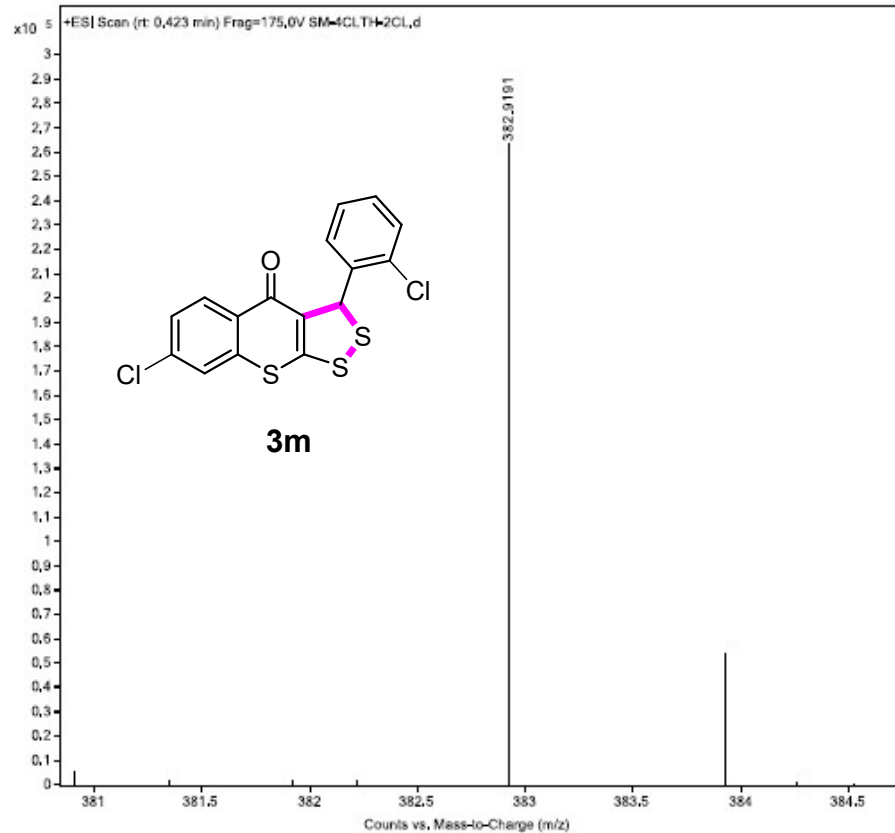

# <sup>1</sup>H NMR spectra of compound: 3n

KM-04-4-2011  
KM-04-4-2011  
8.25  
8.13  
7.57  
7.48  
7.45  
7.28  
7.26  
7.14  
7.12  
7.09  
7.08  
7.06  
7.04  
7.02  
6.53

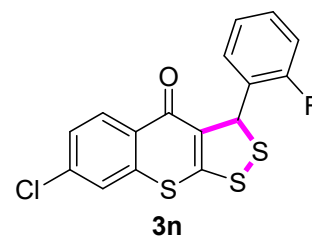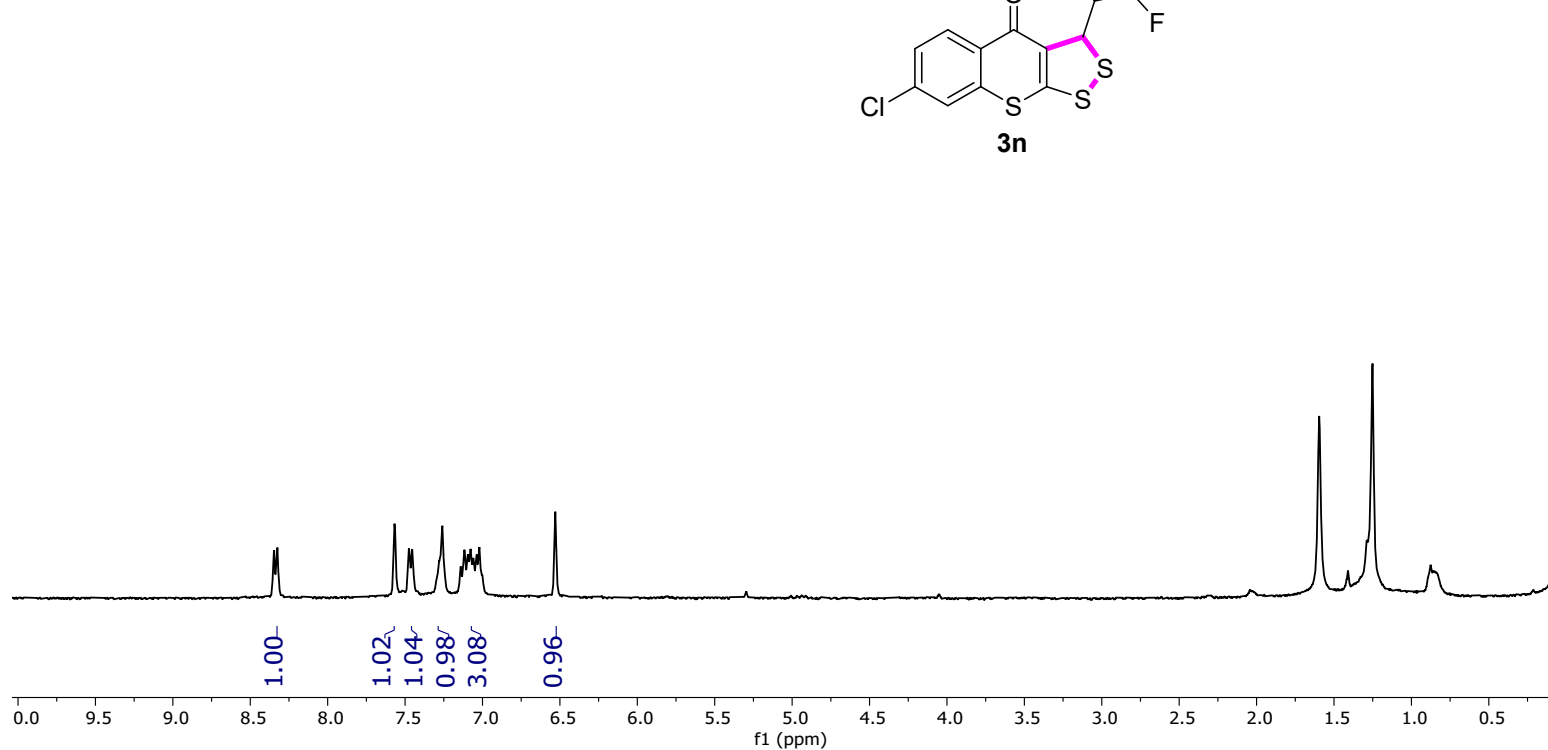

<sup>13</sup>CNMR spectra of compound: 3n

KM-04-4-2F-13C  
13C

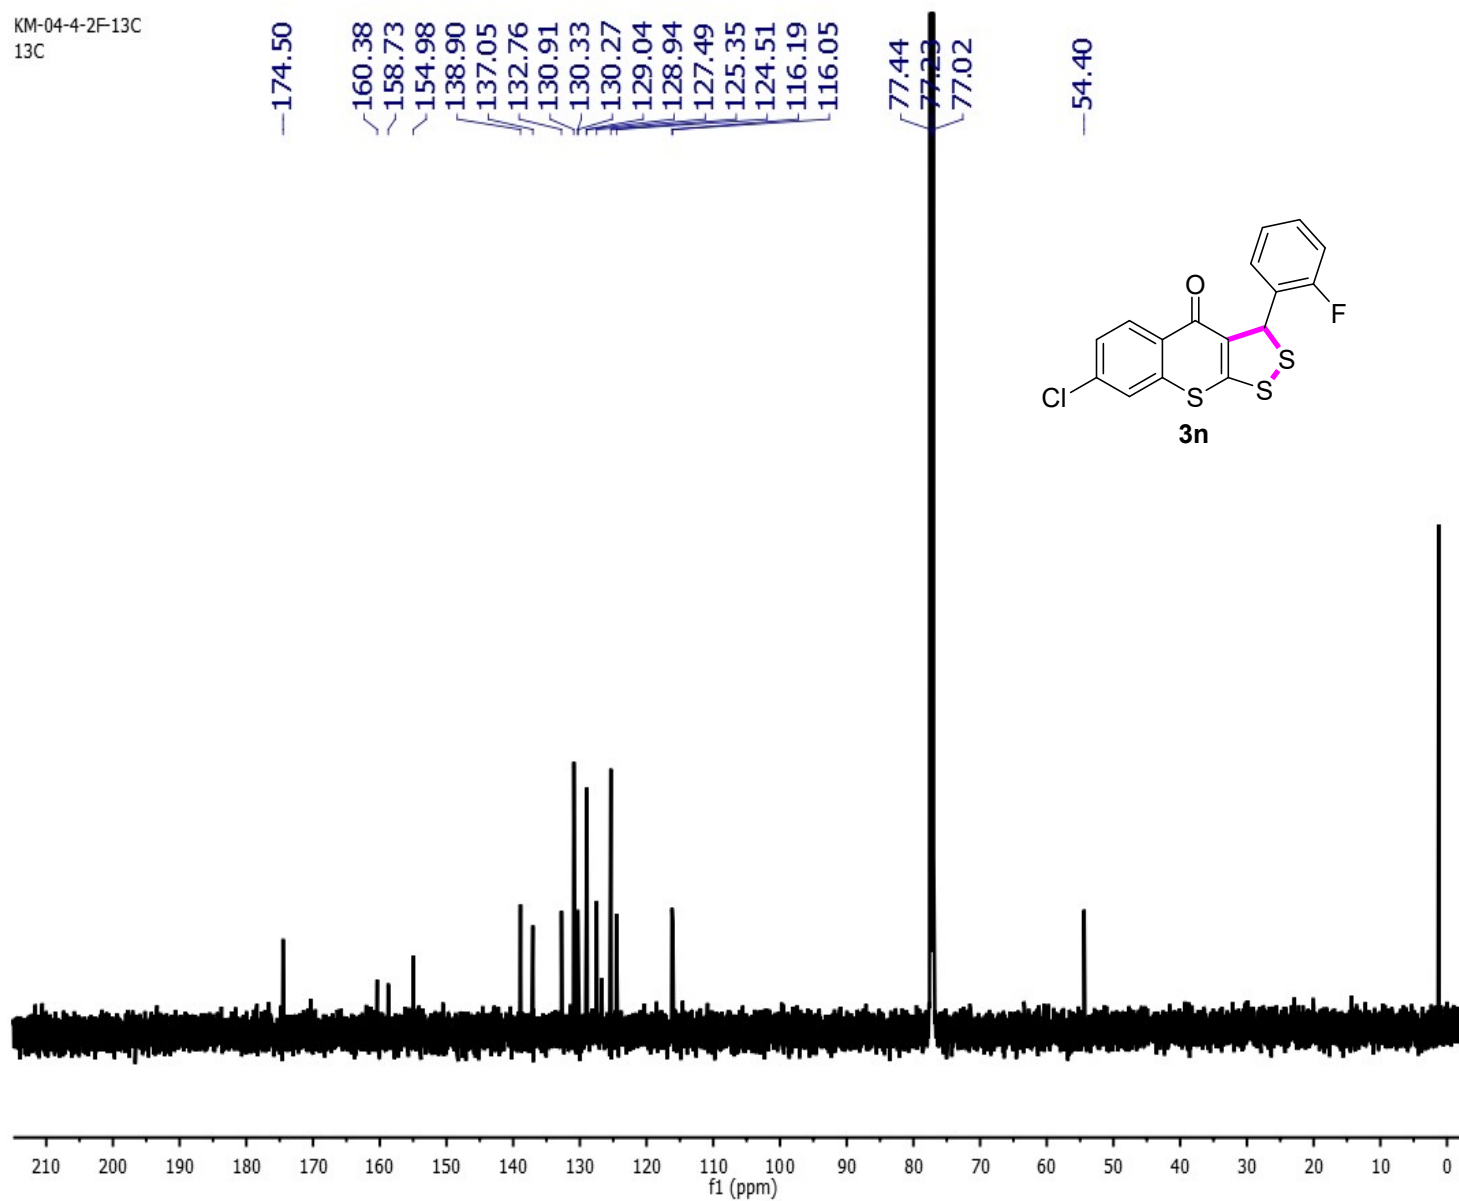

### HRMS spectra of compound: 3n

|               |             |             |             |                 |                                   |                        |                 |
|---------------|-------------|-------------|-------------|-----------------|-----------------------------------|------------------------|-----------------|
| Sample Name   | Unavailable | Position    | Unavailable | Instrument Name | Unavailable                       | User Name              | Unavailable     |
| Inj Vol       | Unavailable | InjPosition | Unavailable | SampleType      | Unavailable                       | IRM Calibration Status | All Ions Missed |
| Data Filename | KM-04-42A.d | ACQ Method  |             | Comment         | Sample information is unavailable | Acquired Time          | Unavailable     |

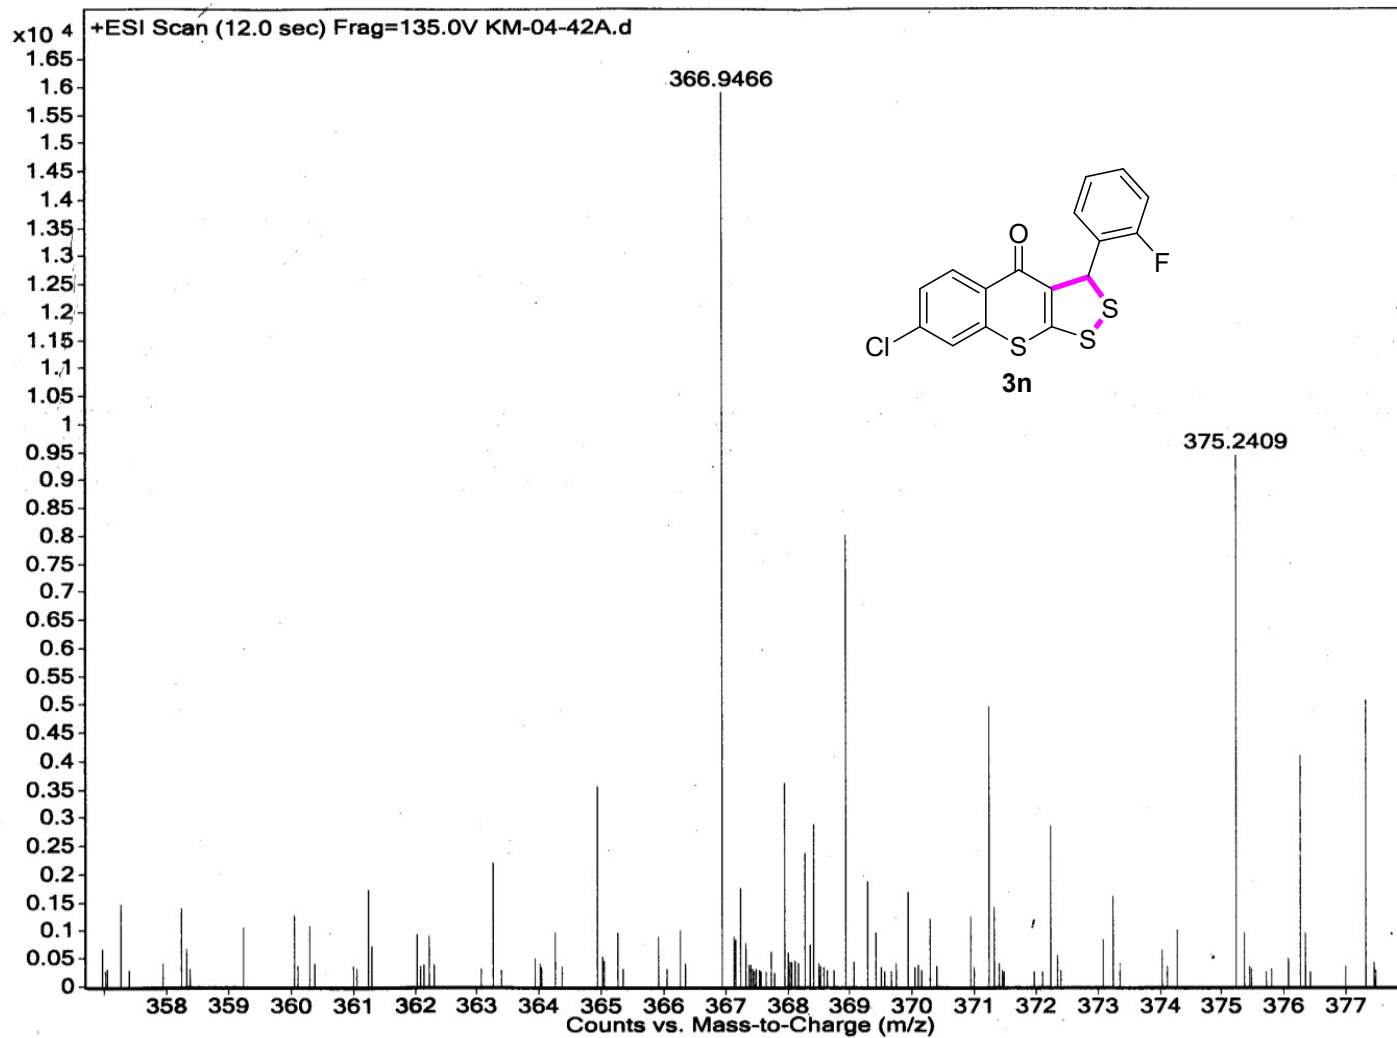



### <sup>1</sup>H NMR spectra of compound: 3o

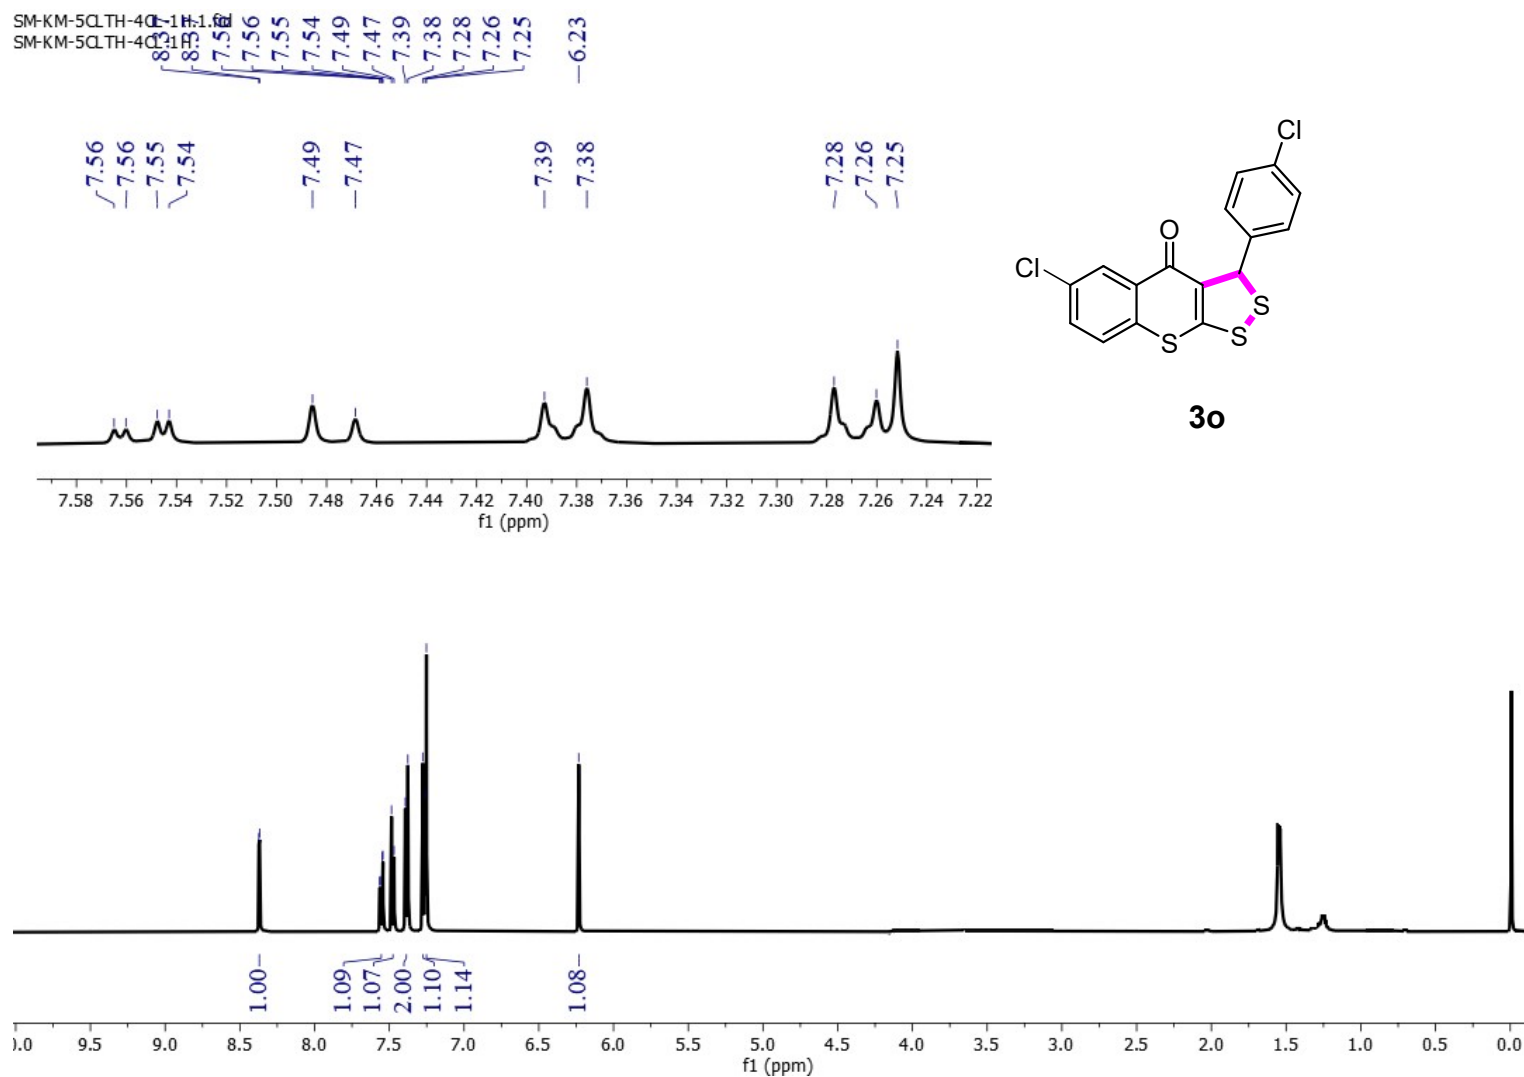

### <sup>13</sup>C NMR spectra of compound: 3o

SM-KM-5CITH-4Cl-13C-13fid  
SM-KM-5CITH-4Cl-13C-13fid

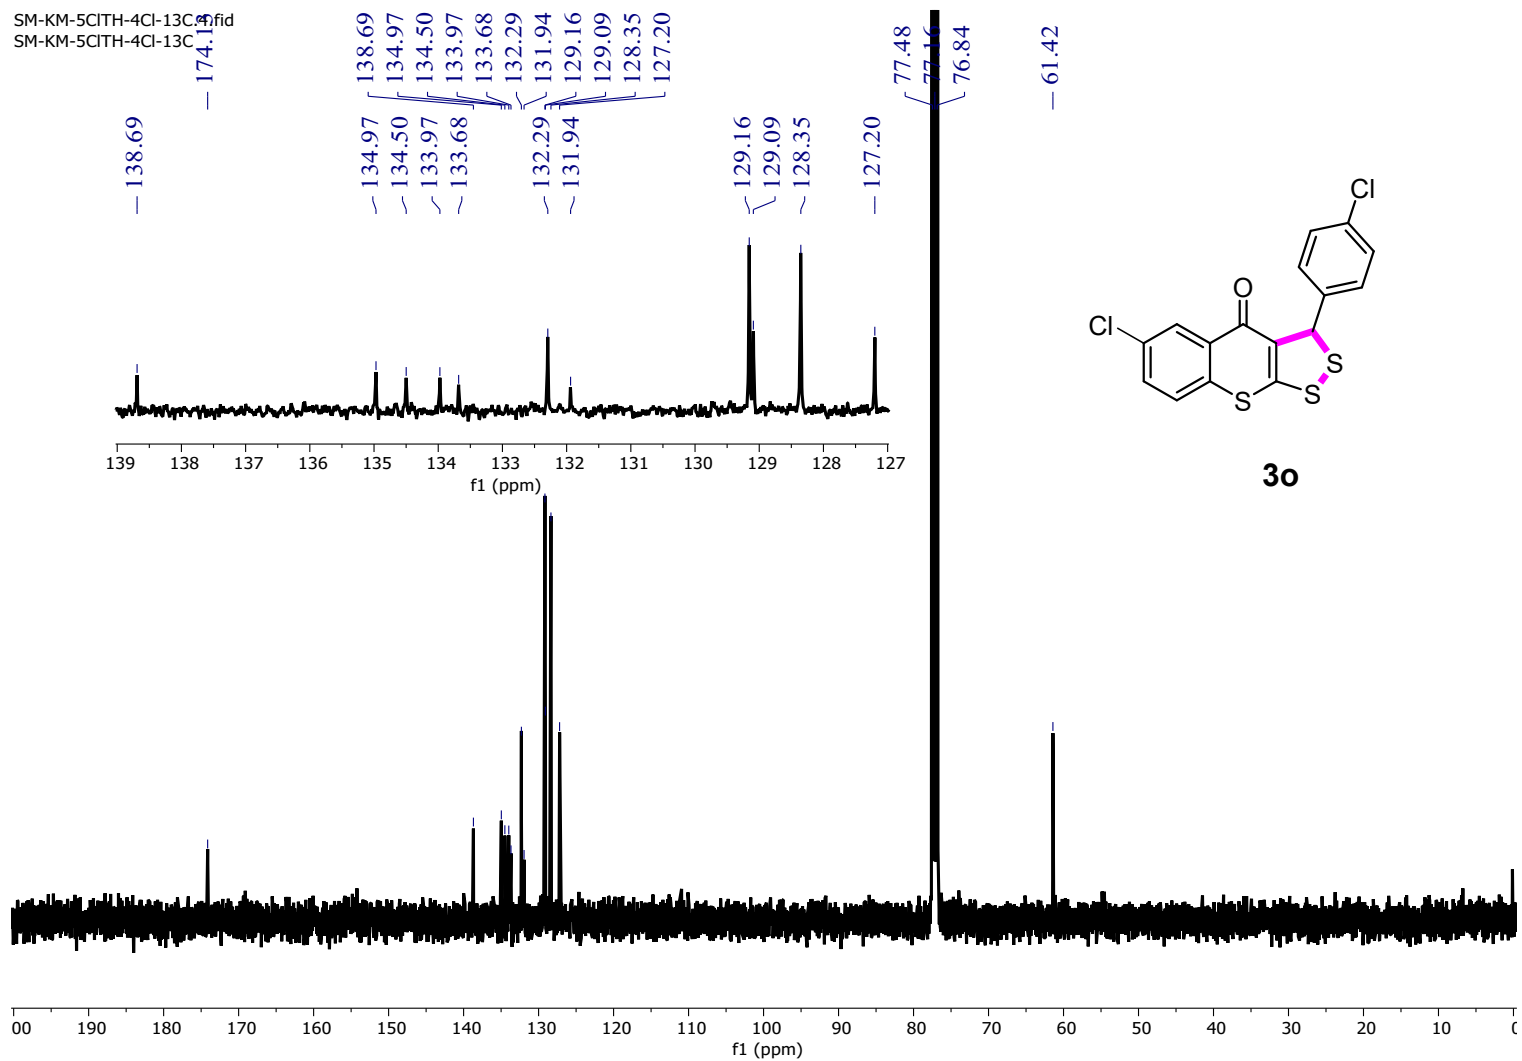

**HRMS of compound: 3o**

Sample Name  
User Name  
Sample Type  
ACQ Method

SAMPLE  
Sample  
ESI ALS 100-1000.m

Position P1-A10  
Inj Vol 20  
IRM Calibration Status Success  
Comment

Instrument Name Instrument 1  
InjPosition  
Data Filename SM-5CL-4CL.d  
Acquired Time 13-08-2021 13:42:32 (UTC+05:30)

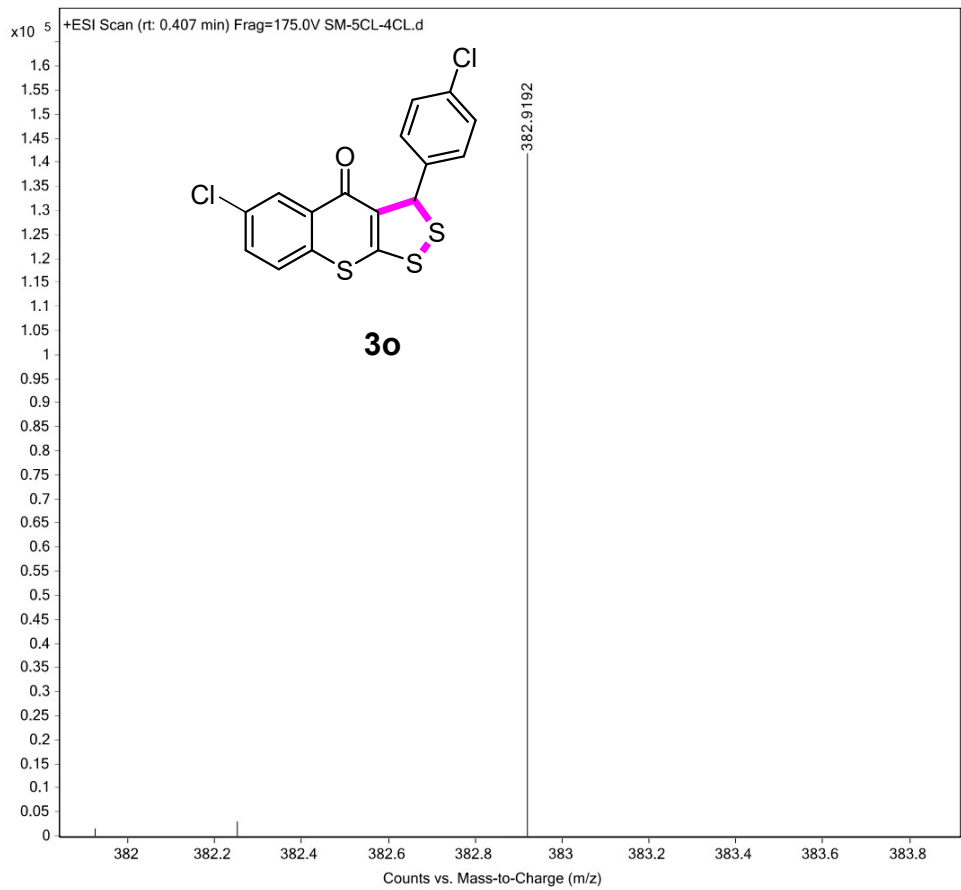

**<sup>1</sup>H NMR spectra of compound: 3p**

7.00  
7.01  
7.02  
7.03  
7.06  
7.06  
7.07  
7.08  
7.09  
7.09  
7.10  
7.10  
7.12  
7.12  
7.14  
7.14  
7.26

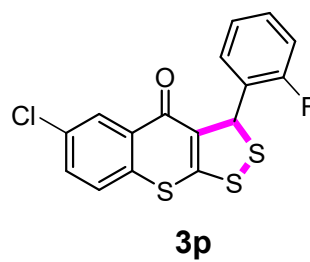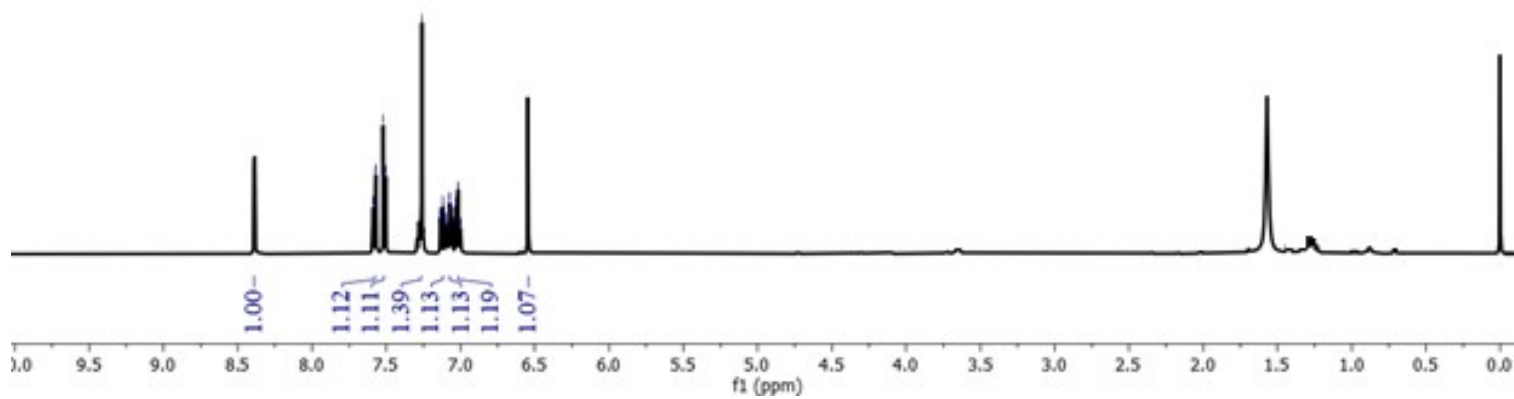

### <sup>13</sup>C NMR spectra of compound: 3p

SM-KM-5CL-2F-13C.16.fid  
SM-KM-5CL-2F-13C

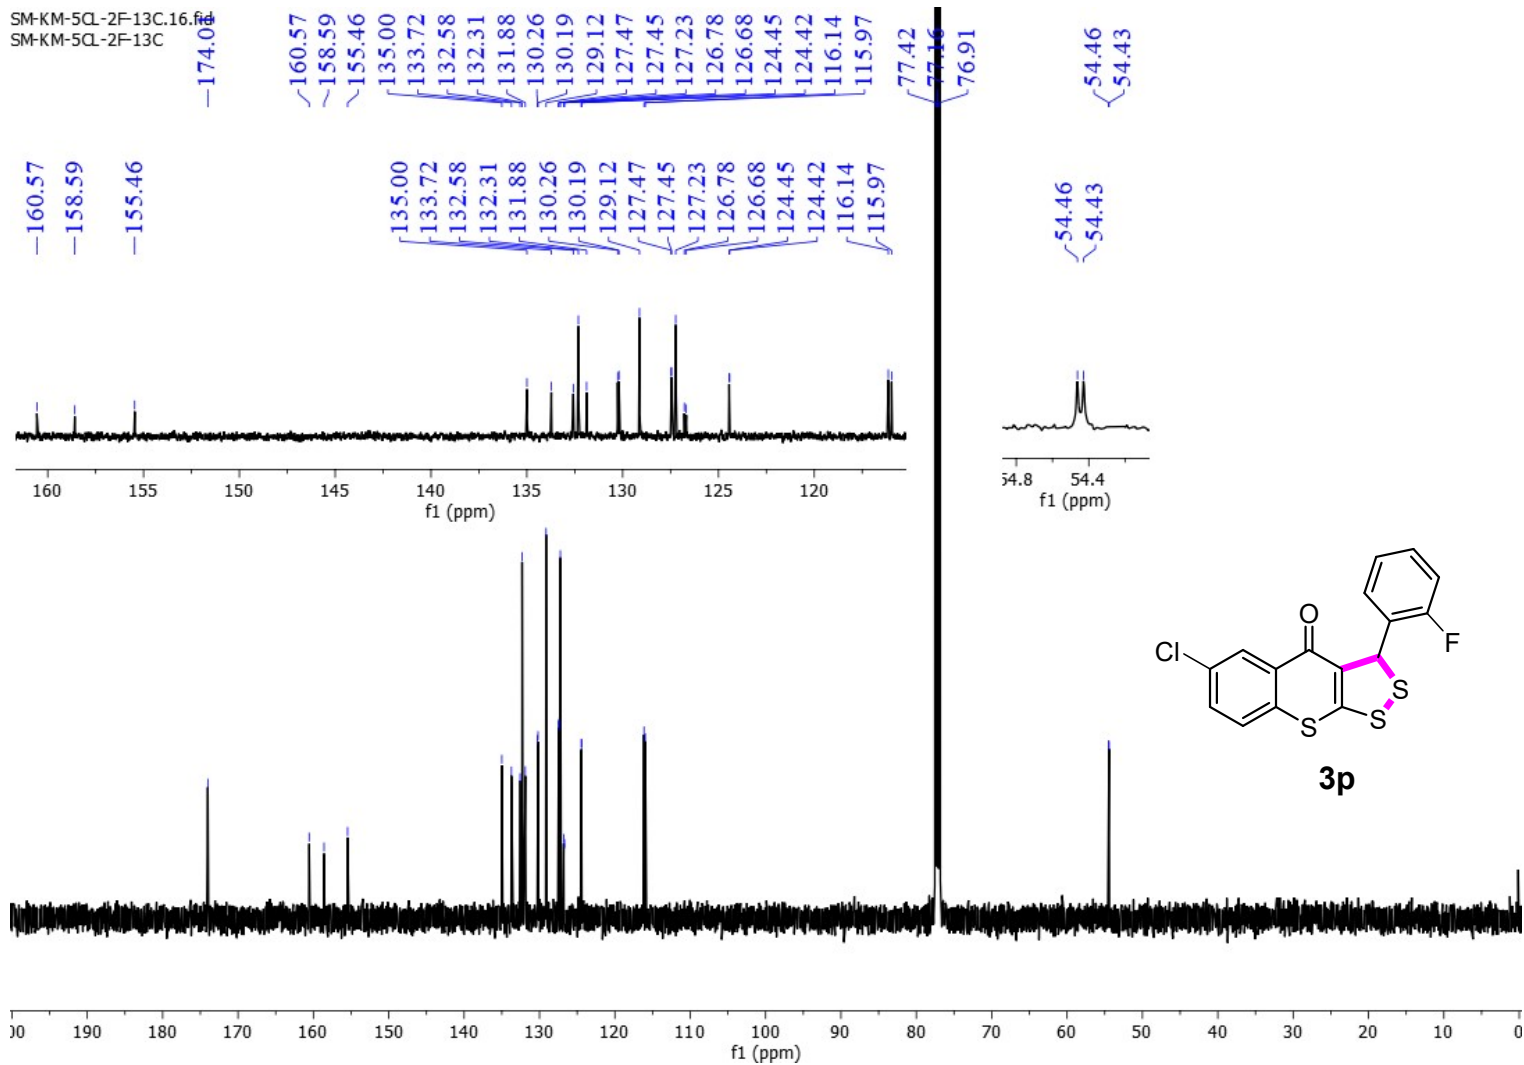

## HRMS of compound: 3p

|                    |                    |                               |         |                        |                                 |
|--------------------|--------------------|-------------------------------|---------|------------------------|---------------------------------|
| <b>Sample Name</b> | SAMPLE             | <b>Position</b>               | P1-A9   | <b>Instrument Name</b> | Instrument 1                    |
| <b>User Name</b>   |                    | <b>Inj Vol</b>                | 20      | <b>InjPosition</b>     |                                 |
| <b>Sample Type</b> | Sample             | <b>IRM Calibration Status</b> | Success | <b>Data Filename</b>   | SM-5CL-2F.d                     |
| <b>ACQ Method</b>  | ESI ALS 100-1000.m | <b>Comment</b>                |         | <b>Acquired Time</b>   | 13-08-2021 13:31:02 (UTC+05:30) |

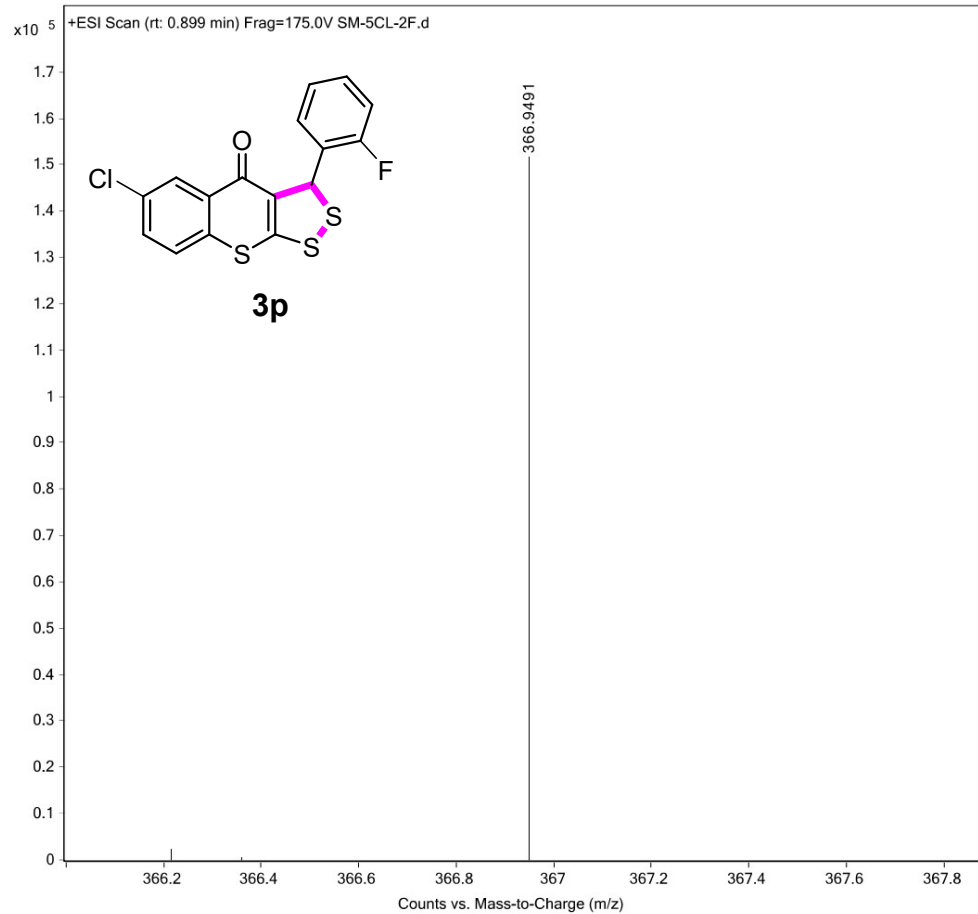

Supplement: d2nj04791h1.pdf [file d2nj04791h1.pdf]
